# Supplementary material for: Metal-free β,γ-C(sp3)–H difunctionalization of propanols: DMP-initiated asymmetric spirocyclopropanation
Source: Royal Society of Chemistry journal article supplement (doi:10.1039/d4cc00116h), 2024-01-01
Supplement: d4cc00116h1.pdf [file d4cc00116h1.pdf]

# Metal-free $\beta$ , $\gamma$ - C(sp<sup>3</sup>)-H Difunctionalization of Propanols: DMP-initiated Asymmetric Spirocyclopropanation

Zheyao Li<sup>1†</sup>, Huiwen Zhang<sup>1†</sup>, Lin Zhao<sup>1†</sup>, Yueyue Ma<sup>2\*</sup>, Qiufang Wu<sup>1</sup>, Haosong Ren<sup>1</sup>, Zhongren Lin<sup>1</sup>, Jun Zheng<sup>1\*</sup> and Xinhong Yu<sup>1\*</sup>

<sup>1</sup> Engineering Research Centre of Pharmaceutical Process Chemistry, Ministry of Education; Shanghai Key Laboratory of New Drug Design; School of Pharmacy and State Key Laboratory of Bioengineering Reactors, East China University of Science and Technology, 130 Mei-long Road, Shanghai 200237, China.

<sup>2</sup> School of Biomedical and Pharmaceutical Sciences, Guangdong University of Technology, Guangzhou 510006, China.

E-mail: mayueyue20121@gdut.edu.cn; jz@ecust.edu.cn; xhyu@ecust.edu.cn

## Supporting Information

### Table of Contents

|                                      |     |
|--------------------------------------|-----|
| 1. General information               | S2  |
| 2. Additional optimization studies   | S3  |
| 3. Control experiments               | S3  |
| 4. Experimental Section              | S4  |
| 5. X-ray data for compound <b>5b</b> | S15 |
| 6. NMR spectrum                      | S17 |
| 7. HPLC chromatograms                | S47 |

## 1. General Information

$^1\text{H}$  (400MHz) and  $^{13}\text{C}$  (101MHz) NMR spectra were recorded on a Bruker Advance 400 spectrometer in  $\text{CDCl}_3$  using TMS as internal reference. Chemical shifts for  $^1\text{H}$  NMR spectra are reported in units of parts per million (ppm) downfield from  $\text{SiMe}_4$  ( $\delta$  0.00) and relative to the signal of chloroform ( $\delta$  7.26, singlet). Multiplicities are indicated by s (singlet), d (doublet), t (triplet), q (quartet), quint (pentet), m (multiplet), and b (broad). Coupling constants, J, are reported in Hertz.  $^{13}\text{C}$  NMR spectra are reported as  $\delta$  in units of parts per million (ppm) relative to the signal of chloroform ( $\delta$  77.16, triplet).

High performance liquid chromatography (HPLC) was performed on Hitachi detectors ( $\lambda= 254$  nm) using Daicel Chiralpak AD-3 and OD-3 columns. Retention times (tR) and peak areas for HPLC were obtained from reporting integrators.

High resolution mass spectra (HRMS) were recorded under electron impact conditions using a MicroMass GCT CA 055 instrument and recorded on a MicroMass LCTTM spectrometer.

All chemicals were reagent grade and were used as received without further purification. Column chromatography was carried out using 300-400 mesh silica gel.

## 2. Additional optimization studies <sup>a</sup>

**Table S1.** Solvent and temperature optimization

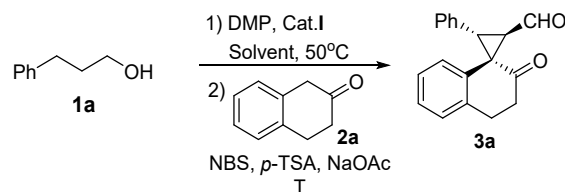

| entry | T    | solvent           | t <sup>b</sup> (h) | yield <sup>c</sup> (%) | dr <sup>d</sup> (%) | ee <sup>e</sup> (%) |
|-------|------|-------------------|--------------------|------------------------|---------------------|---------------------|
| 6     | 25°C | THF               | 3                  | 11                     | ND <sup>f</sup>     | ND                  |
| 7     | 25°C | CHCl <sub>3</sub> | 3                  | 51                     | 74:26               | 92                  |
| 8     | 25°C | Toluene           | 3                  | trace                  | ND                  | ND                  |
| 9     | 25°C | DMF               | 3                  | trace                  | ND                  | ND                  |
| 10    | 25°C | DCM               | 3                  | 65                     | 76:24               | 97                  |
| 11    | 0°C  | DCM               | 9                  | 61                     | 75:25               | 97                  |
| 13    | 10°C | DCM               | 7                  | 60                     | 71:29               | 97                  |
| 14    | 35°C | DCM               | 3                  | 49                     | 70:30               | 96                  |

<sup>a</sup> Reaction conditions: **1a** (1.0 mmol, 1.0 equiv.), DMP (1.0 mmol, 1.0 equiv.), catalyst (0.2 mmol, 0.2 equiv.), and 5 mL solvent were stirred at 50 °C for two hours. Then **1b** (1.0 mmol, 1.0 equiv.), *p*-TSA (0.2 mmol, 0.2 equiv.), NBS (1.2 mmol, 1.2 equiv.) were added to the solution sequentially at 25 °C, and NaOAc (4.0 mmol, 4.0 equiv.) were added after half an hour, then the mixture was stirred at showed temperature. <sup>b</sup> The time of second step. <sup>c</sup> Isolated yields. <sup>d</sup> Determined from crude product by <sup>1</sup>H NMR. <sup>e</sup> Determined by chiral HPLC analysis. <sup>f</sup>Not determined.

## 3. Control experiments.

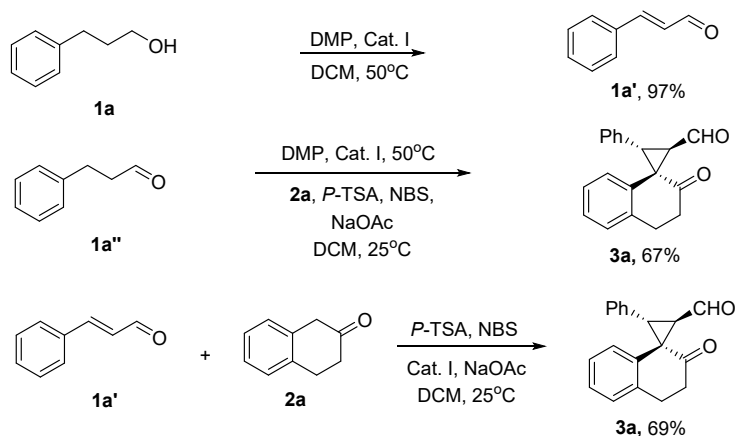

## 4. Experimental Section

### 4.1 General Procedure for Synthesis of 3a-3q

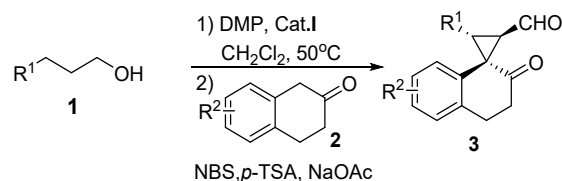

General procedure: **1** (1.0 mmol, 1.0 equiv.), DMP (1.0 mmol, 1.0 equiv.), Cat. **I** (0.2 mmol, 0.2 equiv.), were added to 5 mL CH<sub>2</sub>Cl<sub>2</sub> sequentially, stirred at 50°C. When compound **1** was transformed completely in almost two hours, **2** (1.0 mmol, 1.0 equiv.), *p*-TSA (0.2 mmol, 0.2 equiv.) and NBS (1.2 mmol, 1.2 equiv.) were added sequentially to the mixture and stirred at 25°C, and NaOAc (4.0 mmol, 4.0 equiv.) were added to the mixture after half an hour. After reaction was completed, the mixture was filtered, concentrated under reduce pressure, keeping the bath temperature under 35°C. The residue was purified by silica gel column chromatography using mixture of petrol ether/ethyl acetate. Racemic samples were obtained with racemic version of Cat. **I** (20 mol %).

### 4.2 Gram-scale Synthesis of 3a

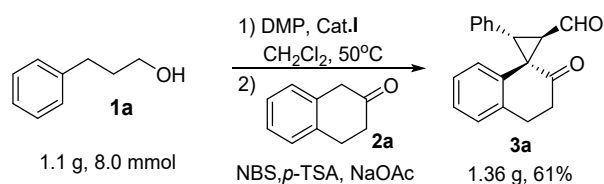

**1a** (1.10 g, 8.0 mmol), DMP (3.43 g, 8.0 mmol), Cat. **I** (0.53 g, 1.6 mmol), were added to 100 mL CH<sub>2</sub>Cl<sub>2</sub> sequentially, stirred at 50°C. When compound **1a** was transformed completely in two hours, **2a** (1.18 g, 8.0 mmol), *p*-TSA (0.28 g, 1.6 mmol) and NBS (1.73 g, 9.6 mmol) were added sequentially to the mixture and stirred at 25°C, and NaOAc (2.65 g, 32.3 mmol) were added to the mixture after half an hour. After reaction was completed, the mixture was filtered, concentrated under reduce pressure, keeping the bath temperature under 35°C. The residue was purified by silica gel column chromatography using mixture of petrol ether/ethyl acetate (10:1, v/v) to obtain **3a** (1.36 g, 61%, 96% ee, 70/30 dr).

### 4.3 Characterization of the product 3a-3p

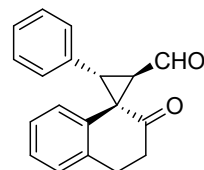

**(1R,2R,3S)-2'-oxo-3-phenyl-3',4'-dihydro-2'H-spiro[cyclopropane-1,1'-naphthalene]-2-carbaldehyde (3a).**

Yellow oil. Isolated yield: 177 mg, 64%. ee 97%. d.r. 77/23. <sup>1</sup>H NMR (400 MHz, CDCl<sub>3</sub>) δ 9.53 (d, *J* = 4.9 Hz, 1H), 7.33 – 7.27 (m, 6H), 7.23 (d, *J* = 7.3 Hz, 3H), 3.88 (d, *J* = 7.6 Hz, 1H), 3.64 (dd, *J* = 7.5, 4.9 Hz, 1H), 3.09 (dt, *J* = 15.1, 6.0 Hz, 1H), 3.04 – 2.95 (m, 1H), 2.53 (dt, *J* = 11.1, 9.7, 6.4 Hz, 1H), 2.40 – 2.31 (m, 1H). <sup>13</sup>C NMR (101 MHz, CDCl<sub>3</sub>) δ 203.5, 197.5, 139.7, 133.6,

133.0, 128.7(2C), 128.7(2C), 128.2, 127.7, 127.5, 127.0, 125.9, 48.6, 42.1, 39.2, 39.0, 28.0. HRMS (EI) calc. for C<sub>19</sub>H<sub>16</sub>O<sub>2</sub> [M<sup>+</sup>]: 276.1150; found: 276.1155. HPLC (Daicel chiralpak AD-3, hexane/*i*-PrOH = 70:25, flow rate 1.0mL / min., λ = 254 nm): tr = 7.20 min. (major), tr = 8.28 min. (minor).

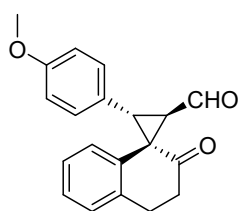

**(1*R*,2*R*,3*S*)-3-(4-methoxyphenyl)-2'-oxo-3',4'-dihydro-2'*H*-spiro[cyclopropane-1,1'-naphthalene]-2-carbaldehyde (3b).**

Yellow oil. Isolated yield: 193 mg, 63%. ee 97% d.r. 72/28. <sup>1</sup>H NMR (400 MHz, CDCl<sub>3</sub>) δ 9.55 (d, J = 5.0 Hz, 1H), 7.27 (s, 2H), 7.26 – 7.24 (m, 1H), 7.16 (dd, J = 10.4, 6.5 Hz, 3H), 6.85 – 6.82 (m, 2H), 3.78 (d, J = 4.7 Hz, 4H), 3.63 (dd, J = 7.6, 5.0 Hz, 1H), 3.13 – 3.05 (m, 1H), 3.02 – 2.94 (m, 1H), 2.50 (dt, J = 16.3, 6.8, 4.6 Hz, 1H), 2.35 (dt, J = 16.5, 9.0, 5.5 Hz, 1H). <sup>13</sup>C NMR (101 MHz, CDCl<sub>3</sub>) δ 203.5, 197.7, 158.9, 139.7, 133.3, 129.8(2C), 128.2, 127.6, 127.0, 125.9, 125.3, 113.8(2C), 55.2, 48.9, 42.0, 39.1, 39.0, 28.0. HRMS (EI) calc. for C<sub>20</sub>H<sub>18</sub>O<sub>3</sub> [M<sup>+</sup>]: 306.1256; found: 306.1255. HPLC (Daicel chiralpak AD-3, hexane/*i*-PrOH = 85:15, flow rate 1.0mL / min., λ = 254 nm): tr = 14.68 min. (major), tr = 20.18 min. (minor).

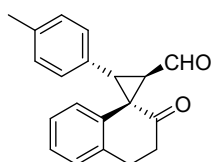

**(1*R*,2*R*,3*S*)-2'-oxo-3-(*p*-tolyl)-3',4'-dihydro-2'*H*-spiro[cyclopropane-1,1'-naphthalene]-2-carbaldehyde (3c).**

Yellow oil. Isolated yield: 189 mg, 65%. ee 97% d.r. 80/20. <sup>1</sup>H NMR (400 MHz, CDCl<sub>3</sub>) δ 9.96 (d, J = 4.5 Hz, 1H), 7.14 – 7.08 (m, 2H), 7.07 – 6.99 (m, 2H), 6.91 (d, J = 7.9 Hz, 2H), 6.84 (d, J = 7.6 Hz, 2H), 3.66 (d, J = 7.4 Hz, 1H), 3.30 (dd, J = 7.4, 4.5 Hz, 1H), 3.09 (td, J = 14.2, 4.3 Hz, 1H), 2.95 (dt, J = 14.9, 5.4, 2.7 Hz, 1H), 2.87 (dt, J = 17.2, 4.2, 3.0 Hz, 1H), 2.53 (dt, J = 17.4, 13.5, 5.6 Hz, 1H), 2.20 (s, 3H). <sup>13</sup>C NMR (101 MHz, CDCl<sub>3</sub>) δ 208.6, 198.9, 138.4, 137.4, 131.0, 129.5, 129.0(2C), 128.7(2C), 127.5, 127.1, 126.4, 125.7, 52.2, 42.6, 39.7, 38.5, 27.8, 21.05. HRMS (EI) calc. for C<sub>20</sub>H<sub>18</sub>O<sub>2</sub> [M<sup>+</sup>]: 290.1307; found: 290.1309. HPLC (Daicel chiralpak AD-3, hexane/*i*-PrOH = 85:15, flow rate 1.0mL / min., λ = 254 nm): tr = 8.74 min. (major), tr = 10.59 min. (minor).

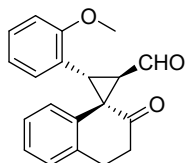

**(1*R*,2*R*,3*S*)-3-(2-methoxyphenyl)-2'-oxo-3',4'-dihydro-2'*H*-spiro[cyclopropane-1,1'-naphthalene]-2-carbaldehyde (3d).**

Yellow oil. Isolated yield: 211 mg, 69%. ee >99% d.r. 90/10. <sup>1</sup>H NMR (400 MHz, CDCl<sub>3</sub>) δ 9.99 (d, J = 4.3 Hz, 1H), 7.10 (dd, J = 13.9, 7.1 Hz, 2H), 7.03 – 6.94 (m, 2H), 6.89 (t, J = 7.6 Hz, 1H), 6.77 (t, J = 7.5 Hz, 1H), 6.65 – 6.58 (m, 2H), 3.74 (d, J = 8.1 Hz, 1H), 3.64 (s, 3H), 3.29 (dd, J = 7.9, 4.4 Hz, 1H), 3.27 – 3.20 (m, 1H), 2.96 – 2.85 (m, 2H), 2.55 (dt, J = 16.6, 13.5, 5.7 Hz, 1H). <sup>13</sup>C NMR (101 MHz, CDCl<sub>3</sub>) δ 209.2, 199.3, 158.4, 138.3, 131.3, 129.3, 129.1, 127.3, 126.7, 125.9, 124.8, 121.3, 119.9, 109.8, 55.0, 50.8, 39.8, 39.6, 38.9, 27.4. HRMS (EI) calc. for C<sub>20</sub>H<sub>18</sub>O<sub>3</sub> [M<sup>+</sup>]: 306.1256; found: 306.1257. HPLC (Daicel chiralpak AD-3, hexane/*i*-PrOH = 85:15, flow rate 1.0mL / min., λ = 254 nm): tr = 12.57 min. (minor), tr = 16.56 min. (major).

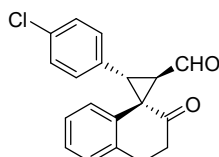

**(1*R*,2*S*,3*R*)-2-(4-chlorophenyl)-2'-oxo-3',4'-dihydro-2'*H*-spiro[cyclopropane-1,1'-naphthalene]-3-carbaldehyde (3e).**

Yellow oil. Isolated yield: 183 mg, 59%. ee 94% d.r. 74/26. <sup>1</sup>H NMR (400 MHz, CDCl<sub>3</sub>) δ 9.96 (d, J = 4.3 Hz, 1H), 7.16 – 7.07 (m, 4H), 7.04 (t, J = 7.5 Hz, 1H), 6.89 (d, J = 8.2 Hz, 2H), 6.80 (d, J = 7.7 Hz, 1H), 3.65 (d, J = 7.4 Hz, 1H), 3.28 (dd, J = 7.3, 4.4 Hz, 1H), 3.11 – 3.02 (m, 1H), 3.01 – 2.94 (m, 1H), 2.89 (dd, J = 17.3, 3.6 Hz, 1H), 2.60 – 2.48 (m, 1H). <sup>13</sup>C NMR (101 MHz, CDCl<sub>3</sub>) δ 203.6, 197.0, 139.5, 133.3, 132.6, 132.2, 130.1(2C), 128.5(2C), 128.3, 127.8, 127.0, 125.9, 48.1, 42.6, 39.4, 37.8, 28.0. HRMS (EI) calc. for C<sub>19</sub>H<sub>15</sub>ClO<sub>2</sub> [M<sup>+</sup>]: 310.0761; found: 310.0762. HPLC (Daicel chiralpak AD-3, hexane/i-PrOH = 85:15, flow rate 1.0mL / min., λ = 254 nm): tr = 7.71 min. (major), tr = 9.33 min. (minor).

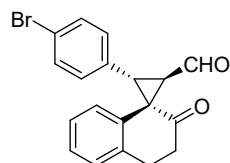

**(1R,2S,3R)-2-(4-bromophenyl)-2'-oxo-3',4'-dihydro-2'H-spiro[cyclopropane-1,1'-naphthalene]-3-carbaldehyde (3f).**

Yellow oil. Isolated yield: 206 mg, 58%. ee 96% d.r. 79/21. <sup>1</sup>H NMR (400 MHz, CDCl<sub>3</sub>) δ 9.49 (d, J = 4.7 Hz, 1H), 7.43 (d, J = 8.3 Hz, 2H), 7.28 (d, J = 2.7 Hz, 3H), 7.23 (s, 1H), 7.11 (d, J = 8.2 Hz, 2H), 3.87 (d, J = 7.6 Hz, 1H), 3.57 (dd, J = 7.5, 4.7 Hz, 1H), 3.10 – 2.99 (m, 2H), 2.57 (dt, J = 16.3, 5.2 Hz, 1H), 2.44 – 2.34 (m, 1H). <sup>13</sup>C NMR (101 MHz, CDCl<sub>3</sub>) δ 203.6, 197.0, 139.5, 132.7, 132.5, 131.5(2C), 130.5(2C), 128.3, 127.8, 127.0, 125.9, 121.5, 48.0, 42.6, 39.4, 37.9, 28.0. HRMS (EI) calc. for C<sub>19</sub>H<sub>15</sub>BrO<sub>2</sub> [M<sup>+</sup>]: 354.0255; found: 354.0254. HPLC (Daicel chiralpak AD-3, hexane/i-PrOH = 85:15, flow rate 1.0mL / min., λ = 254 nm): tr = 9.39 min. (major), tr = 11.25 min. (minor).

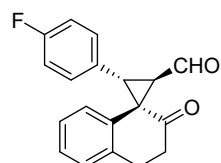

**(1R,2S,3R)-2-(4-fluorophenyl)-2'-oxo-3',4'-dihydro-2'H-spiro[cyclopropane-1,1'-naphthalene]-3-carbaldehyde (3g).**

Yellow oil. Isolated yield: 176 mg, 60%. ee 95% d.r. 75/25. <sup>1</sup>H NMR (400 MHz, CDCl<sub>3</sub>) δ 9.50 (d, J = 4.7 Hz, 1H), 7.28 (d, J = 2.5 Hz, 3H), 7.24 – 7.18 (m, 3H), 7.00 (t, J = 8.5 Hz, 2H), 3.89 (d, J = 7.6 Hz, 1H), 3.59 (dd, J = 7.5, 4.8 Hz, 1H), 3.11 – 2.97 (m, 2H), 2.55 (dt, J = 16.3, 5.2 Hz, 1H), 2.38 (dt, J = 16.0, 9.6, 6.0 Hz, 1H). <sup>13</sup>C NMR (101 MHz, CDCl<sub>3</sub>) δ 208.5, 198.5, 162.1 (d, J = 247.0 Hz), 138.3, 130.7, 130.5 (d, J = 8.2 Hz) (2C), 128.5 (d, J = 3.1 Hz), 127.7, 127.3, 126.5, 125.5, 115.3 (d, J = 21.5 Hz) (2C), 51.6, 41.8, 39.7, 38.5, 27.7. HRMS (EI) calc. for C<sub>19</sub>H<sub>15</sub>FO<sub>2</sub> [M<sup>+</sup>]: 294.1056; found: 294.1057. HPLC (Daicel chiralpak AD-3, hexane/i-PrOH = 80:20, flow rate 1.0mL / min., λ = 254 nm): tr = 7.50 min. (major), tr = 9.12 min. (minor).

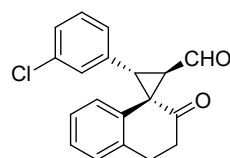

**(1R,2S,3R)-2-(3-chlorophenyl)-2'-oxo-3',4'-dihydro-2'H-spiro[cyclopropane-1,1'-naphthalene]-3-carbaldehyde (3h).**

Yellow oil. Isolated yield: 193 mg, 62%. ee 95% d.r. 82/18. <sup>1</sup>H NMR (400 MHz, CDCl<sub>3</sub>) δ 9.95 (d, J = 4.3 Hz, 1H), 7.14 (t, J = 7.2 Hz, 2H), 7.09 – 7.04 (m, 3H), 6.98 (s, 1H), 6.81 (dd, J = 7.5, 2.9 Hz, 2H), 3.65 (d, J = 7.4 Hz, 1H), 3.29 (dd, J = 7.3, 4.3 Hz, 1H), 3.14 – 3.04 (m, 1H), 2.98 (dt, J = 15.1, 5.6, 2.7 Hz, 1H), 2.89 (dt, J = 17.2, 4.1, 3.0 Hz, 1H), 2.55 (dt, J = 17.3, 13.4, 5.7 Hz, 1H). <sup>13</sup>C NMR (101 MHz, CDCl<sub>3</sub>) δ 208.3, 198.2, 138.4, 134.8, 134.2, 130.4, 129.5, 129.0, 127.9, 127.8, 127.4, 127.0, 126.5, 125.6, 51.6, 41.6, 39.4,

38.5, 27.7. HRMS (EI) calc. for C<sub>19</sub>H<sub>15</sub>FO<sub>2</sub> [M<sup>+</sup>]: 310.0761; found: 310.0760. HPLC (Daicel chiralpak AD-3, hexane/*i*-PrOH = 85:15, flow rate 1.0mL / min., λ = 254 nm): tr = 9.18 min. (major), tr = 10.66 min. (minor).

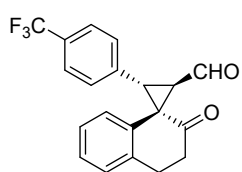

**(1*R*,2*R*,3*S*)-2'-oxo-3-(4-(trifluoromethyl)phenyl)-3',4'-dihydro-2'*H*-spiro[cyclopropane-1,1'-naphthalene]-2-carbaldehyde (3i).**

Yellow oil. Isolated yield: 203 mg, 59%. ee 95% d.r. 77/23. <sup>1</sup>H NMR (400 MHz, CDCl<sub>3</sub>) δ 9.40 (d, *J* = 4.5 Hz, 1H), 7.49 (d, *J* = 8.1 Hz, 2H), 7.28 (d, *J* = 8.1 Hz, 2H), 7.23 – 7.18 (m, 4H), 3.92 (d, *J* = 7.6 Hz, 1H), 3.51 (dd, *J* = 7.6, 4.5 Hz, 1H), 2.98 (dd, *J* = 7.8, 5.2 Hz, 2H), 2.52 (dt, *J* = 16.3, 4.9 Hz, 1H), 2.33 (dt, *J* = 16.3, 8.1 Hz, 1H). <sup>13</sup>C NMR (101 MHz, CDCl<sub>3</sub>) δ 203.8, 196.7, 139.5, 138.0, 132.2, 129.6 (d, *J* = 32.4 Hz), 129.2(2C), 128.4, 127.9, 127.1, 125.9, 125.3 (d, *J* = 3.7 Hz) (2C), 121.4 (d, *J* = 272.0 Hz). 47.7, 43.0, 39.5, 37.4, 27.9. HRMS (EI) calc. for C<sub>20</sub>H<sub>15</sub>F<sub>3</sub>O<sub>2</sub> [M<sup>+</sup>]: 344.1024; found: 344.1025. HPLC (Daicel chiralpak AD-3, hexane/*i*-PrOH = 85:15, flow rate 1.0mL / min., λ = 254 nm): tr = 8.90 min. (major), tr = 9.93 min. (minor).

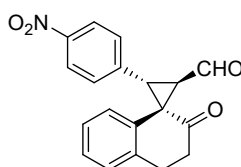

**(1*R*,2*R*,3*S*)-3-(4-nitrophenyl)-2'-oxo-3',4'-dihydro-2'*H*-spiro[cyclopropane-1,1'-naphthalene]-2-carbaldehyde (3j).**

Yellow oil. Isolated yield: 174 mg, 54%. ee 98% d.r. 73/27. <sup>1</sup>H NMR (400 MHz, CDCl<sub>3</sub>) δ 9.45 (d, *J* = 4.2 Hz, 1H), 8.18 (d, *J* = 8.7 Hz, 2H), 7.42 (d, *J* = 8.5 Hz, 2H), 7.31 (s, 4H), 4.09 (d, *J* = 7.7 Hz, 1H), 3.56 (dd, *J* = 7.6, 4.2 Hz, 1H), 3.09 – 3.03 (m, 2H), 2.64 (dt, *J* = 16.3, 4.5 Hz, 1H), 2.48 – 2.38 (m, 1H). <sup>13</sup>C NMR (101 MHz, CDCl<sub>3</sub>) δ 204.0, 196.1, 147.1, 141.8, 139.4, 131.6, 129.8(2C), 128.5, 128.1, 127.1, 125.8, 123.5(2C), 47.4, 43.6, 39.7, 36.5, 27.9. HRMS (EI) calc. for C<sub>19</sub>H<sub>15</sub>NO<sub>4</sub> [M<sup>+</sup>]: 321.1001; found: 321.1003. HPLC (Daicel chiralpak AD-3, hexane/*i*-PrOH = 75:250, flow rate 1.0mL / min., λ = 254 nm): tr = 14.16 min. (major), tr = 19.13 min. (minor).

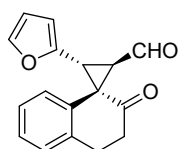

**(1*R*,2*R*,3*R*)-3-(furan-2-yl)-2'-oxo-3',4'-dihydro-2'*H*-spiro[cyclopropane-1,1'-naphthalene]-2-carbaldehyde (3k).**

Yellow oil. Isolated yield: 146 mg, 55%. ee 97% d.r. 79/21. <sup>1</sup>H NMR (400 MHz, CDCl<sub>3</sub>) δ 9.50 (dd, *J* = 3.1, 1.3 Hz, 1H), 7.26 (d, *J* = 1.2 Hz, 1H), 7.21 (d, *J* = 2.2 Hz, 1H), 7.20 – 7.16 (m, 2H), 7.01 (d, *J* = 7.0 Hz, 1H), 6.26 (dd, *J* = 3.1, 1.9 Hz, 1H), 6.12 (d, *J* = 3.2 Hz, 1H), 3.54 – 3.48 (m, 2H), 3.20 – 3.10 (m, 1H), 2.98 – 2.89 (m, 1H), 2.47 – 2.36 (m, 2H). <sup>13</sup>C NMR (101 MHz, CDCl<sub>3</sub>) δ 202.9, 196.8, 148.1, 142.4, 140.1, 132.2, 128.2, 127.8, 126.9, 126.0, 110.7, 108.7, 47.9, 40.3, 38.4, 31.2, 27.9. HRMS (EI) calc. for C<sub>17</sub>H<sub>14</sub>O<sub>3</sub> [M<sup>+</sup>]: 266.0943; found: 266.0944. HPLC (Daicel chiralpak OD-3, hexane/*i*-PrOH = 90:10, flow rate 1.0mL / min., λ = 254 nm): tr = 16.98 min. (minor), tr = 18.66 min. (major).

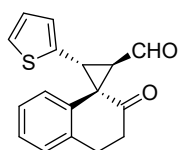

**(1*S*,2*R*,3*R*)-2'-oxo-3-(thiophen-2-yl)-3',4'-dihydro-2'*H*-spiro[cyclopropane-1,1'-naphthalene]-2-carbaldehyde (3l).**

Yellow oil. Isolated yield: 164 mg, 58%. ee 97% d.r. 81/19. <sup>1</sup>H NMR (400 MHz, CDCl<sub>3</sub>) δ 9.66 (dd, *J* = 3.7, 0.8 Hz, 1H), 7.31 – 7.26 (m, 2H), 7.26 – 7.22 (m, 1H), 7.19 (dd, *J* = 5.1, 1.1 Hz, 1H), 7.08 – 7.03 (m, 1H), 6.94 (dd, *J* =

5.1, 3.6 Hz, 1H), 6.88 (d,  $J = 3.5$  Hz, 1H), 3.74 (d,  $J = 3.7$  Hz, 2H), 3.28 – 3.17 (m, 1H), 3.05 – 2.95 (m, 1H), 2.55 – 2.38 (m, 2H).  $^{13}\text{C}$  NMR (101 MHz,  $\text{CDCl}_3$ )  $\delta$  202.6, 196.9, 139.9, 136.4, 132.7, 128.2, 127.8, 127.0(2C), 126.9, 126.0, 125.3, 50.1, 41.9, 38.5, 34.6, 28.1. HRMS (EI) calc. for  $\text{C}_{17}\text{H}_{14}\text{O}_2$  [ $\text{M}^+$ ]: 282.0715; found: 282.0716. HPLC (Daicel chiralpak OD-3, hexane/*i*-PrOH = 90:10, flow rate 1.0mL / min.,  $\lambda = 254$  nm):  $t_r = 26.84$  min. (major),  $t_r = 30.84$  min. (minor).

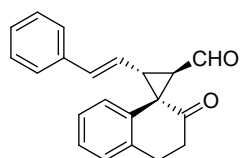

**(1R,2R,3R)-2'-oxo-3-((E)-styryl)-3',4'-dihydro-2'H-spiro[cyclopropane-1,1'-naphthalene]-2-carbaldehyde (3m).**

Yellow oil. Isolated yield: 151 mg, 50%. ee 95% d.r. 70/30.  $^1\text{H}$  NMR (400 MHz,  $\text{CDCl}_3$ )  $\delta$  9.28 (d,  $J = 5.3$  Hz, 1H), 7.38 (d,  $J = 7.6$  Hz, 2H), 7.34 – 7.27 (m, 4H), 7.23 (d,  $J = 5.3$  Hz, 3H), 6.75 (d,  $J = 15.9$  Hz, 1H), 6.47 (dd,  $J = 15.9, 9.0$  Hz, 1H), 3.49 – 3.41 (m, 1H), 3.21 (t,  $J = 6.1$  Hz, 1H), 3.05 (dd,  $J = 8.0, 4.1$  Hz, 2H), 2.70 (dt,  $J = 16.6, 5.0$  Hz, 1H), 2.64 – 2.54 (m, 1H).  $^{13}\text{C}$  NMR (101 MHz,  $\text{CDCl}_3$ )  $\delta$  205.8, 197.0, 139.7, 136.6, 134.2, 132.2, 128.6(2C), 128.2, 127.8, 127.7, 126.9, 126.3(2C), 125.9, 123.6, 47.3, 44.9, 39.5, 37.1, 27.9. HRMS (EI) calc. for  $\text{C}_{21}\text{H}_{18}\text{O}_2$  [ $\text{M}^+$ ]: 302.1307; found: 302.1306. HPLC (Daicel chiralpak AD-3, hexane/*i*-PrOH = 85:15, flow rate 1.0mL / min.,  $\lambda = 254$  nm):  $t_r = 10.58$  min. (major),  $t_r = 11.39$  min. (minor).

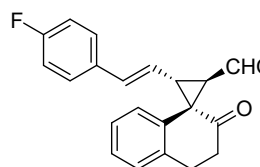

**(1R,2R,3R)-2-((E)-4-fluorostyryl)-2'-oxo-3',4'-dihydro-2'H-spiro[cyclopropane-1,1'-naphthalene]-3-carbaldehyde (3n).**

Yellow oil. Isolated yield: 157 mg, 49%. ee 94% d.r. 72/28.  $^1\text{H}$  NMR (400 MHz,  $\text{CDCl}_3$ )  $\delta$  9.26 (d,  $J = 5.3$  Hz, 1H), 7.37 – 7.31 (m, 3H), 7.27 (d,  $J = 3.8$  Hz, 2H), 7.25 – 7.23 (m, 1H), 6.99 (dd,  $J = 14.4, 5.8$  Hz, 2H), 6.71 (d,  $J = 15.9$  Hz, 1H), 6.42 (dd,  $J = 15.9, 9.0$  Hz, 1H), 3.46 (dd,  $J = 8.9, 6.9$  Hz, 1H), 3.18 (dd,  $J = 6.8, 5.4$  Hz, 1H), 3.05 (dd,  $J = 8.0, 4.9$  Hz, 2H), 2.72 (dt,  $J = 16.6, 4.9$  Hz, 1H), 2.58 (dt,  $J = 16.5, 8.1$  Hz, 1H).  $^{13}\text{C}$  NMR (101 MHz,  $\text{CDCl}_3$ )  $\delta$  208.2, 198.1, 162.4 (d,  $J = 247.9$  Hz), 139.0, 133.7, 132.3 (d,  $J = 3.1$  Hz), 131.5, 128.0, 127.7, 127.6(2C), 127.0, 125.1, 122.5, 115.5 (d,  $J = 21.6$  Hz) (2C), 51.4, 41.0, 40.8, 38.3, 27.5. HRMS (EI) calc. for  $\text{C}_{21}\text{H}_{17}\text{FO}_2$  [ $\text{M}^+$ ]: 320.1213; found: 320.1212. HPLC (Daicel chiralpak AD-3, hexane/*i*-PrOH = 90:10, flow rate 1.0mL / min.,  $\lambda = 254$  nm):  $t_r = 18.10$  min. (major),  $t_r = 31.05$  min. (minor).

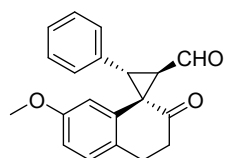

**(1R,2R,3S)-7'-methoxy-2'-oxo-3-phenyl-3',4'-dihydro-2'H-spiro[cyclopropane-1,1'-naphthalene]-2-carbaldehyde (3o).**

Yellow oil. Isolated yield: 202 mg, 69%. ee 97% d.r. 83/17.  $^1\text{H}$  NMR (400 MHz,  $\text{CDCl}_3$ )  $\delta$  9.54 (d,  $J = 4.8$  Hz, 1H), 7.32 – 7.27 (m, 2H), 7.24 (dd,  $J = 13.5, 6.8$  Hz, 3H), 7.17 (d,  $J = 8.2$  Hz, 1H), 6.79 (dt,  $J = 5.7, 2.3$  Hz, 2H), 3.88 (d,  $J = 7.6$  Hz, 1H), 3.80 (s, 3H), 3.64 (dd,  $J = 7.7, 4.8$  Hz, 1H), 3.07 – 2.87 (m, 2H), 2.51 (dt,  $J = 16.1, 5.1$  Hz, 1H), 2.34 (ddd,  $J = 15.9, 9.8, 5.7$  Hz, 1H).  $^{13}\text{C}$  NMR (101 MHz,  $\text{CDCl}_3$ )  $\delta$  203.5, 197.6, 158.5, 134.3, 133.6, 131.5, 129.2, 128.8(2C), 128.3(2C), 127.5, 112.4(2C), 55.5, 48.4, 42.4, 39.7, 39.2, 27.2. HRMS (EI) calc. for  $\text{C}_{20}\text{H}_{18}\text{O}_3$  [ $\text{M}^+$ ]: 306.1256; found: 306.1257. HPLC (Daicel chiralpak AD-3, hexane/*i*-PrOH = 80:20, flow rate 1.0mL / min.,  $\lambda = 254$  nm):  $t_r = 10.85$  min. (major),  $t_r = 13.70$  min. (minor).



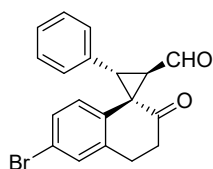

**(1*R*,2*R*,3*S*)-6'-bromo-2'-oxo-3-phenyl-3',4'-dihydro-2'*H*-spiro[cyclopropane-1,1'-naphthalene]-2-carbaldehyde (3p).**

Yellow oil. Isolated yield: 256 mg, 72%. ee 94% d.r 81/19. <sup>1</sup>H NMR (400 MHz, CDCl<sub>3</sub>) δ 9.55 (d, J = 4.3 Hz, 1H), 7.43 (s, 1H), 7.39 (dd, J = 8.3, 2.0 Hz, 1H), 7.28 (dd, J = 13.2, 7.4 Hz, 3H), 7.21 (d, J = 6.9 Hz, 2H), 7.08 (d, J = 8.4 Hz, 1H), 3.85 (d, J = 7.7 Hz, 1H), 3.69 (dd, J = 7.7, 4.4 Hz, 1H), 3.09 – 2.91 (m, 2H), 2.51 (ddd, J = 16.4, 6.0, 4.8 Hz, 1H), 2.34 (ddd, J = 9.8, 7.7, 4.6 Hz, 1H). <sup>13</sup>C NMR (101 MHz, CDCl<sub>3</sub>) δ 203.5, 197.6, 158.5, 134.3, 133.6, 131.5, 129.2, 128.8(2C), 128.3(2C), 127.5(2C), 112.4, 55.5, 48.4, 42.4, 39.7, 39.2, 27.2. HRMS (EI) calc. for C<sub>19</sub>H<sub>15</sub>BrO<sub>2</sub> [M<sup>+</sup>]: 354.0255; found: 354.0252. HPLC (Daicel chiralpak AD-3, hexane/*i*-PrOH = 90:10, flow rate 1.0mL / min., λ = 254 nm): tr = 11.80 min. (major), tr = 12.63 min. (minor).

## 4.4 General Procedure for Synthesis of 5a-5n

### 4.4.1 General Procedure for Synthesis of 5a-5d

General procedure: **1** (1.0 mmol, 1.0 equiv.), DMP (1.0 mmol, 1.0 equiv.), Cat. **I** (0.2 mmol, 0.2 equiv.), were added to 5 mL CH<sub>2</sub>Cl<sub>2</sub> sequentially, stirred at 50°C. When compound **1** was transformed completely in almost two hours, **2** (1.0 mmol, 1.0 equiv.), *p*-TSA (0.2 mmol, 0.2 equiv.) and NBS (1.2 mmol, 1.2 equiv.) were added sequentially to the mixture and stirred at 25°C, and NaOAc (4.0 mmol, 4.0 equiv.) were added to the mixture after half an hour. After the cyclopropylation reaction, the mixture is filtered and the filtrate is concentrated, and 3 mL of MeOH and NaBH<sub>3</sub>CN (3.0 equiv.) were added under an ice bath. After reaction was completed, the mixture was filtered, concentrated under reduce pressure, keeping the bath temperature under 35°C. The residue was purified by silica gel column chromatography using mixture of petrol ether/ethyl acetate. Racemic samples were obtained with racemic version of Cat. **I** (20 mol %).

### 4.4.2 General Procedure for Synthesis of 5e-5n

General procedure: **1** (1.0 mmol, 1.0 equiv.), DMP (1.0 mmol, 1.0 equiv.), Cat. **I** (0.2 mmol, 0.2 equiv.), and 5 mL CH<sub>2</sub>Cl<sub>2</sub> were stirred at 50°C for two hours. Then  $\alpha$ -bromocarbonyl compounds (1.0 mmol, 1.0 equiv.), and NaOAc (2.0 mmol, 2.0 equiv.) were added to the solution sequentially at 25°C. After the cyclopropylation reaction, the mixture is filtered and the filtrate is concentrated, and 3 mL of MeOH and NaBH<sub>3</sub>CN (3.0 equiv.) were added under an ice bath. After reaction was completed, the mixture was filtered, concentrated under reduce pressure, keeping the bath temperature under 35°C. The residue was purified by silica gel column chromatography using mixture of petrol ether/ethyl acetate. Racemic samples were obtained with racemic version of Cat. **I** (20 mol %).

## 4.5 Characterization of the product 5a-5n

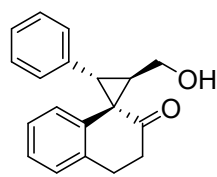

**(1R,2R,3S)-2-(hydroxymethyl)-3-phenyl-3',4'-dihydro-2'H-spiro[cyclopropane-1,1'-naphthalen]-2'-one (5a)**: Isolated yield 167 mg, 60%, ee 97%. d.r. 78/22. White solid; <sup>1</sup>H NMR (400 MHz, CDCl<sub>3</sub>)  $\delta$  7.26 (qd, *J* = 7.7, 6.4, 3.5 Hz, 9H), 3.95 (dd, *J* = 11.9, 5.6 Hz, 1H), 3.69 – 3.56 (m, 1H), 3.30 (d, *J* = 8.0 Hz, 1H), 3.10 – 2.90 (m, 3H), 2.53 (dt, *J* = 15.7, 4.3 Hz, 1H), 2.37 (ddd, *J* = 15.5, 11.7, 5.6 Hz, 1H). <sup>13</sup>C NMR (100 MHz, CDCl<sub>3</sub>)  $\delta$  206.9, 139.7, 135.9, 134.6, 129.1, 128.2, 128.1, 126.9, 126.8, 126.8, 125.3, 60.8, 43.9, 40.2, 38.8, 38.6, 28.3. HRMS (EI) *m/z* Calcd for C<sub>19</sub>H<sub>18</sub>O<sub>2</sub> (M<sup>+</sup>): 278.1307; found:278.1299.

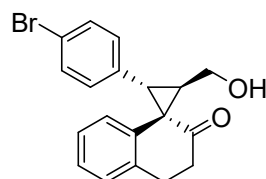

**(1R,2S,3R)-2-(4-bromophenyl)-3-(hydroxymethyl)-3',4'-dihydro-2'H-spiro[cyclopropane-1,1'-naphthalen]-2'-one (5b)**: Isolated yield 193 mg, 54%, ee 92%. d.r. 75/25. Yellow solid; <sup>1</sup>H NMR (400 MHz, CDCl<sub>3</sub>)  $\delta$  7.39 (d, *J* = 8.2 Hz, 2H), 7.30 – 7.23 (m, 4H), 7.12 (d, *J* = 8.2 Hz, 2H), 3.90 (dd, *J* = 12.0, 5.7 Hz, 1H), 3.58 (dd,

$J = 11.8, 9.1$  Hz, 1H), 3.26 (d,  $J = 8.0$  Hz, 1H), 3.12 – 3.03 (m, 1H), 2.97 (dt,  $J = 15.1, 4.7$  Hz, 1H), 2.85 (dd,  $J = 14.2, 8.3$  Hz, 1H), 2.55 (dt,  $J = 15.7, 4.0$  Hz, 1H), 2.45 – 2.33 (m, 1H).  $^{13}\text{C}$  NMR (101 MHz,  $\text{CDCl}_3$ )  $\delta$  206.9, 139.5, 135.0, 134.0, 131.1(2C), 130.8(2C), 128.2, 126.9, 126.8, 125.2, 120.6, 60.5, 43.6, 40.2, 39.2, 37.4, 28.2. HPLC (Daicel chiralpak AD-3, hexane/*i*-PrOH = 75:25, flow rate 1.0 mL / min.,  $\lambda = 254$  nm):  $t_r = 7.27$  min. (major),  $t_r = 11.47$  min. (minor). HRMS (EI)  $m/z$  calc. for  $\text{C}_{19}\text{H}_{17}\text{BrO}_2$  [ $\text{M}^+$ ]: 356.0412; found:356.0407.

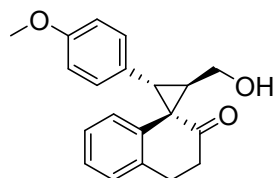

**(1*R*,2*R*,3*S*)-2-(hydroxymethyl)-3-(4-methoxyphenyl)-3',4'-dihydro-2'*H*-spiro[cyclopropane-1,1'-naphthalen]-2'-one**

**(5c):** Isolated yield 188 mg, 61%, ee 97% d.r. 72/28. Yellow solid;  $^1\text{H}$  NMR (400 MHz,  $\text{CDCl}_3$ )  $\delta$  7.27 (dd,  $J = 7.8, 3.4$  Hz,

4H), 7.17 (d,  $J = 8.5$  Hz, 2H), 6.82 (d,  $J = 8.6$  Hz, 2H), 3.98 (dd,  $J = 11.9, 5.6$  Hz, 1H), 3.78 (s, 4H), 3.67 (dd,  $J = 11.9, 9.2$  Hz, 1H), 3.25 (d,  $J = 8.0$  Hz, 1H), 2.99 (dtd,  $J = 28.6, 10.1, 8.5, 5.0$  Hz, 3H), 2.53 (dt,  $J = 15.6, 4.4$  Hz, 1H), 2.44 – 2.33 (m, 1H).  $^{13}\text{C}$  NMR (100 MHz,  $\text{CDCl}_3$ )  $\delta$  206.7, 158.5, 139.6, 134.8, 130.1, 128.2, 127.7, 126.8, 126.7, 125.2, 113.6, 60.8, 55.3, 43.9, 40.2, 38.7, 28.4. HRMS (EI)  $m/z$  calcd for  $\text{C}_{20}\text{H}_{20}\text{O}_3$  ( $\text{M}^+$ ): 308.1412; found:308.1402.

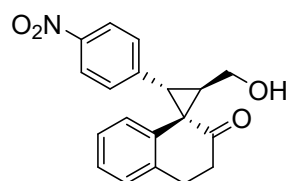

**(1*R*,2*R*,3*S*)-2-(hydroxymethyl)-3-(4-nitrophenyl)-3',4'-dihydro-2'*H*-spiro[cyclopropane-1,1'-naphthalen]-2'-one**

**(5d):** Isolated yield 168 mg, 52%, ee 98% d.r. 73/27. Yellow solid;  $^1\text{H}$  NMR (400 MHz,  $\text{CDCl}_3$ )  $\delta$  8.14 (d,  $J = 8.6$  Hz, 2H),

7.42 (d,  $J = 8.6$  Hz, 2H), 7.33 – 7.25 (m, 4H), 3.90 (dd,  $J = 12.0, 5.6$  Hz, 1H), 3.56 (dd,  $J = 12.0, 8.9$  Hz, 1H), 3.42 (d,  $J = 7.9$  Hz, 1H), 3.20 – 3.08 (m, 1H), 3.04 – 2.94 (m, 1H), 2.84 (td,  $J = 8.3, 5.7$  Hz, 1H), 2.60 (dt,  $J = 15.9, 3.7$  Hz, 1H), 2.48 – 2.36 (m, 1H).  $^{13}\text{C}$  NMR (100 MHz,  $\text{CDCl}_3$ )  $\delta$  207.3, 146.7, 144.5, 139.6, 133.3, 130.0, 128.4, 127.3, 126.9, 125.3, 123.4, 60.3, 43.8, 40.2, 36.2, 28.1, 27.0. HRMS (EI)  $m/z$  calcd for  $\text{C}_{19}\text{H}_{17}\text{NO}_4$  ( $\text{M}^+$ ): 323.1158; found:323.1149.

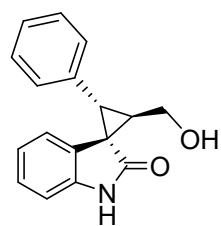

**(1*R*,2*R*,3*S*)-2-(hydroxymethyl)-3-phenylspiro[cyclopropane-1,3'-indolin]-2'-one**

**(5e):** Isolated yield 191 mg, 72%, ee 99% d.r. 90/10. White solid;  $^1\text{H}$  NMR (400 MHz,  $\text{CDCl}_3$ )  $\delta$  9.03 (s, 1H), 7.26 – 7.21 (m, 4H), 7.21 – 7.16 (m, 1H), 7.12 – 7.07 (m, 1H), 7.02 (d,  $J = 7.3$  Hz, 1H), 6.96 (q,  $J = 7.1, 5.9$  Hz, 1H), 6.61 (d,  $J =$

7.7 Hz, 1H), 4.23 – 4.14 (m, 1H), 3.88 (dd,  $J = 12.0, 8.9$  Hz, 1H), 3.28 (s, 1H), 3.09 (d,  $J = 8.5$  Hz, 1H), 2.88 (td,  $J = 8.6, 5.7$  Hz, 1H).  $^{13}\text{C}$  NMR (100 MHz,  $\text{CDCl}_3$ )  $\delta$  175.6, 141.3, 134.3, 129.4, 128.3, 128.1, 127.4, 127.0, 121.9, 120.5, 110.4, 60.5, 42.0, 38.7, 38.0. HPLC: Chiralpak AD-3, *i*-PrOH/hexane = 25/75, flow rate = 1.0 mL/min,  $\lambda = 254$  nm;  $t_{\text{major}} = 11.5$  min and  $t_{\text{minor}} = 10.22$  min.

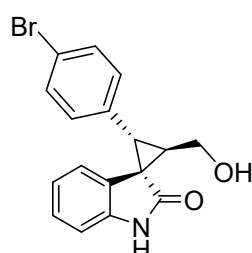

**(1*R*,2*S*,3*R*)-2-(4-bromophenyl)-3-**

**(hydroxymethyl)spiro[cyclopropane-1,3'-indolin]-2'-one**

**(5f):** Isolated yield 255 mg, 74%, ee 97% d.r. 88/12. Light yellow

solid;  $^1\text{H}$  NMR (400 MHz,  $\text{CDCl}_3$ )  $\delta$  9.00 (s, 1H), 7.34 (d,  $J = 8.4$  Hz, 2H), 7.20 – 7.07 (m, 3H), 7.05 – 6.95 (m, 2H), 6.58 (d,  $J = 7.7$  Hz, 1H), 4.21 – 4.13 (m, 1H), 3.89 (dd,  $J = 11.8, 9.0$  Hz, 1H), 3.16 (s, 1H), 3.03 (d,  $J = 8.4$  Hz, 1H), 2.81 (td,  $J = 8.5, 5.8$  Hz, 1H).  $^{13}\text{C}$  NMR (100 MHz,  $\text{CDCl}_3$ )  $\delta$  175.7, 141.3, 133.4, 131.2, 131.1, 127.9, 127.3, 122.0, 121.3, 120.6, 110.5, 60.23, 41.1, 38.5, 38.0. HPLC: Chiralpak AD-3, *i*-PrOH/hexane = 25/75, flow rate = 1.0 mL/min,  $\lambda = 254$  nm;  $t_{\text{major}} = 12.62$  min and  $t_{\text{minor}} = 13.54$  min.

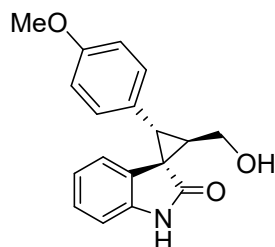

**(1*R*,2*R*,3*S*)-2-(hydroxymethyl)-3-(4-methoxyphenyl)spiro[cyclopropane-1,3'-indolin]-2'-one**

**(5g):** Isolated yield 186 mg, 63%, ee 99% d.r. 80/20. Light yellow solid;  $^1\text{H}$  NMR (400 MHz,  $\text{CDCl}_3$ )  $\delta$  8.14 (s, 1H), 7.25 – 7.17 (m, 3H), 7.11 (t,  $J = 7.8$  Hz, 1H), 7.07 – 7.01 (m, 1H), 6.83 – 6.78 (m, 3H), 4.26 (dt,  $J = 12.3, 5.9$  Hz, 1H), 4.01 (ddd,  $J = 12.5, 8.8, 4.8$  Hz, 1H), 3.76 (s, 3H), 3.14 (d,  $J = 8.4$  Hz, 1H), 2.91 (td,  $J = 8.6, 5.8$  Hz, 1H).  $^{13}\text{C}$  NMR (100 MHz,  $\text{CDCl}_3$ )  $\delta$  175.0, 158.9, 141.1, 130.4, 127.1, 126.0, 122.1, 120.6, 113.6, 110.1, 60.8, 55.3, 42.0, 38.9, 37.9. HPLC: Chiralpak AD-3, *i*-PrOH/hexane = 25/75, flow rate = 1.0 mL/min,  $\lambda = 254$  nm;  $t_{\text{major}} = 18.59$  min and  $t_{\text{minor}} = 21.37$  min.

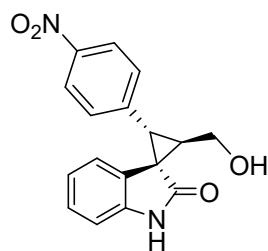

**(1*R*,2*R*,3*S*)-2-(hydroxymethyl)-3-(4-nitrophenyl)spiro[cyclopropane-1,3'-indolin]-2'-one** **(5h):**

Isolated yield 186 mg, 60%, ee 97% d.r. 85/15. Yellow solid;  $^1\text{H}$  NMR (400 MHz,  $\text{CDCl}_3$ )  $\delta$  8.26 (s, 1H), 8.12 (d,  $J = 8.7$  Hz, 2H), 7.46 (d,  $J = 8.6$  Hz, 2H), 7.22 (t,  $J = 7.7$  Hz, 1H), 7.15 (d,  $J = 7.4$  Hz, 1H), 7.06 (t,  $J = 7.5$  Hz, 1H), 6.76 (d,  $J = 7.7$  Hz, 1H), 4.27 (dt,  $J = 11.8, 5.8$  Hz, 1H), 4.10 – 4.01 (m, 1H), 3.21 (d,  $J = 8.4$  Hz, 1H), 2.93 (td,  $J = 8.4, 5.8$  Hz, 1H).  $^{13}\text{C}$  NMR (100 MHz,  $\text{CDCl}_3$ )  $\delta$  174.7, 147.2, 142.0, 141.2, 130.3, 127.7, 127.3, 123.3, 122.4, 120.9, 110.4, 60.2, 40.6, 38.4, 38.4. HPLC: Chiralpak IC, *i*-PrOH/hexane = 40/60, flow rate = 0.5 mL/min,  $\lambda = 254$  nm;  $t_{\text{major}} = 15.57$  min and  $t_{\text{minor}} = 20.50$  min.

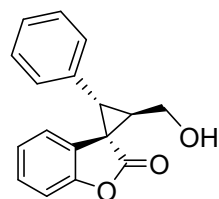

**(2'*R*,3*R*,3'*S*)-2'-(hydroxymethyl)-3'-phenyl-2*H*-**

**spiro[benzofuran-3,1'-cyclopropan]-2-one** **(5i):** Isolated yield 144 mg, 54%, ee 99% d.r. 72/28. White solid;  $^1\text{H}$  NMR (400 MHz,  $\text{CDCl}_3$ )  $\delta$  7.35 – 7.27 (m, 6H), 7.22 – 7.15 (m, 3H), 4.21 (d,  $J = 12.0$  Hz, 1H), 4.04 (dd,  $J = 11.9, 8.4$  Hz, 1H), 3.27 (d,  $J = 8.6$  Hz, 1H), 2.97 (td,  $J = 8.3, 5.7$  Hz, 1H).  $^{13}\text{C}$  NMR (100 MHz,  $\text{CDCl}_3$ )  $\delta$  173.3, 153.9, 132.9, 129.2, 128.4, 128.0, 126.6, 124.1, 120.9, 111.0, 60.1, 43.0, 39.5, 35.7. HPLC: Chiralpak AD-3, *i*-PrOH/hexane = 20/80, flow rate = 1.0 mL/min,  $\lambda = 254$  nm;  $t_{\text{major}} = 11.14$  min and  $t_{\text{minor}} = 10.65$  min. HRMS (EI)  $m/z$  calcd for  $\text{C}_{17}\text{H}_{14}\text{O}_3$  ( $\text{M}^+$ ): 266.0943; found: 266.0937.

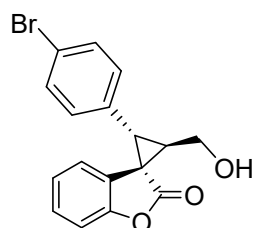

**(2'*S*,3*R*,3'*R*)-2'-(4-bromophenyl)-3'-(hydroxymethyl)-2*H*-**

**spiro[benzofuran-3,1'-cyclopropan]-2-one (5j):** Isolated yield 200 mg, 58%, ee 97% d.r. 85/15. Yellow solid; <sup>1</sup>H NMR (400 MHz, CDCl<sub>3</sub>) δ 7.44 (d, *J* = 8.4 Hz, 2H), 7.33 (ddd, *J* = 8.8, 5.9, 3.2 Hz, 1H), 7.22 – 7.15 (m, 5H), 4.25 – 4.17 (m, 1H), 4.10 – 4.01 (m, 1H), 3.21 (d, *J* = 8.6 Hz, 1H), 2.96 – 2.89 (m, 1H). <sup>13</sup>C NMR (100 MHz, CDCl<sub>3</sub>) δ 173.2, 154.0, 132.0, 131.5, 130.9, 128.2, 126.2, 124.2, 122.0, 121.0, 111.2, 60.0, 42.1, 39.3, 35.7. HPLC: Chiralpak AD-3, *i*-PrOH/hexane = 20/80, flow rate = 1.0 mL/min, λ = 254 nm; *t*<sub>major</sub> = 15.65 min and *t*<sub>minor</sub> = 11.45 min. HRMS (EI) *m/z* calcd for C<sub>17</sub>H<sub>13</sub>BrO<sub>3</sub> (M<sup>+</sup>): 344.0048; found:344.0040.

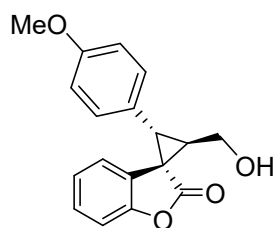

**(2'*R*,3*R*,3'*S*)-2'-(hydroxymethyl)-3'-(4-methoxyphenyl)-2*H*-spiro[benzofuran-3,1'-cyclopropan]-2-one (5k):** Isolated yield 145 mg, 49%, ee 98% d.r. 70/30. Light yellow solid; <sup>1</sup>H NMR (400 MHz, CDCl<sub>3</sub>) δ 7.32 (ddd, *J* = 8.1, 6.1, 3.0 Hz, 1H), 7.25 – 7.14 (m, 5H), 6.85 (d, *J* = 8.7 Hz, 2H), 4.23 (dd, *J* = 11.4, 4.8 Hz, 1H), 4.06 (dd, *J* = 12.1, 8.2 Hz, 1H), 3.79 (s, 3H), 3.23 (d, *J* = 8.6 Hz, 1H), 2.96 (td, *J* = 8.4, 5.7 Hz, 1H). <sup>13</sup>C NMR (100 MHz, CDCl<sub>3</sub>) δ 173.2, 159.3, 153.9, 130.3, 127.9, 126.7, 124.8, 124.1, 120.8, 113.8, 111.1, 60.3, 55.4, 42.9, 39.7, 35.7. HPLC: Chiralpak AD-3, *i*-PrOH/hexane = 20/80, flow rate = 1.0 mL/min, λ = 254 nm; *t*<sub>major</sub> = 18.08 min and *t*<sub>minor</sub> = 16.38 min. HRMS (EI) *m/z* calcd for C<sub>18</sub>H<sub>16</sub>O<sub>4</sub> (M<sup>+</sup>): 296.1049; found:296.1042.

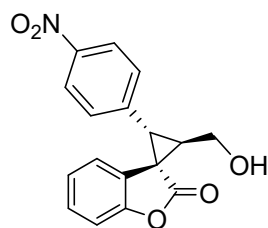

**(2'*R*,3*R*,3'*S*)-2'-(hydroxymethyl)-3'-(4-nitrophenyl)-2*H*-spiro[benzofuran-3,1'-cyclopropan]-2-one (5l):** Isolated yield 143 mg, 46%, ee 98% d.r. 80/20. Yellow solid; <sup>1</sup>H NMR (400 MHz, CDCl<sub>3</sub>) δ 8.08 (d, *J* = 8.6 Hz, 2H), 7.40 (d, *J* = 8.5 Hz, 2H), 7.27 (t, *J* = 7.6 Hz, 1H), 7.19 – 7.07 (m, 3H), 4.14 (dd, *J* = 11.2, 4.4 Hz, 1H), 4.03 (dd, *J* = 13.3, 6.9 Hz, 1H), 3.26 (d, *J* = 8.6 Hz, 1H), 2.90 (q, *J* = 7.9 Hz, 1H). <sup>13</sup>C NMR (100 MHz, CDCl<sub>3</sub>) δ 173.1, 154.0, 147.4, 140.7, 130.3, 128.6, 125.6, 124.4, 121.2, 111.3, 59.6, 41.3, 39.3, 36.2. HPLC: Chiralpak IC, *i*-PrOH/hexane = 15/85, flow rate = 1.0 mL/min, λ = 254 nm; *t*<sub>major</sub> = 54.32 min and *t*<sub>minor</sub> = 28.94 min. HRMS (EI) *m/z* calcd for C<sub>17</sub>H<sub>13</sub>NO<sub>5</sub> (M<sup>+</sup>): 311.0794; found:311.0784.

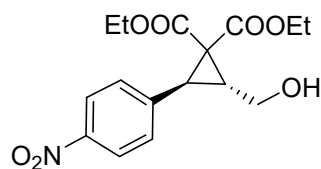

**Diethyl (2*R*,3*S*)-2-(hydroxymethyl)-3-(4-nitrophenyl)cyclopropane-1,1-dicarboxylate (5m):** Isolated yield 253 mg, 75%, ee 93% d.r. 95/5. Yellow oil; <sup>1</sup>H NMR (400 MHz, CDCl<sub>3</sub>) δ 8.13 (d, *J* = 8.5 Hz, 2H), 7.40 (d, *J* = 8.5 Hz, 2H), 4.37 – 4.22 (m, 2H), 4.00 (dd, *J* = 12.0, 5.6 Hz, 1H), 3.97 – 3.84 (m, 2H), 3.67 (dd, *J* = 11.9, 8.2 Hz, 1H), 3.22 (d, *J* = 8.0 Hz, 1H), 2.85 (q, *J* = 7.9 Hz, 1H), 1.32 (t, *J* = 7.1 Hz, 3H), 0.96 (t, *J* = 7.1 Hz, 3H). <sup>13</sup>C NMR (100 MHz, CDCl<sub>3</sub>) δ 167.4, 166.0, 147.0, 141.9, 129.5, 123.2, 62.2, 61.6, 60.2, 42.1, 33.9, 32.2, 13.9, 13.6. HPLC: Chiralpak IC, *i*-PrOH/hexane = 10/90, flow rate = 1.0 mL/min, λ = 254 nm; *t*<sub>major</sub> = 30.98 min and *t*<sub>minor</sub> = 29.08 min.

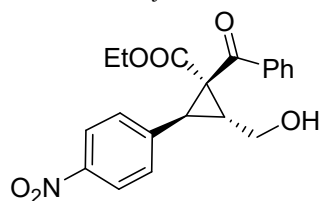

**Ethyl (1*S*,2*R*,3*S*)-1-benzoyl-2-(hydroxymethyl)-3-(4-nitrophenyl)cyclopropane-1-carboxylate (5n):** Isolated yield 225 mg, 61%, ee 92% d.r. 90/10. Light yellow solid; <sup>1</sup>H NMR (400 MHz, CDCl<sub>3</sub>) δ 8.00 (d, *J* = 8.8 Hz, 2H), 7.67 (d, *J* = 8.4 Hz, 2H), 7.45 (t, *J* = 7.4 Hz, 1H), 7.36 – 7.28 (m, 4H), 4.17 – 3.99 (m, 3H), 3.84 (dd, *J* = 11.4, 8.6 Hz, 1H), 3.59 (d, *J* = 7.9 Hz, 1H), 3.21 (td, *J* = 8.1, 5.9 Hz, 1H), 0.90 (t, *J* = 7.1 Hz, 3H). <sup>13</sup>C NMR (100 MHz, CDCl<sub>3</sub>) δ 191.5, 168.8, 147.1, 141.8, 136.8, 133.4, 128.9, 128.7, 128.1, 123.6, 62.4, 60.0, 47.6, 36.3, 31.7, 13.7. HPLC: Chiralpak IC, *i*-PrOH/hexane = 15/85, flow rate = 1.0 mL/min, λ = 254 nm; *t*<sub>major</sub> = 20.95 min and *t*<sub>minor</sub> = 17.66 min.

## 5. X-ray data for compound **5b**

The absolute configuration of the products was determined by single crystal X-ray diffraction of **5b**. Crystals of compound **5b** were obtained by slow evaporation of the mixture (methyl tert-butyl ether/chloroform 8:1) at 4 °C.

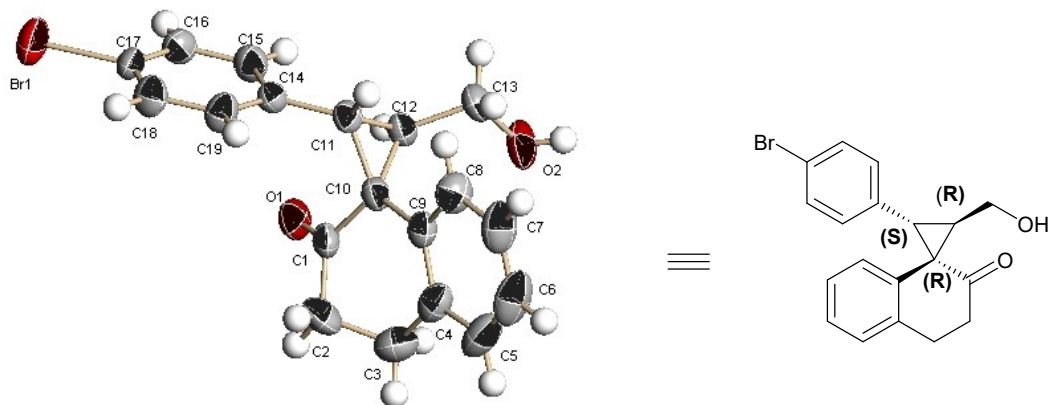

|                                 |                                                                                                 |
|---------------------------------|-------------------------------------------------------------------------------------------------|
| Identification code             | cd15018                                                                                         |
| Empirical formula               | C <sub>19</sub> H <sub>17</sub> Br O <sub>2</sub>                                               |
| Formula weight                  | 357.23                                                                                          |
| Temperature                     | 293(2) K                                                                                        |
| Wavelength                      | 0.71073 Å                                                                                       |
| Crystal system                  | Orthorhombic                                                                                    |
| Space group                     | P 21 21 21                                                                                      |
| Unit cell dimensions            | a = 7.1586(8) Å      α = 90°.<br>b = 11.9651(14) Å    β = 90°.<br>c = 18.845(2) Å      γ = 90°. |
| Volume                          | 1614.2(3) Å <sup>3</sup>                                                                        |
| Z                               | 4                                                                                               |
| Density (calculated)            | 1.470 Mg/m <sup>3</sup>                                                                         |
| Absorption coefficient          | 2.551 mm <sup>-1</sup>                                                                          |
| F(000)                          | 728                                                                                             |
| Crystal size                    | 0.210 x 0.170 x 0.120 mm <sup>3</sup>                                                           |
| Theta range for data collection | 2.016 to 25.489°.                                                                               |
| Index ranges                    | -8 ≤ h ≤ 8, -14 ≤ k ≤ 13, -18 ≤ l ≤ 22                                                          |
| Reflections collected           | 9465                                                                                            |
| Independent reflections         | 3005 [R(int) = 0.0622]                                                                          |

|                                   |                                             |
|-----------------------------------|---------------------------------------------|
| Completeness to theta = 25.242°   | 100.0 %                                     |
| Absorption correction             | Semi-empirical from equivalents             |
| Max. and min. transmission        | 0.7456 and 0.4904                           |
| Refinement method                 | Full-matrix least-squares on F <sup>2</sup> |
| Data / restraints / parameters    | 3005 / 0 / 200                              |
| Goodness-of-fit on F <sup>2</sup> | 1.010                                       |
| Final R indices [I>2sigma(I)]     | R1 = 0.0446, wR2 = 0.0886                   |
| R indices (all data)              | R1 = 0.0708, wR2 = 0.0981                   |
| Absolute structure parameter      | 0.011(12)                                   |
| Extinction coefficient            | n/a                                         |
| Largest diff. peak and hole       | 0.341 and -0.336 e.Å <sup>-3</sup>          |



## 6. NMR spectrum

3c

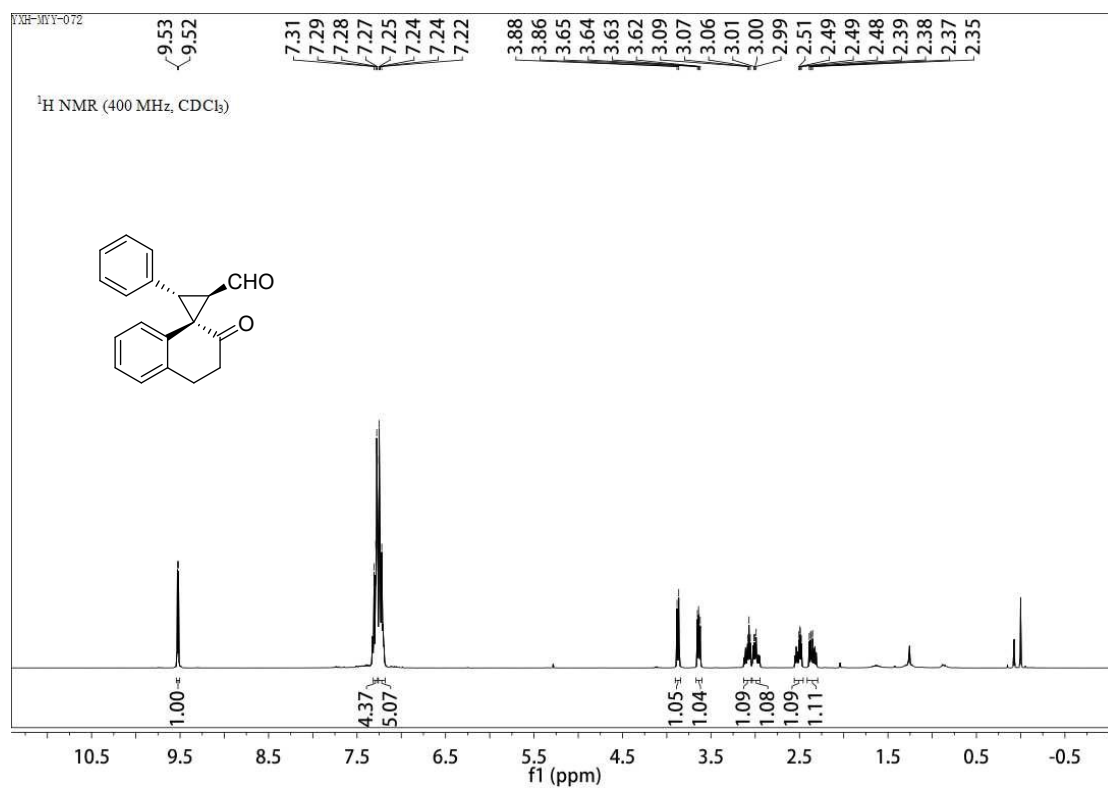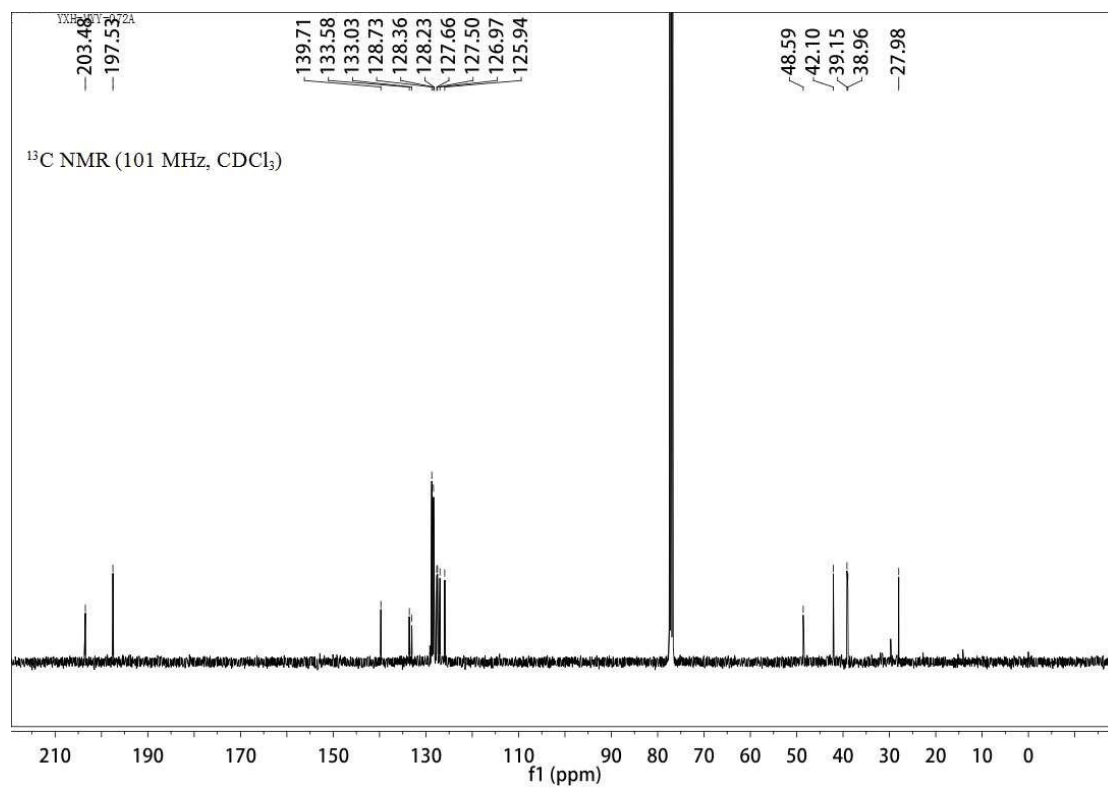

3b

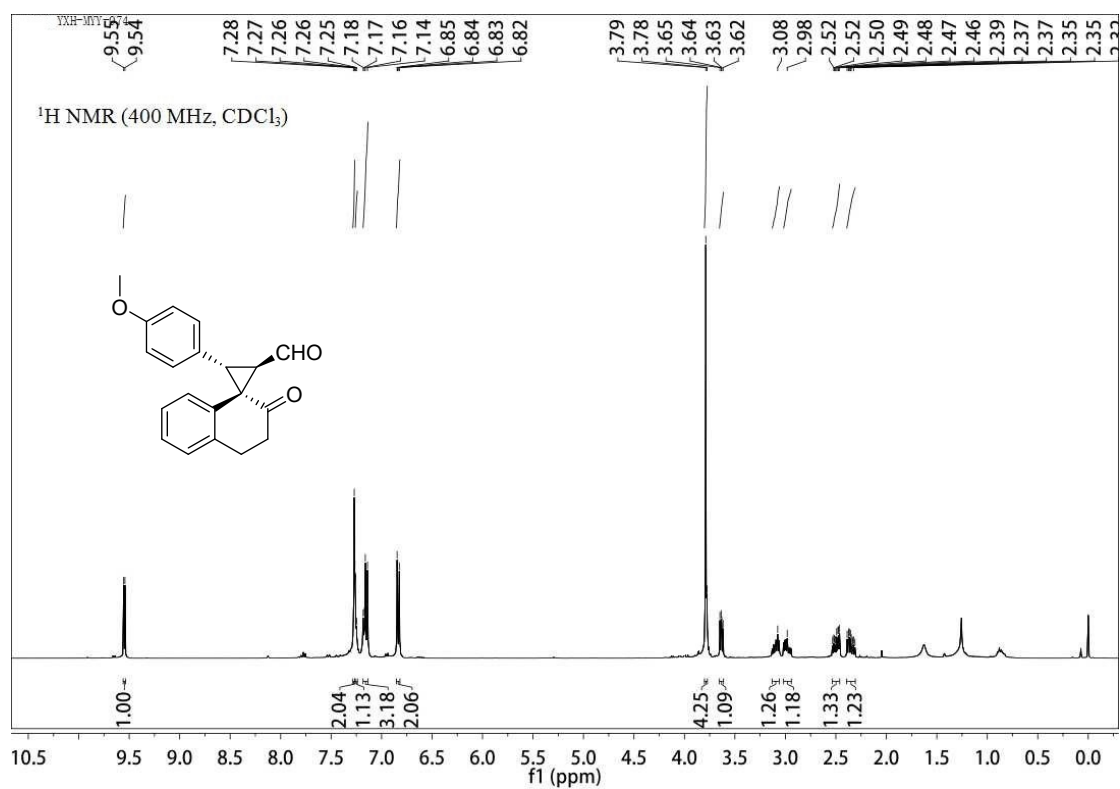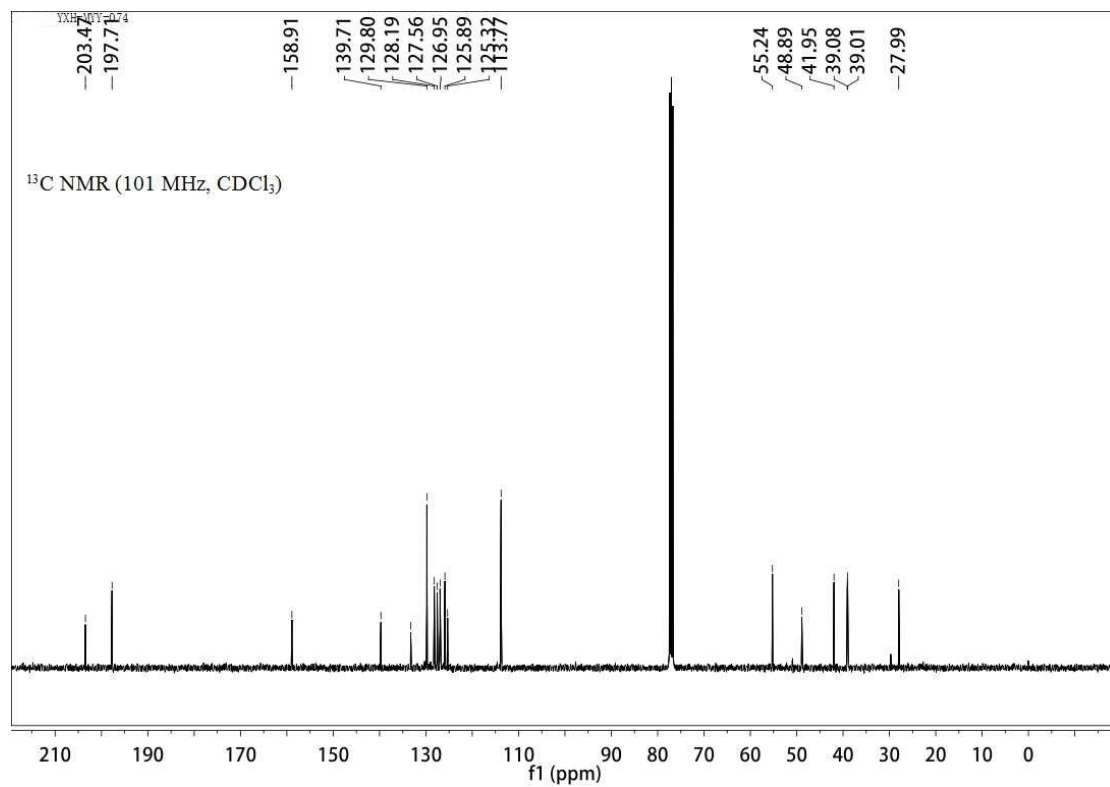

3c

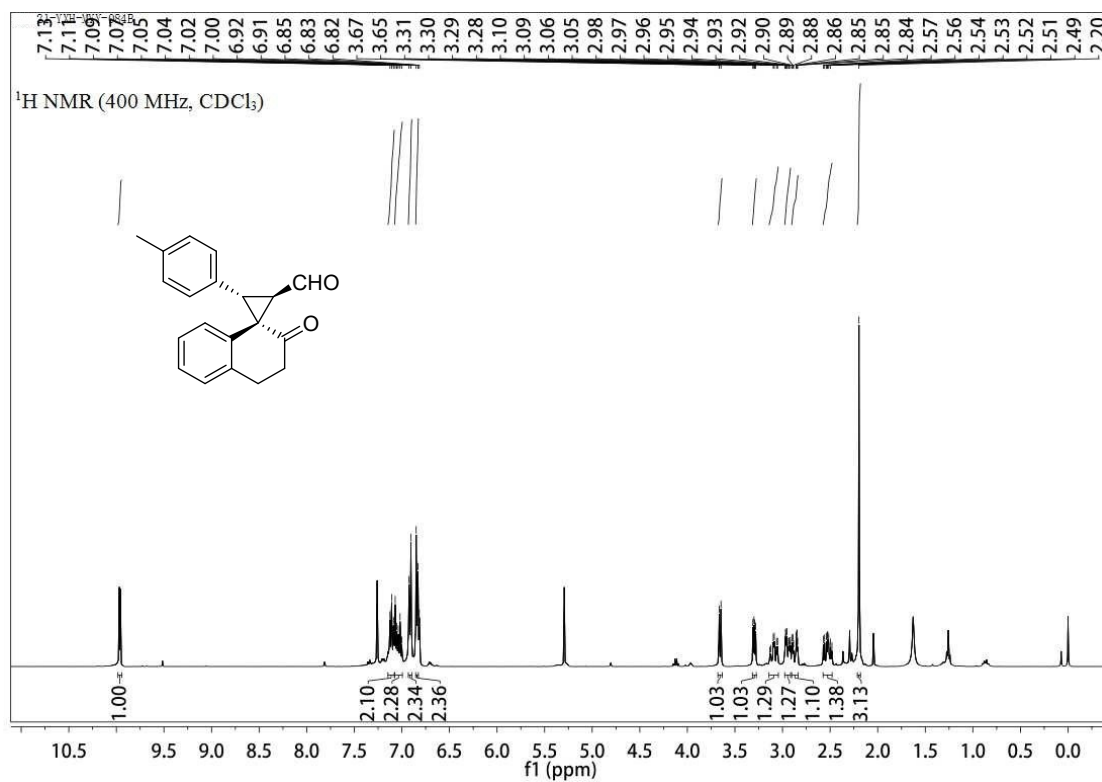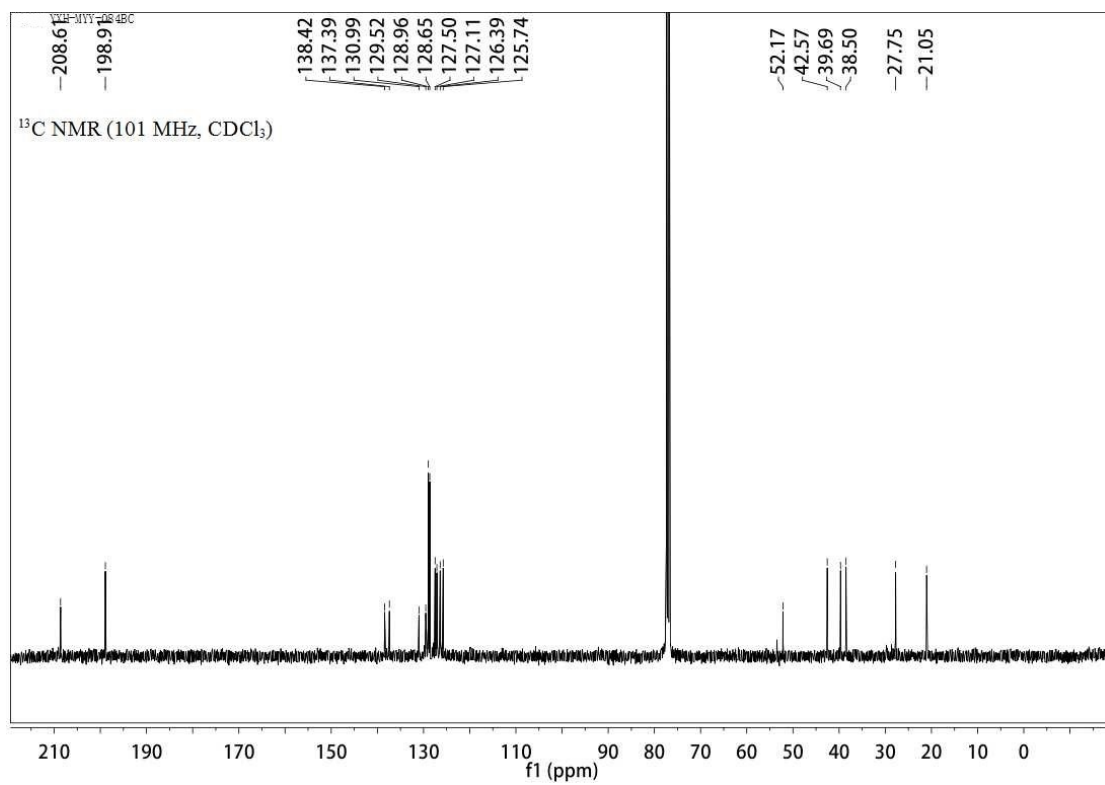

3d

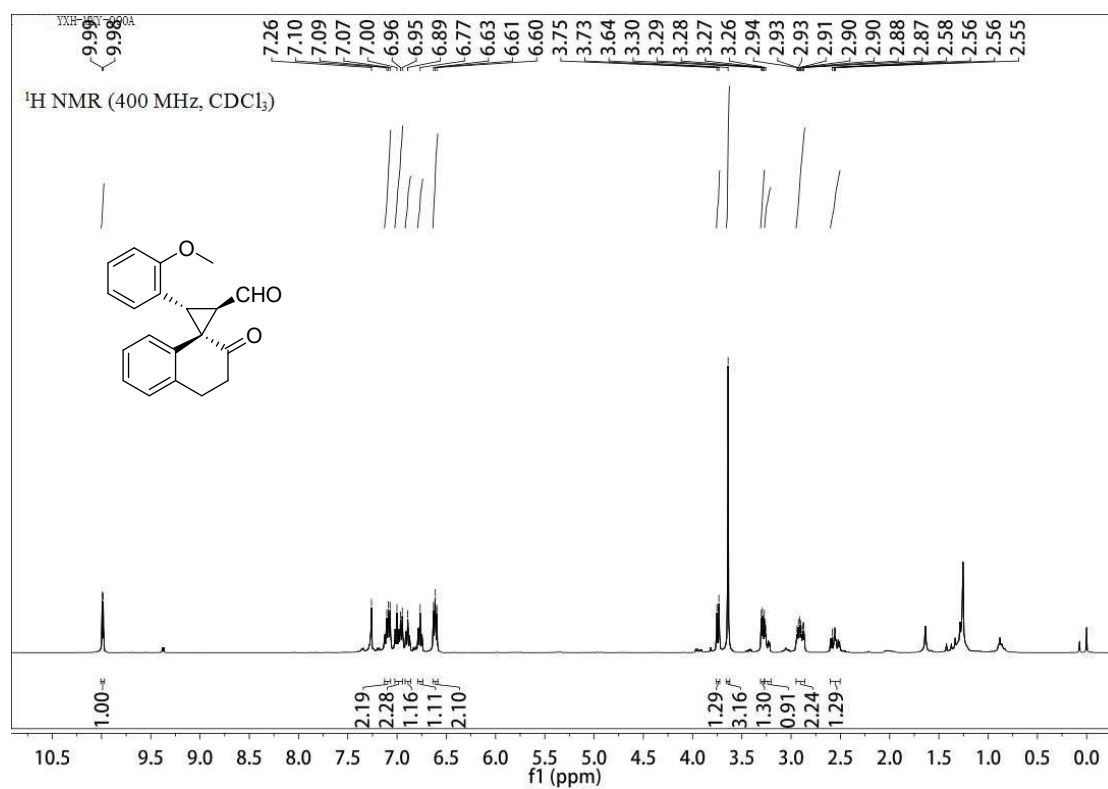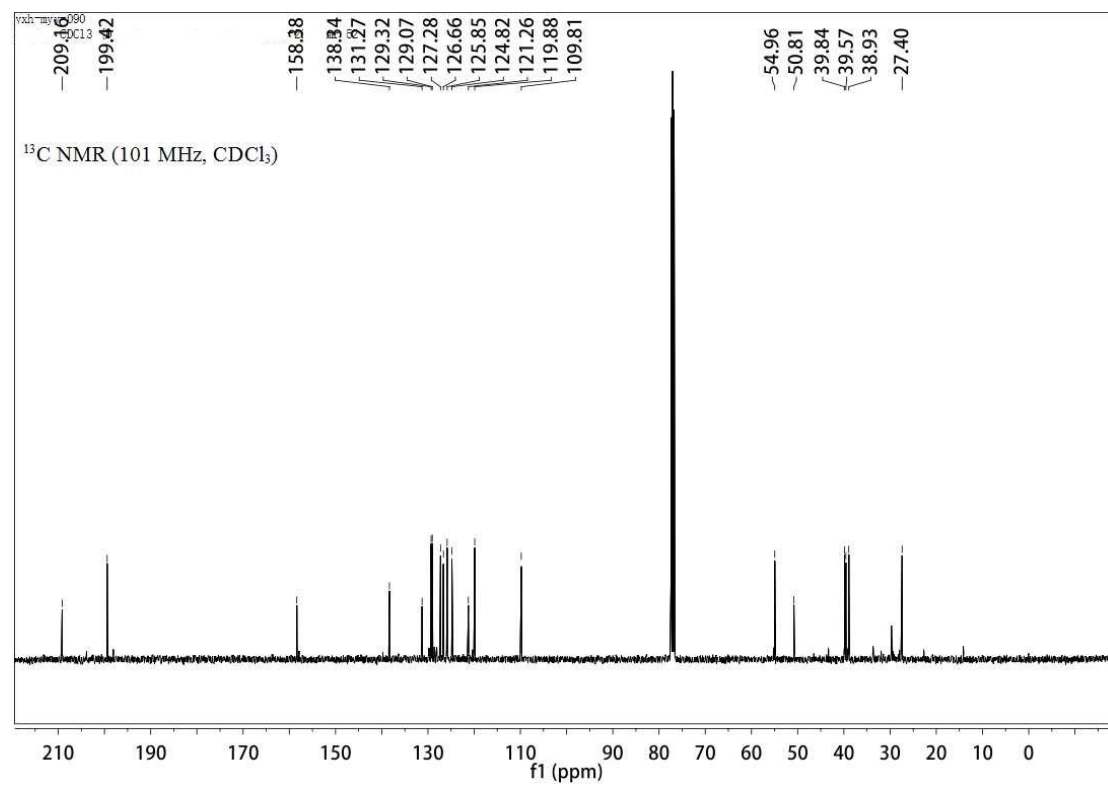

3e

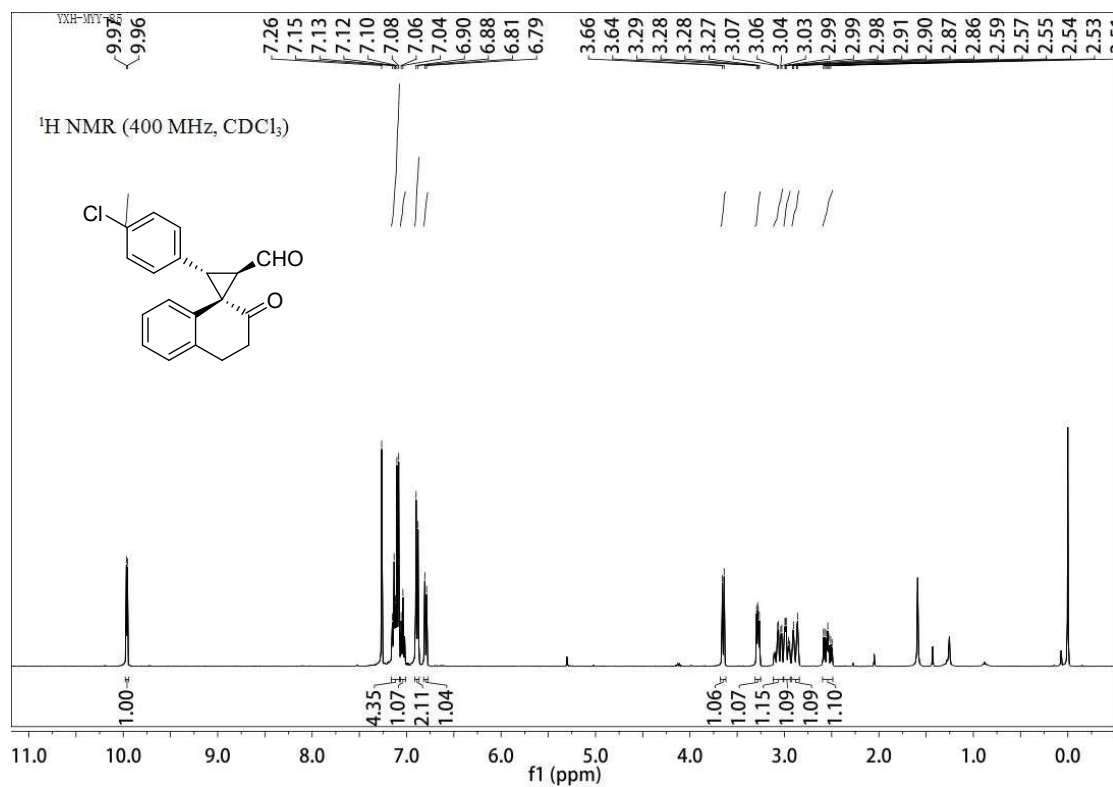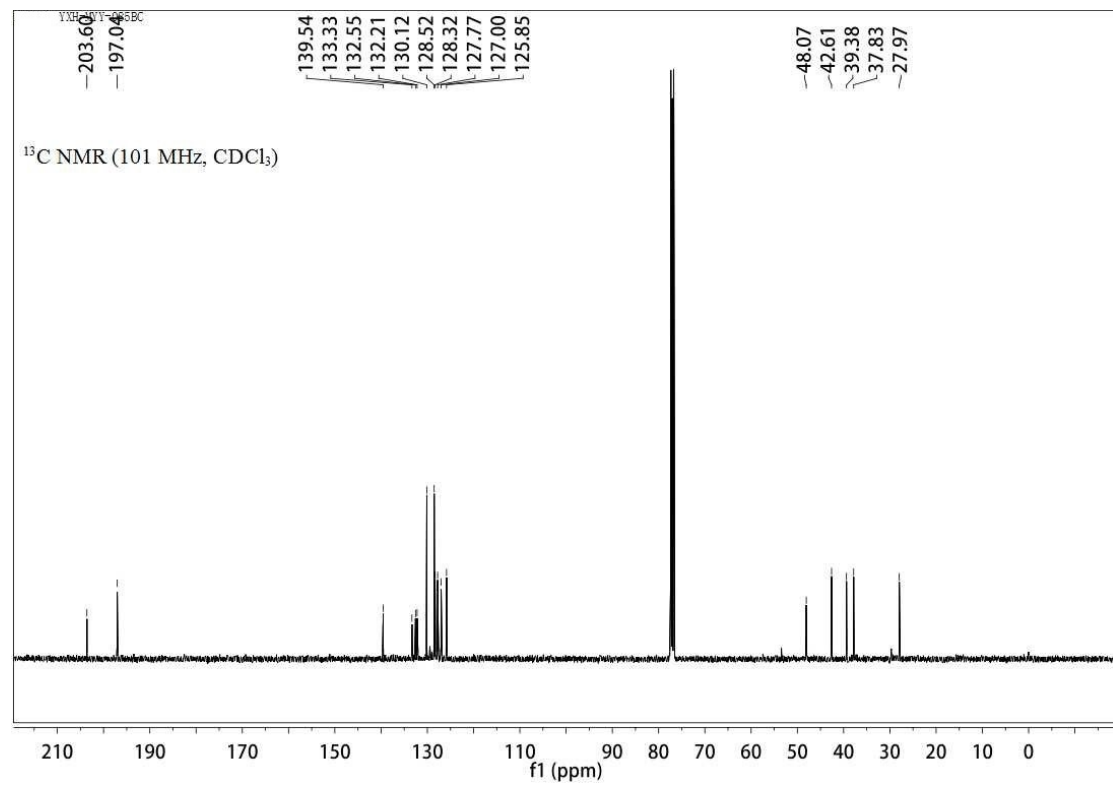

3f

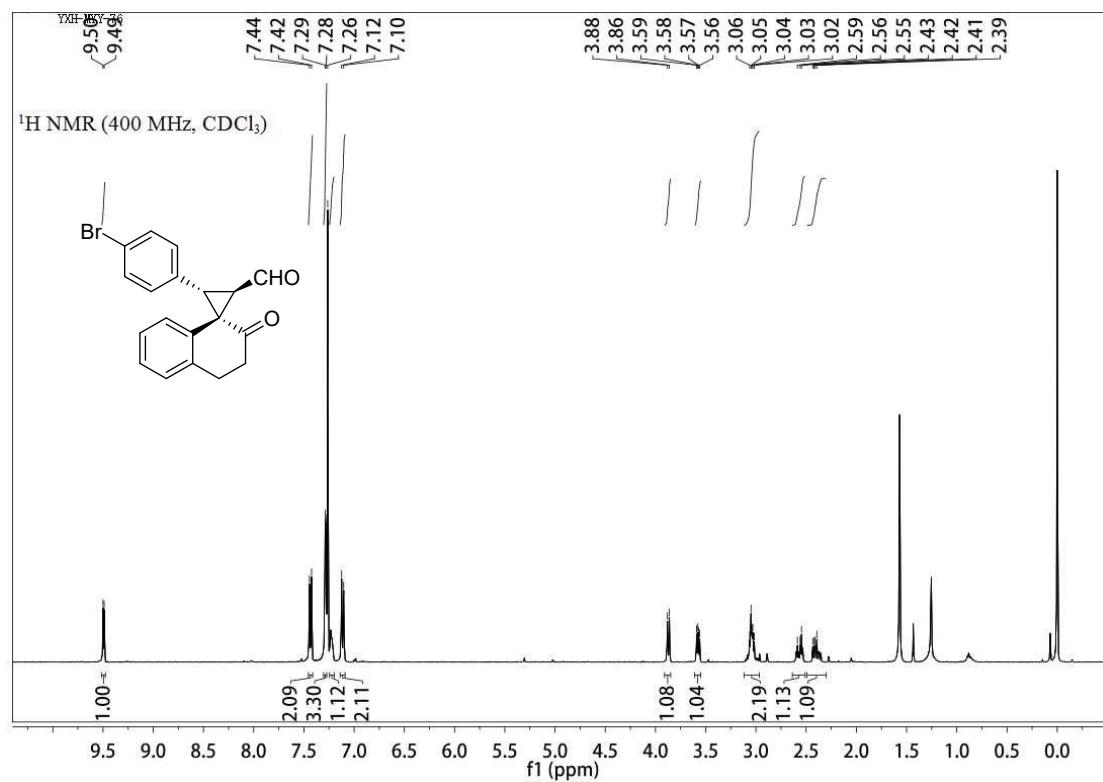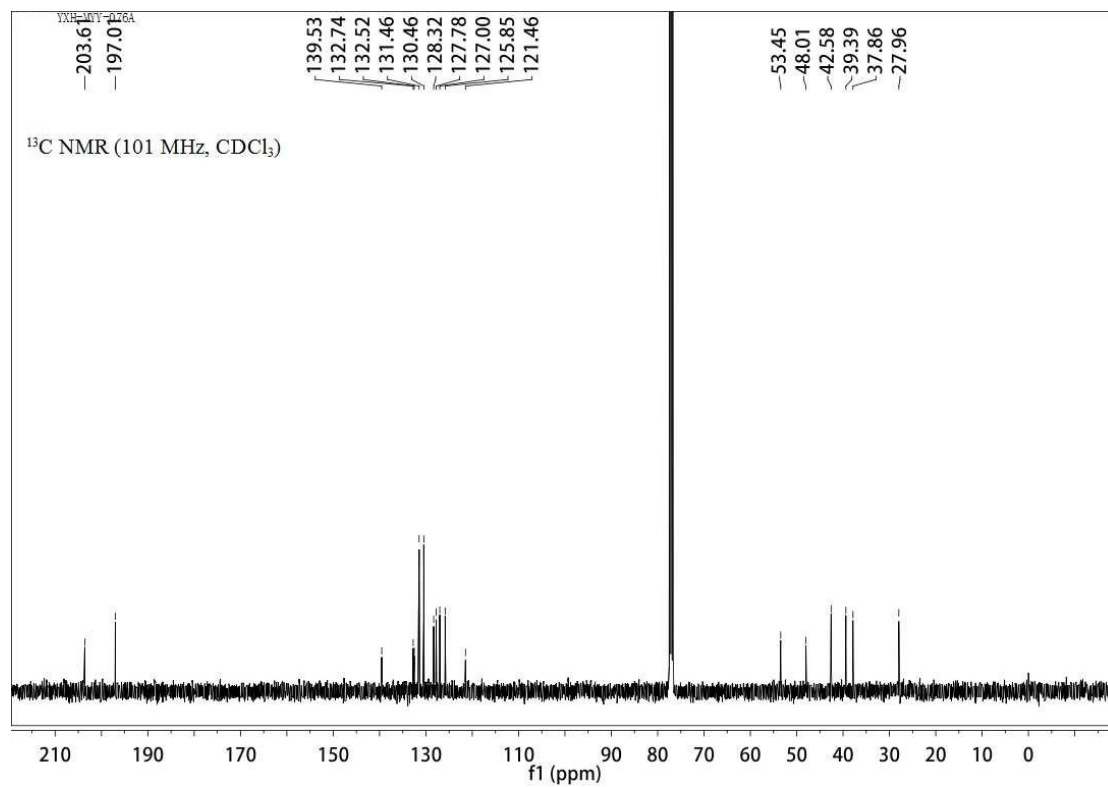

3g

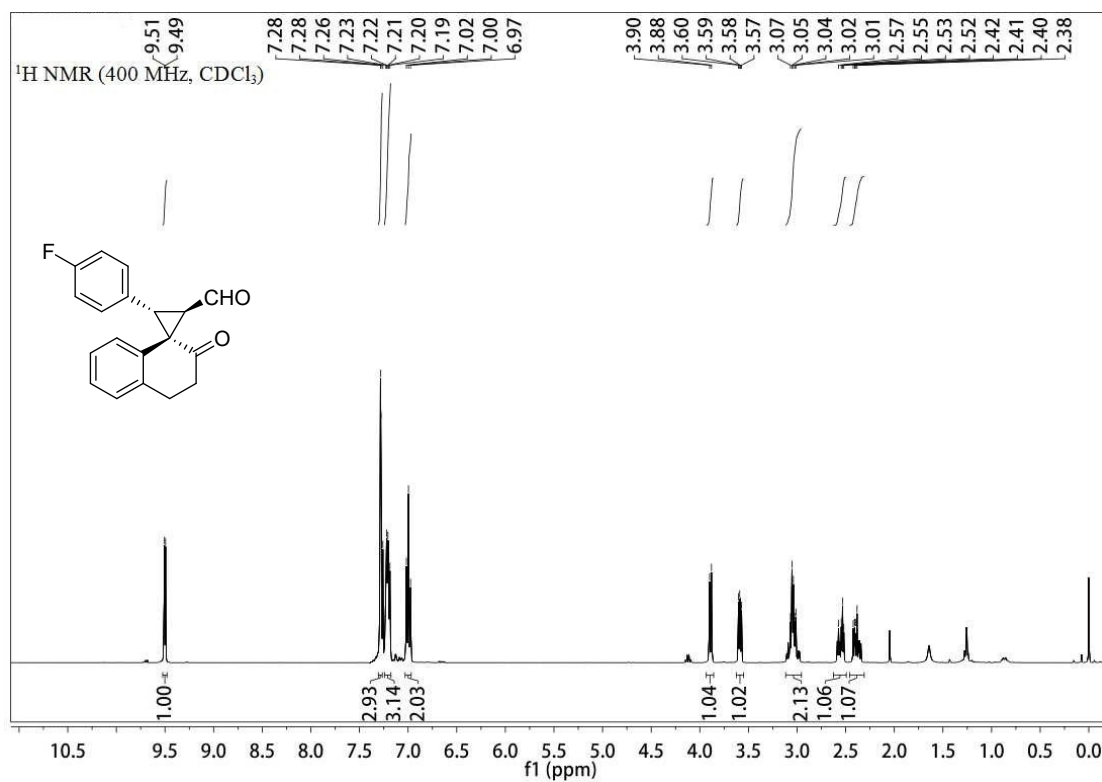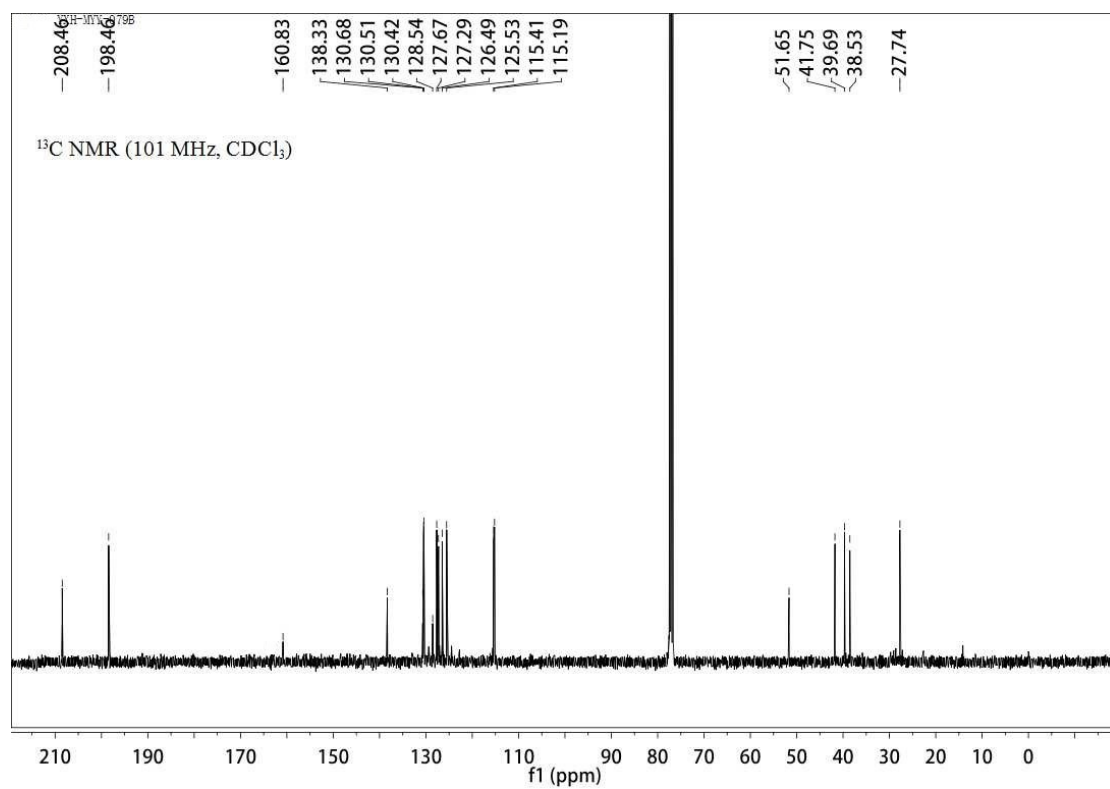

3h

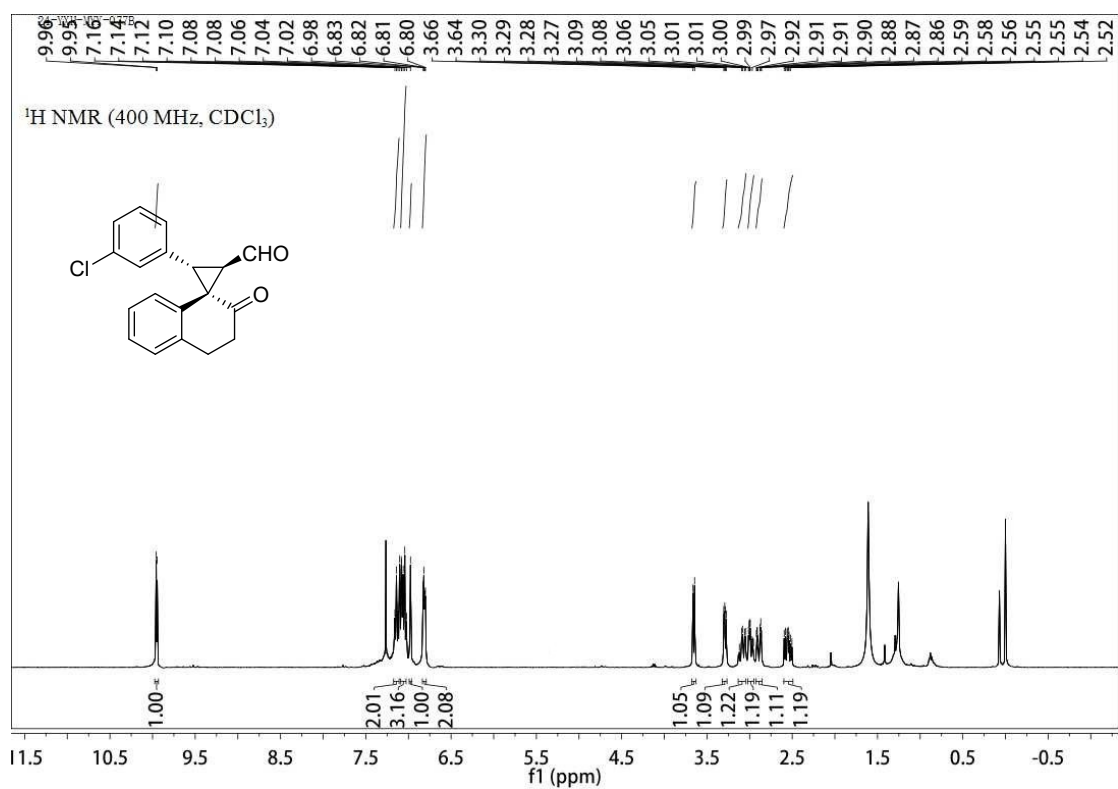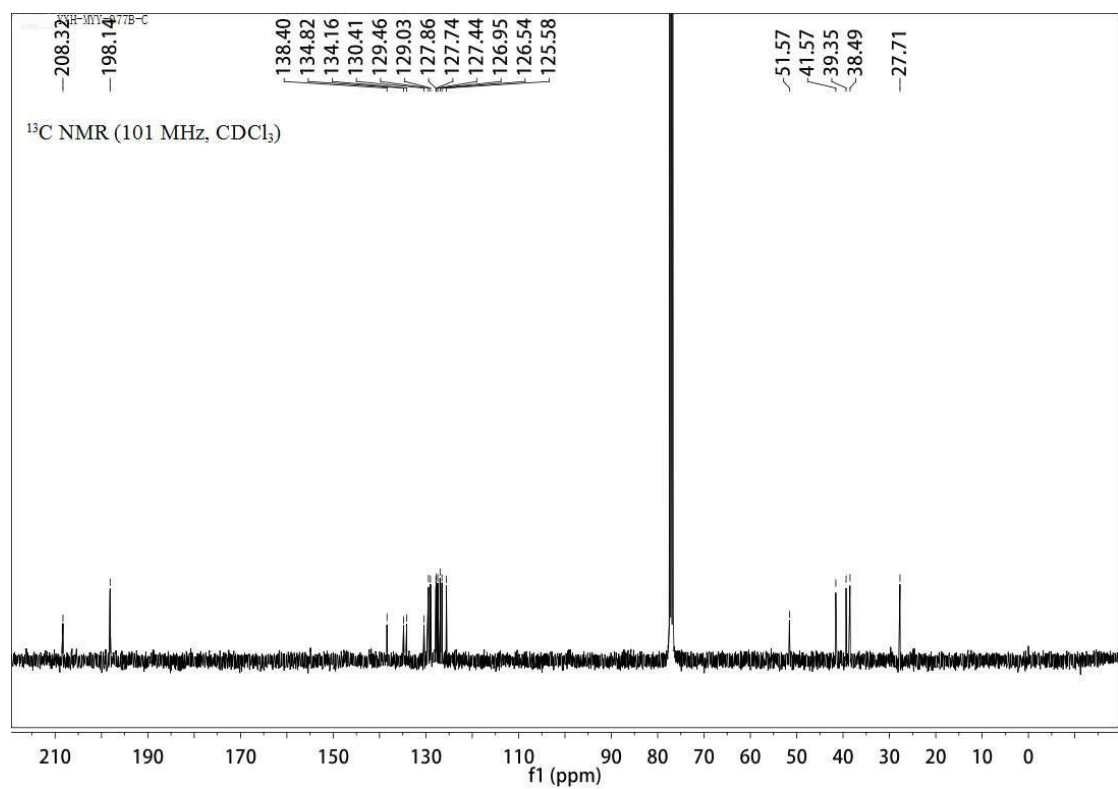



3i

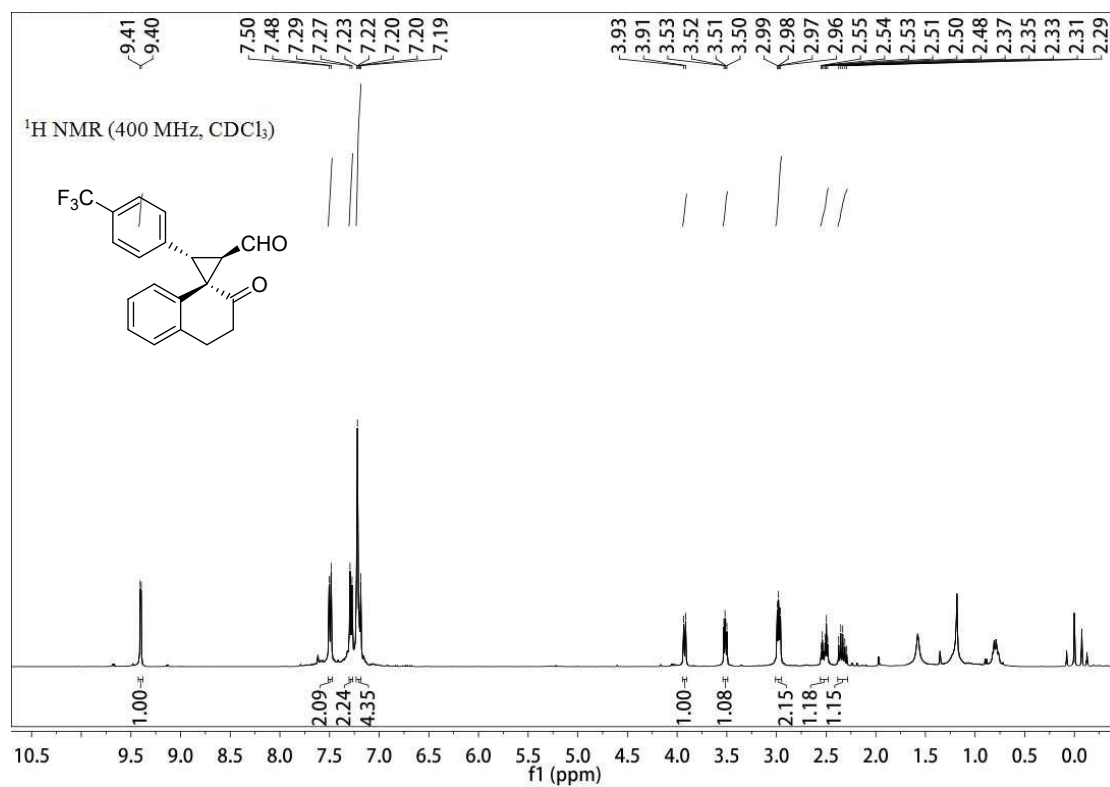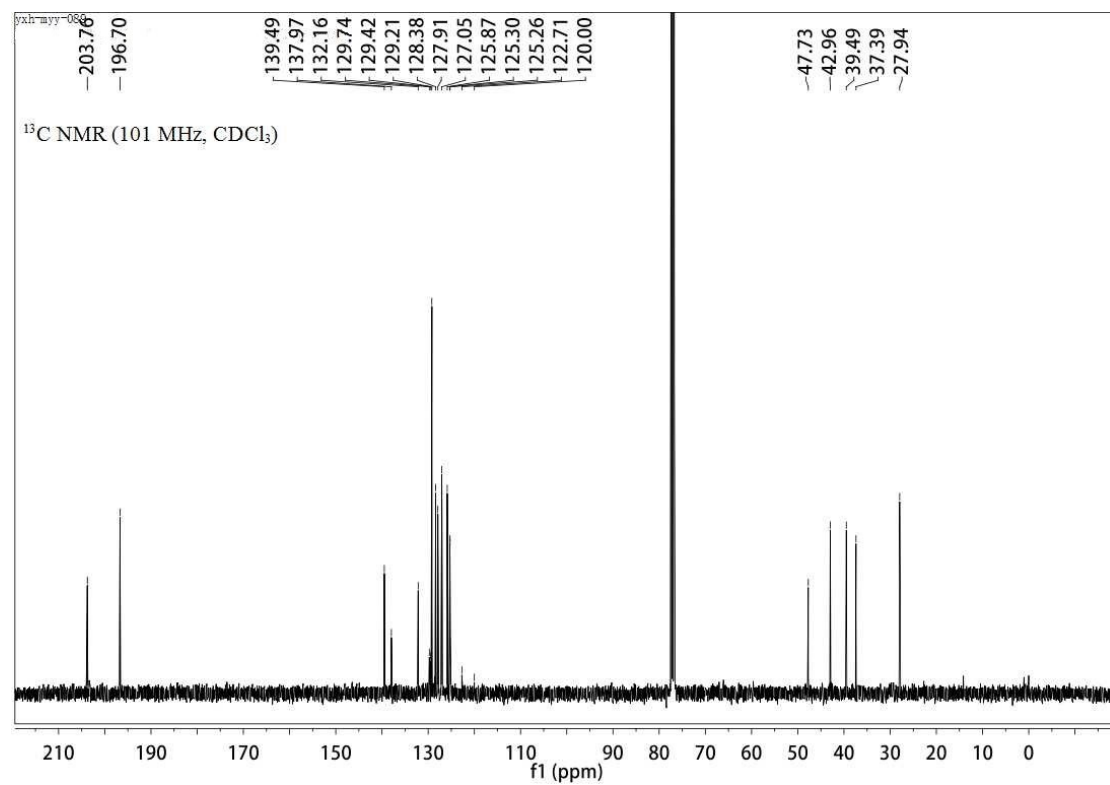

3j

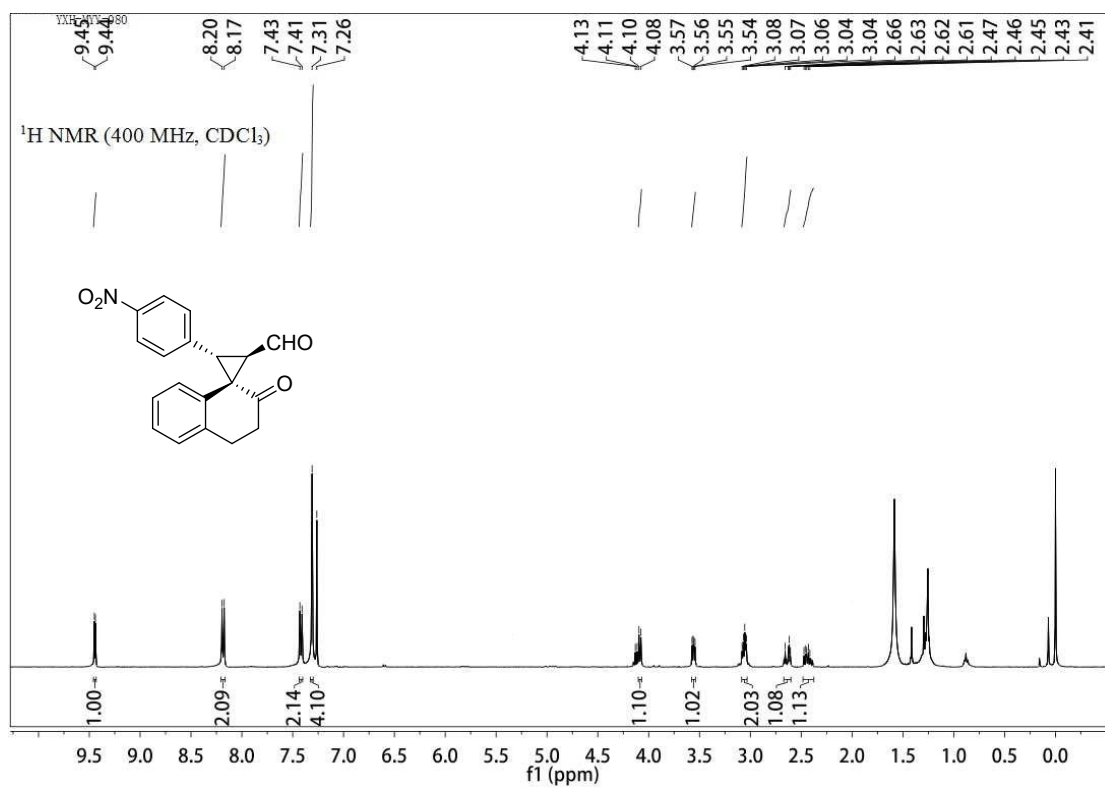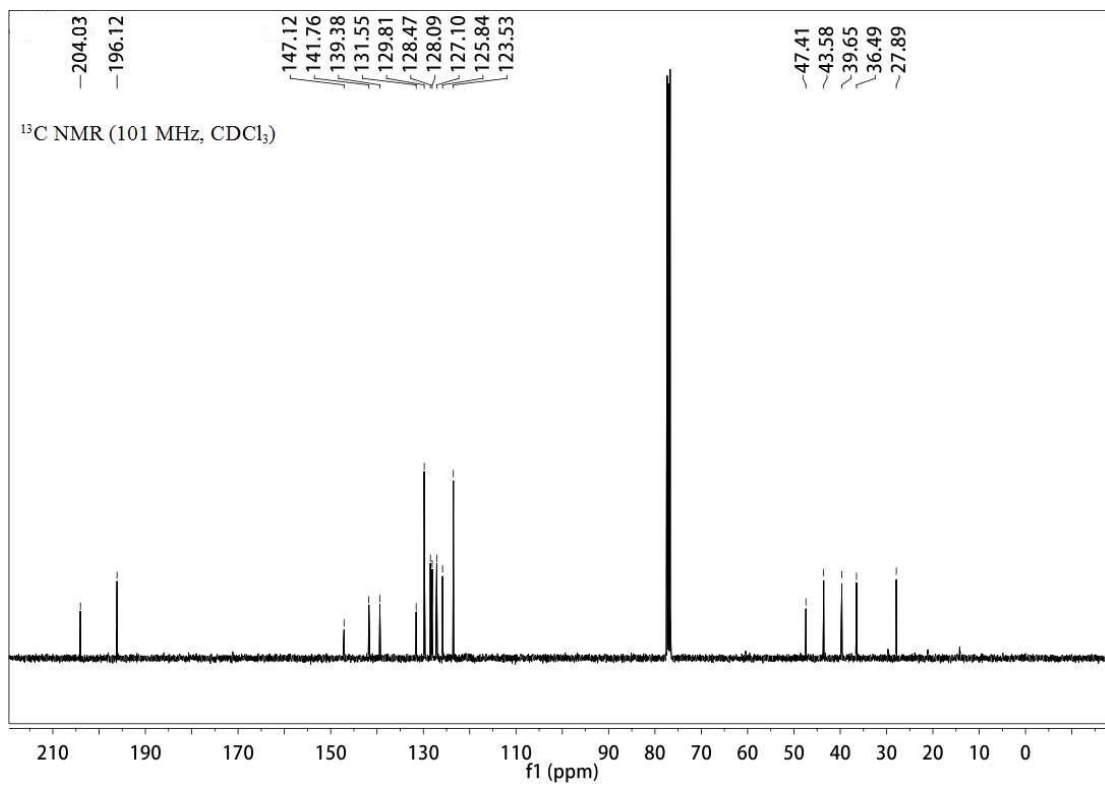

3k

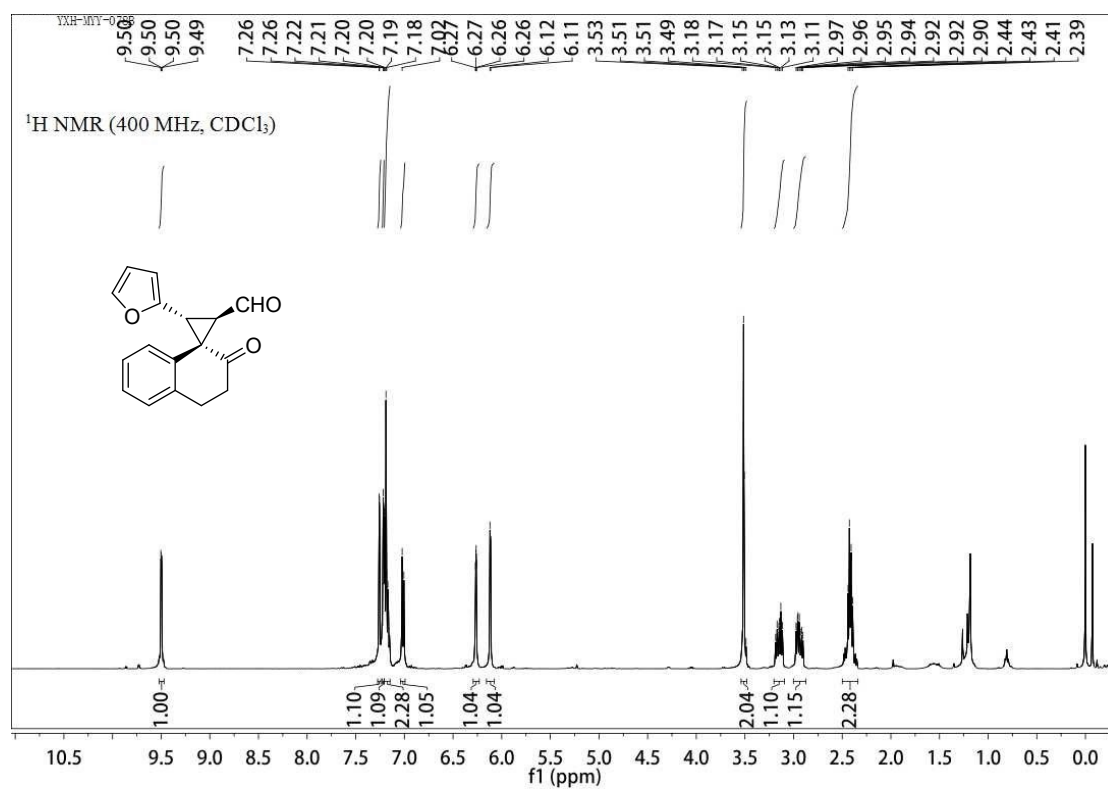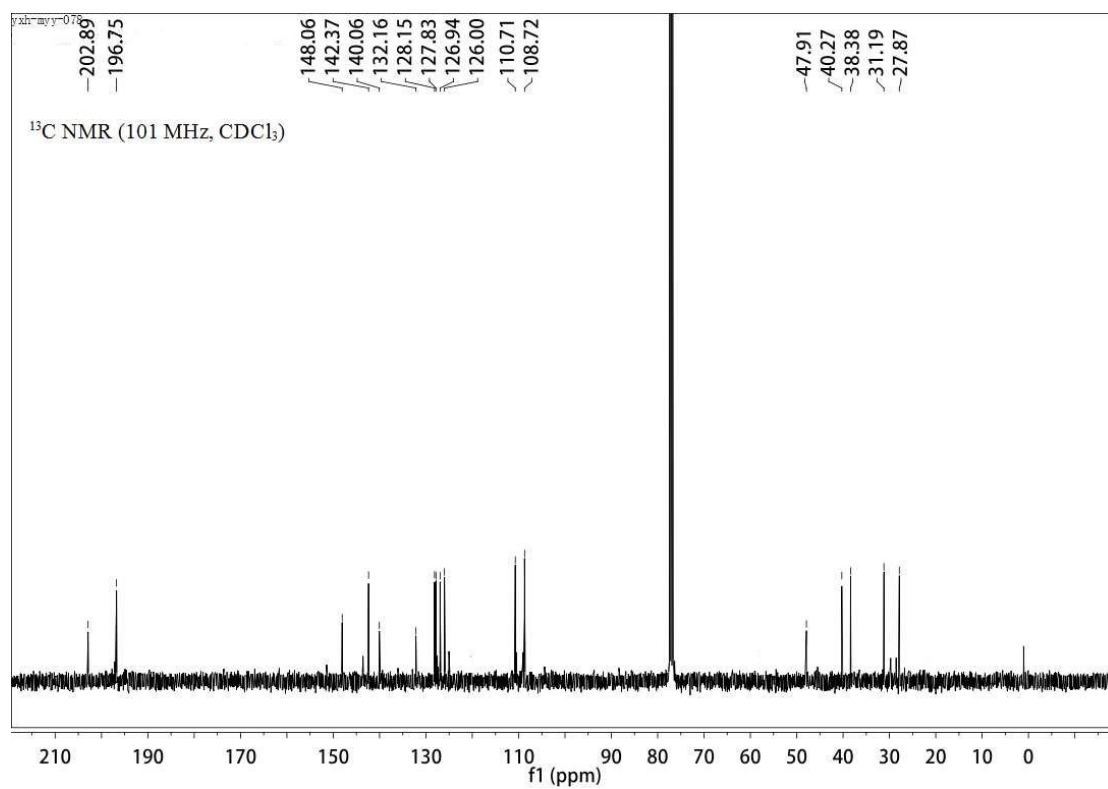

31

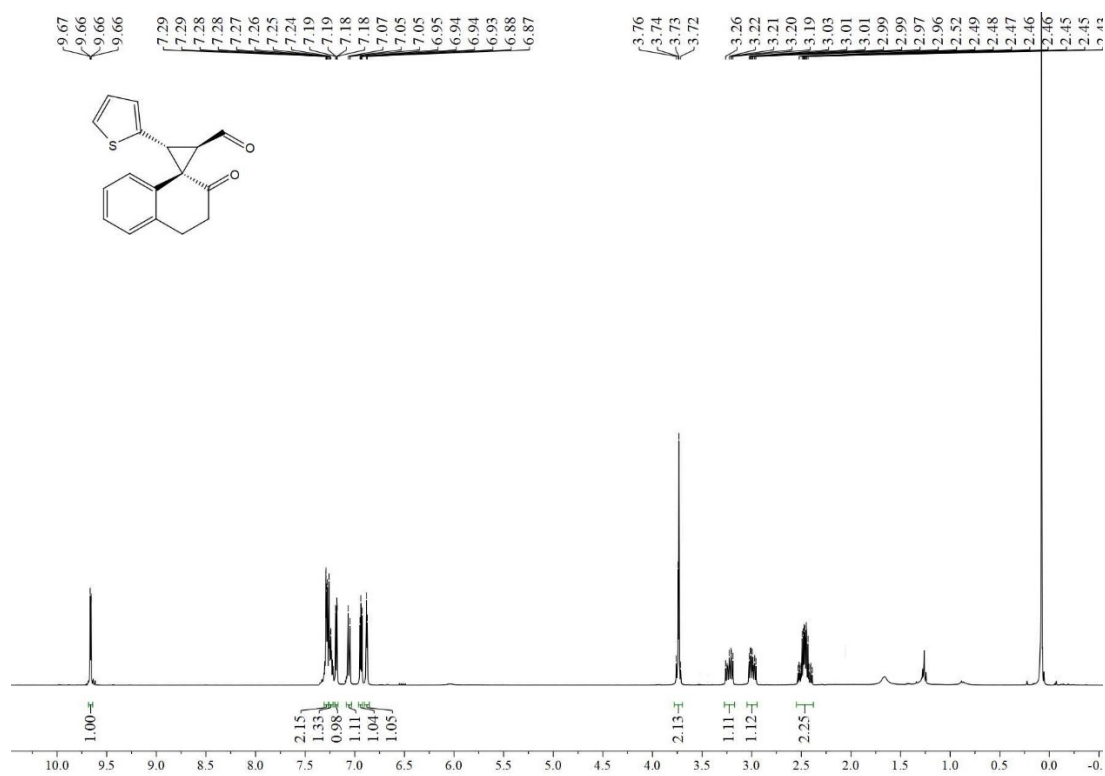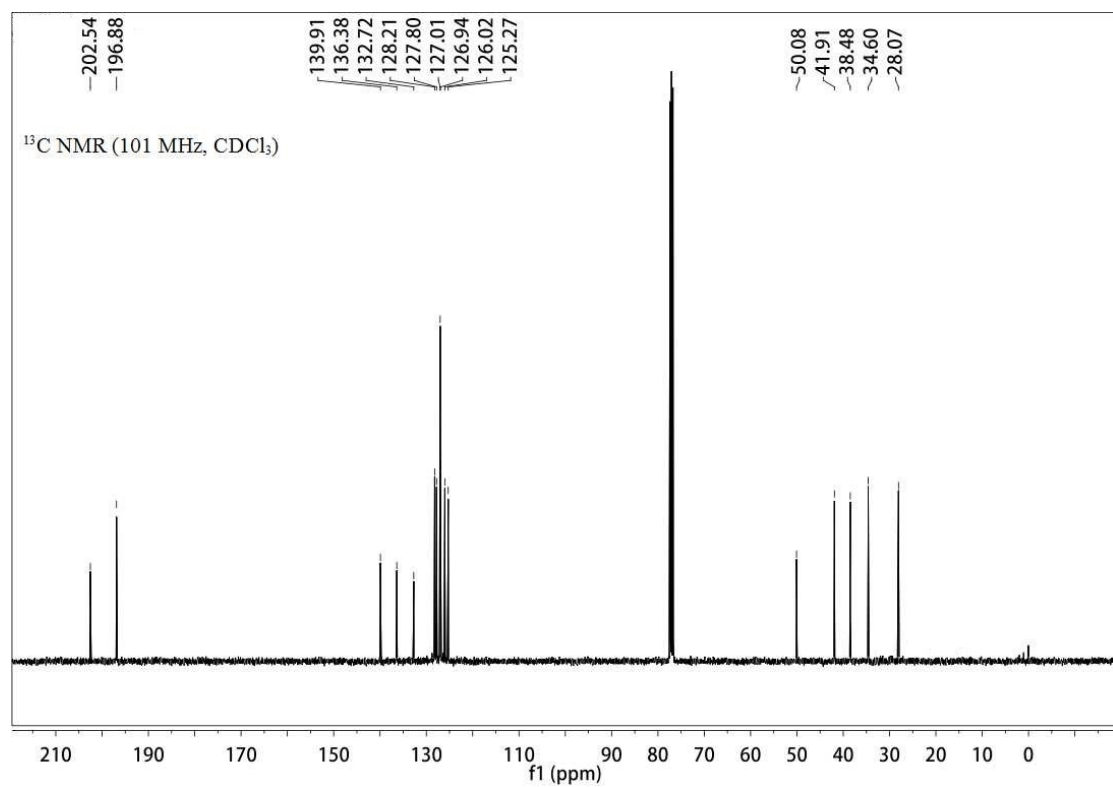

3m

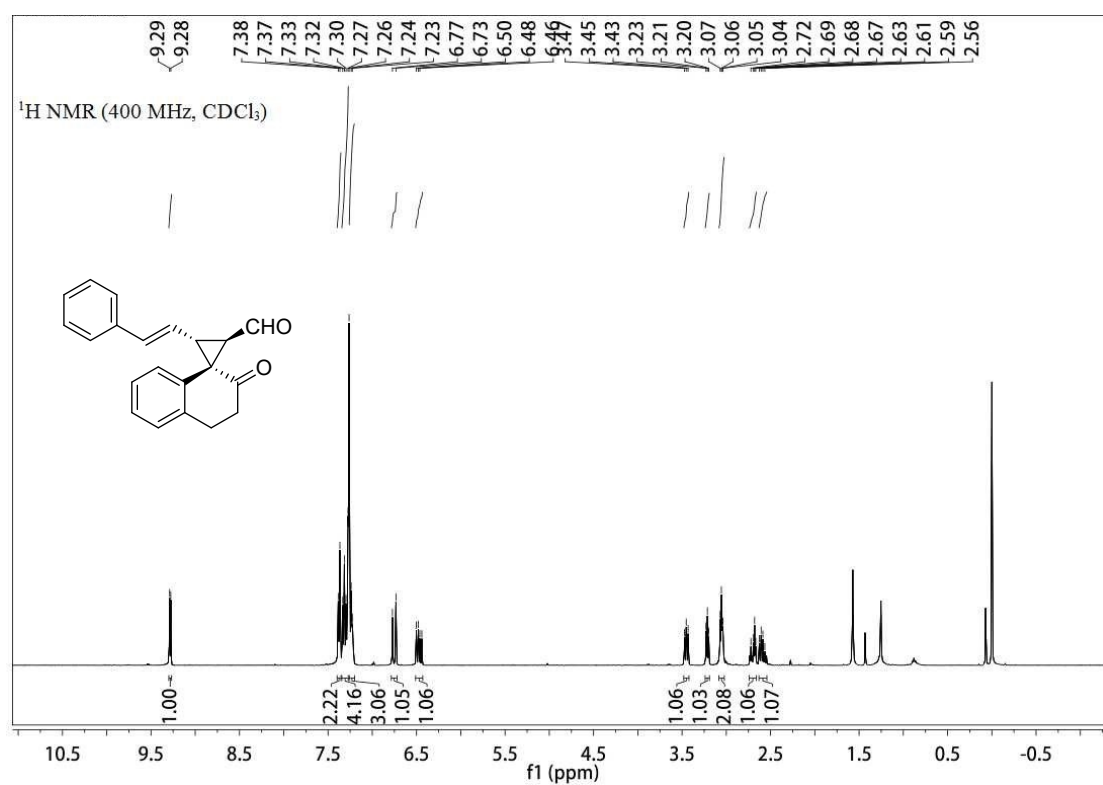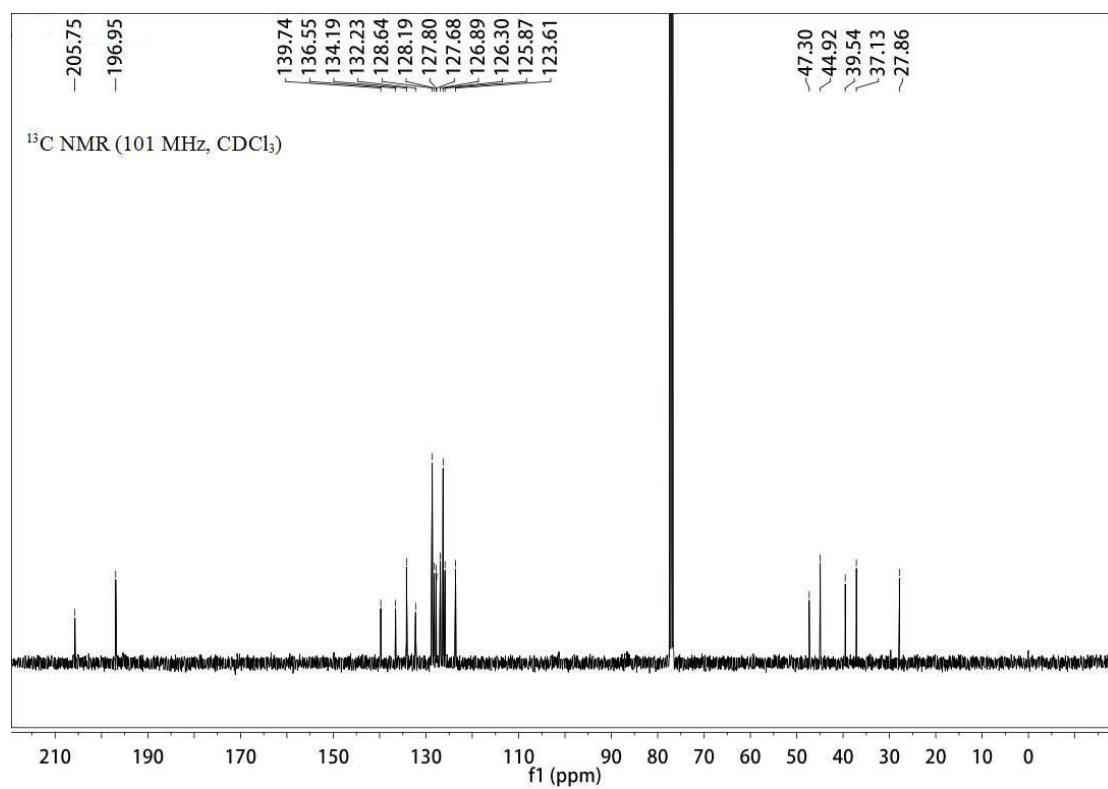

3n

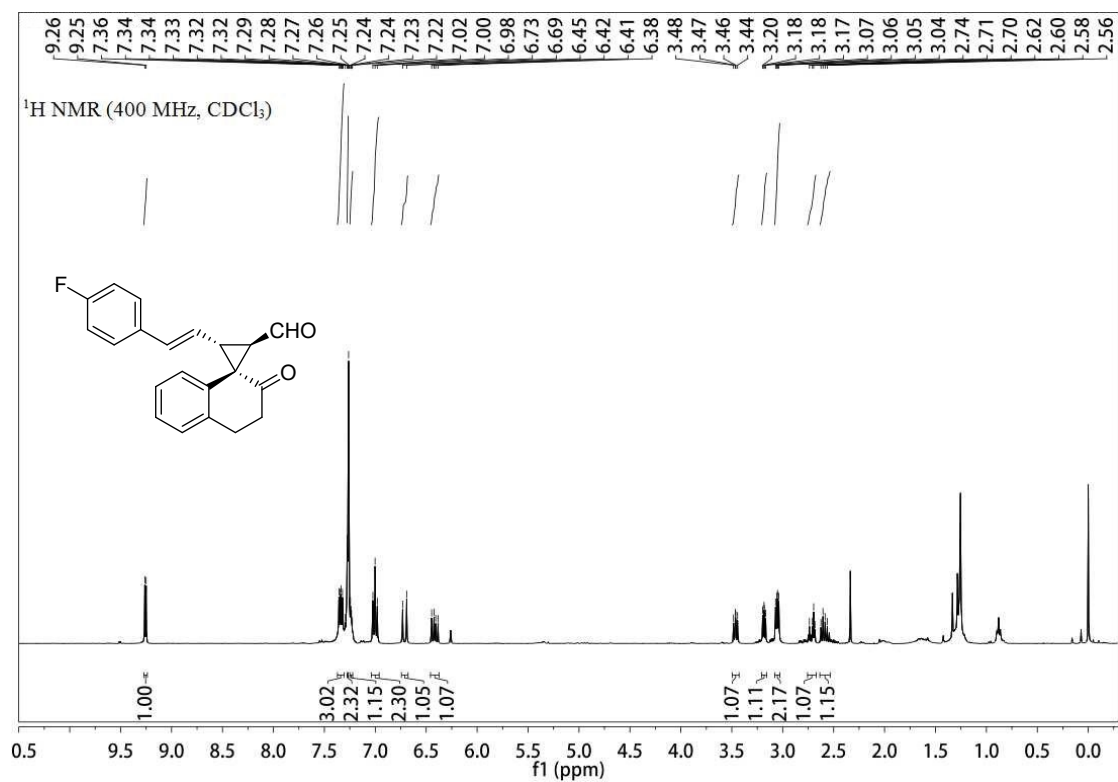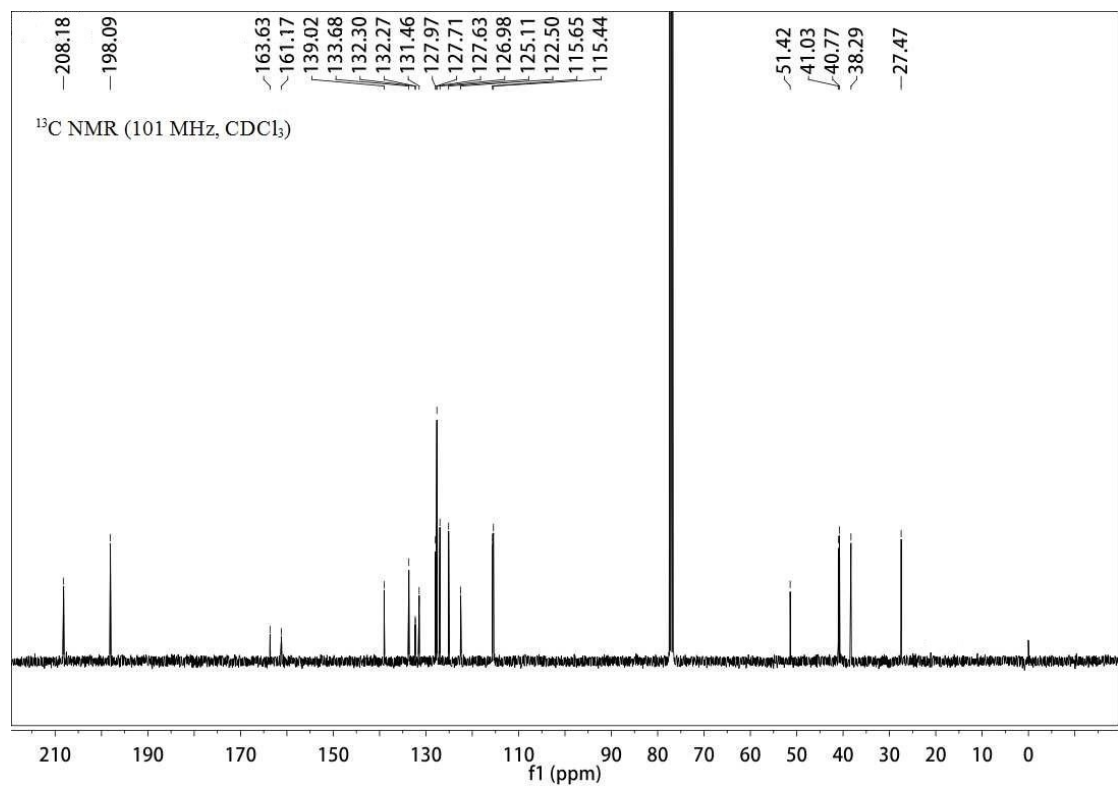

30

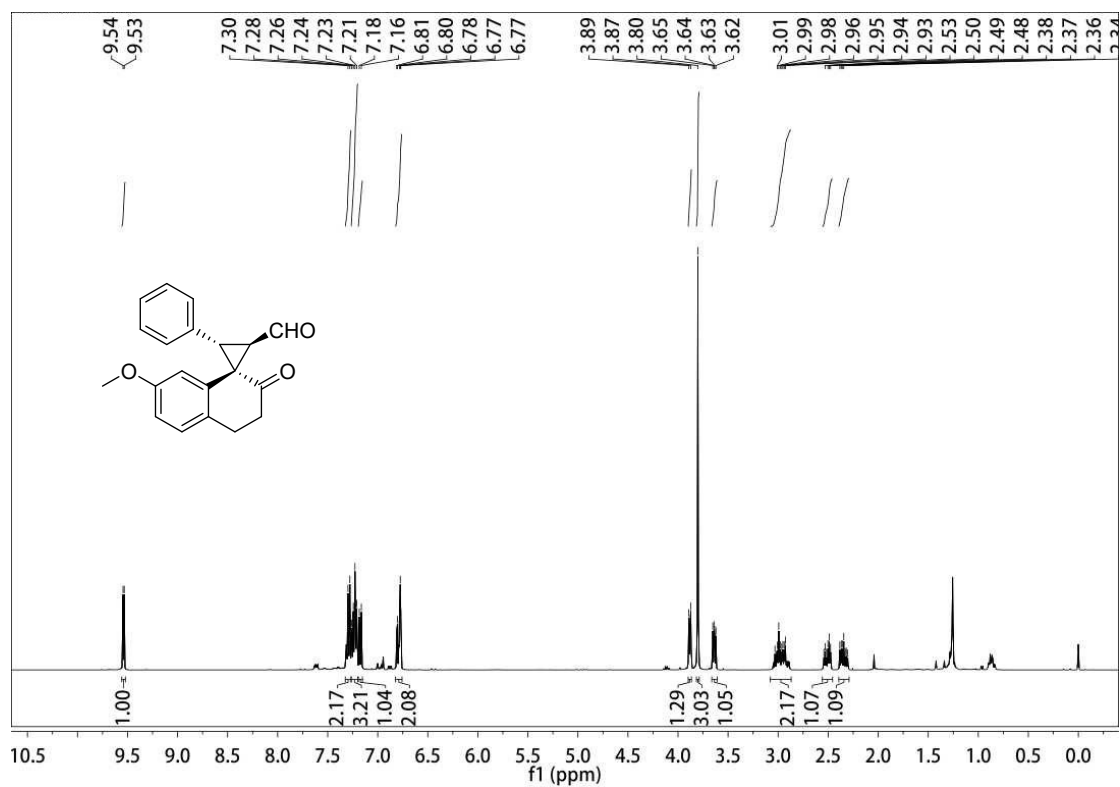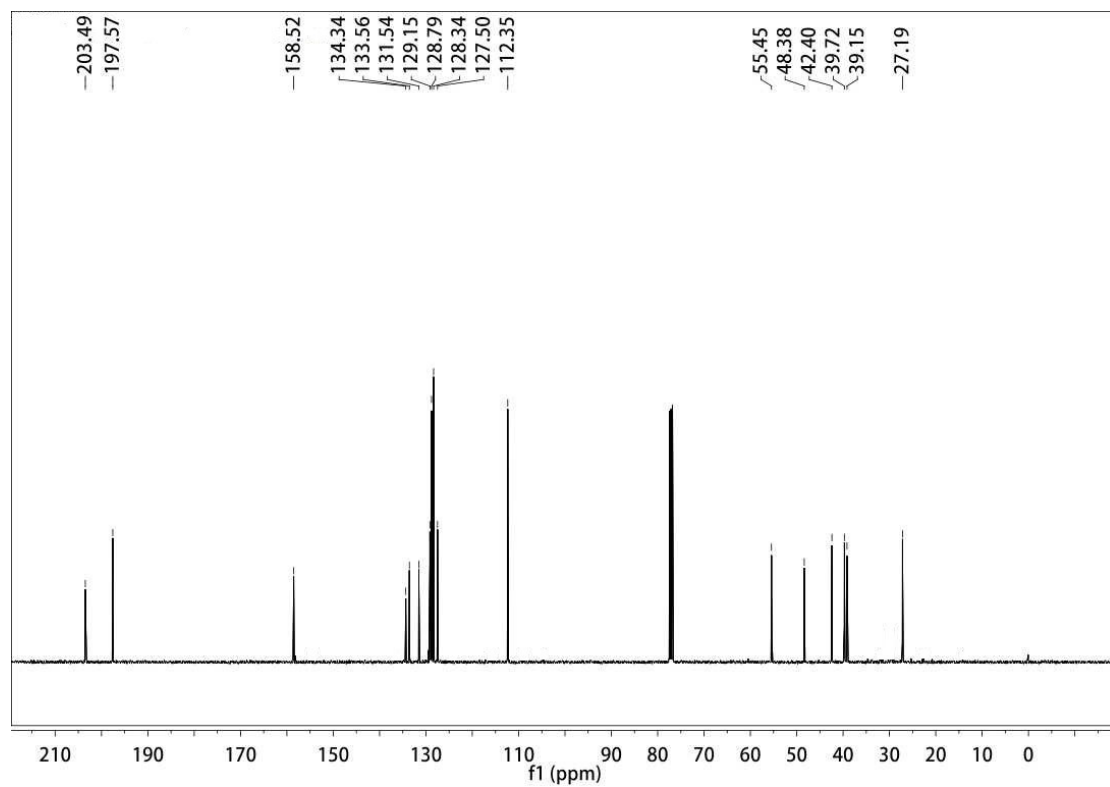

3p

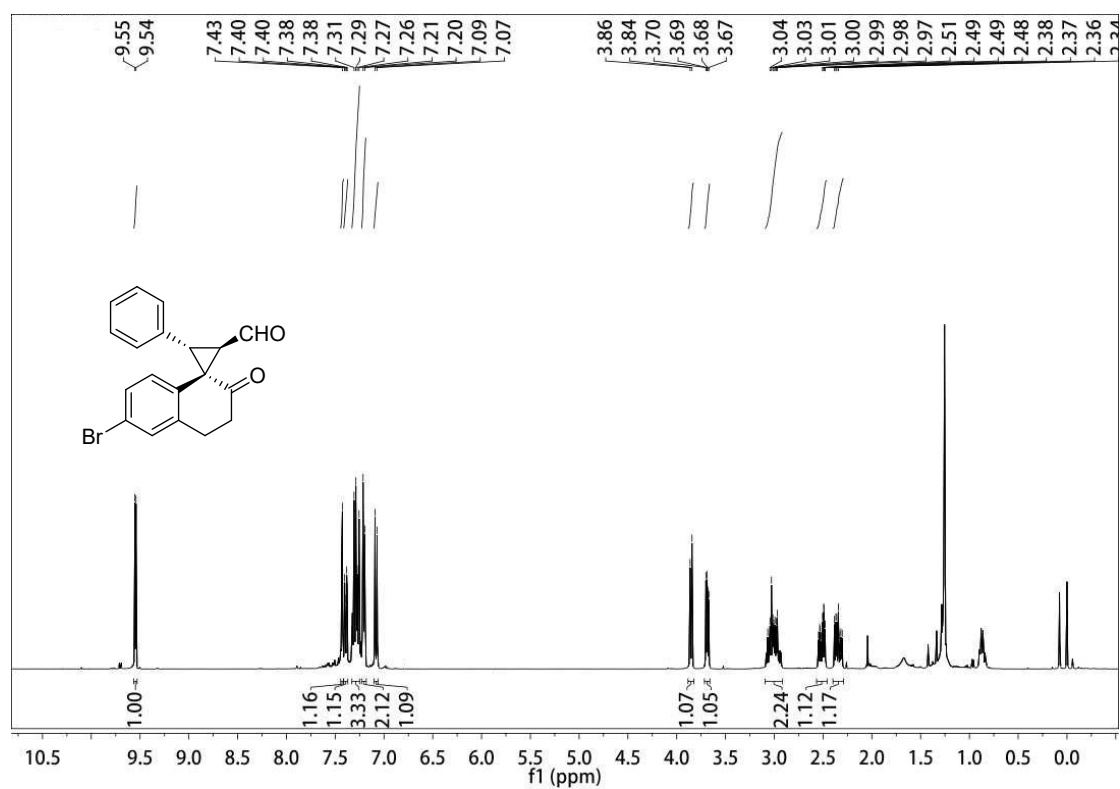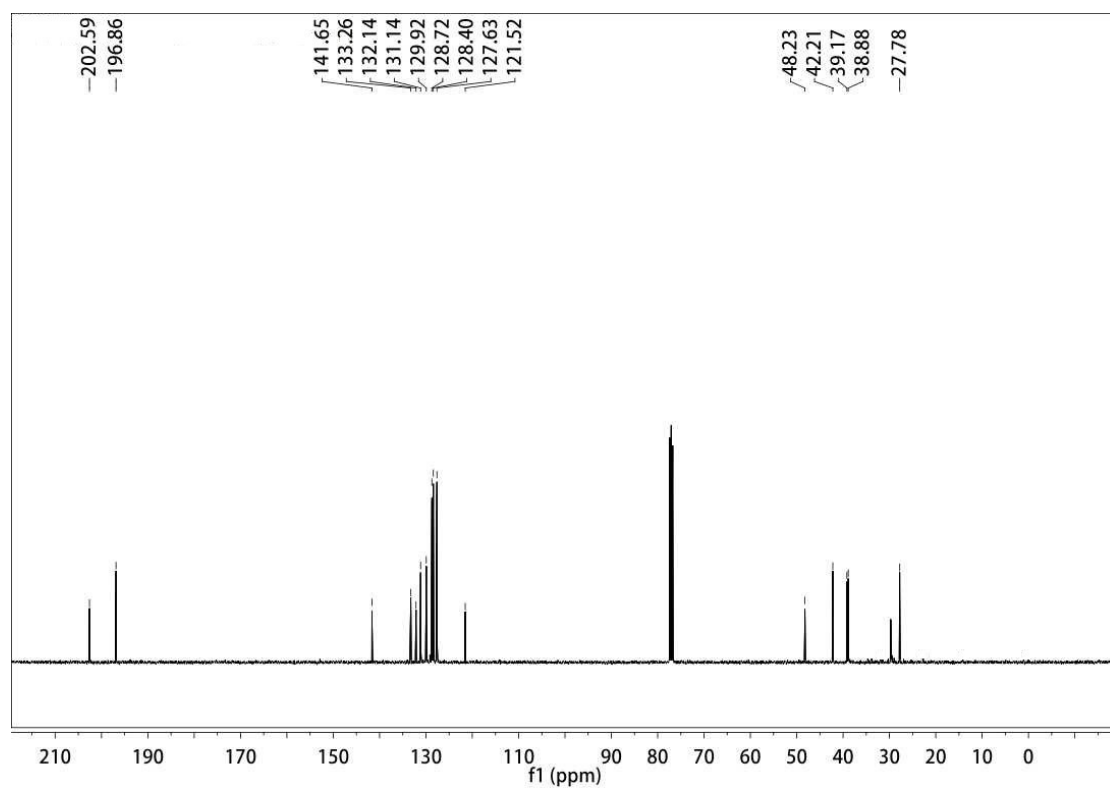



5a

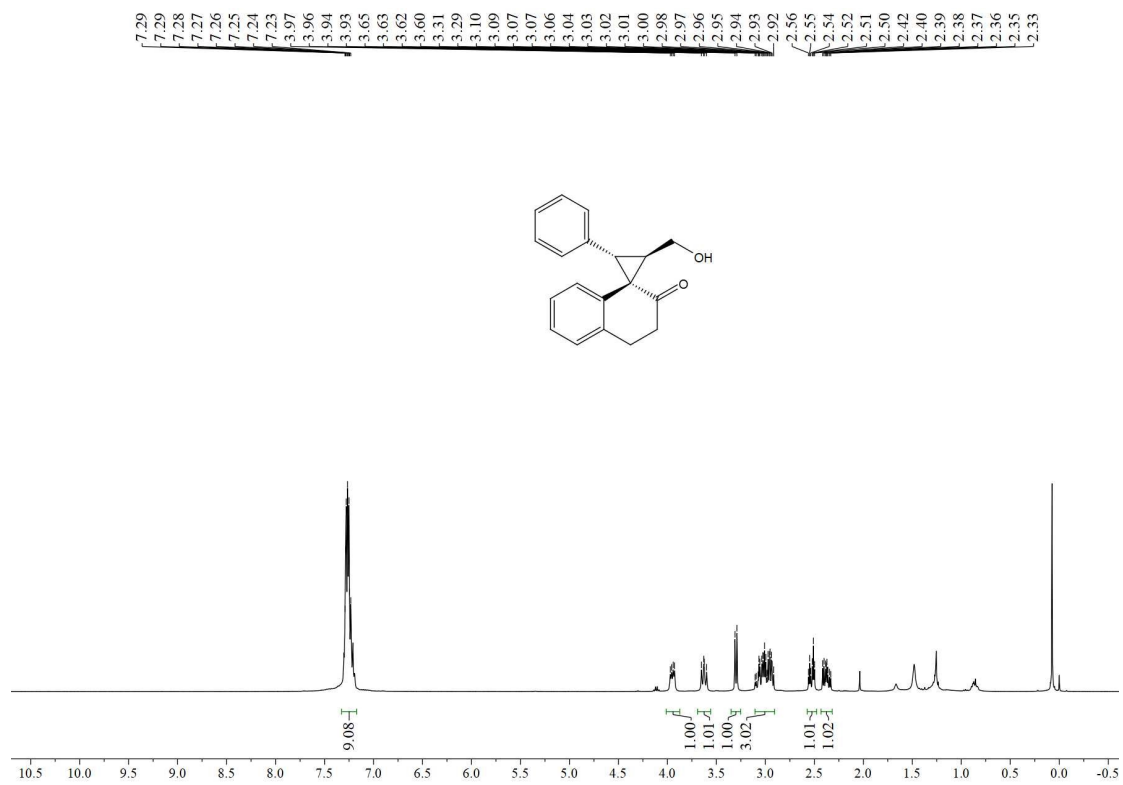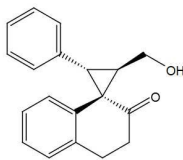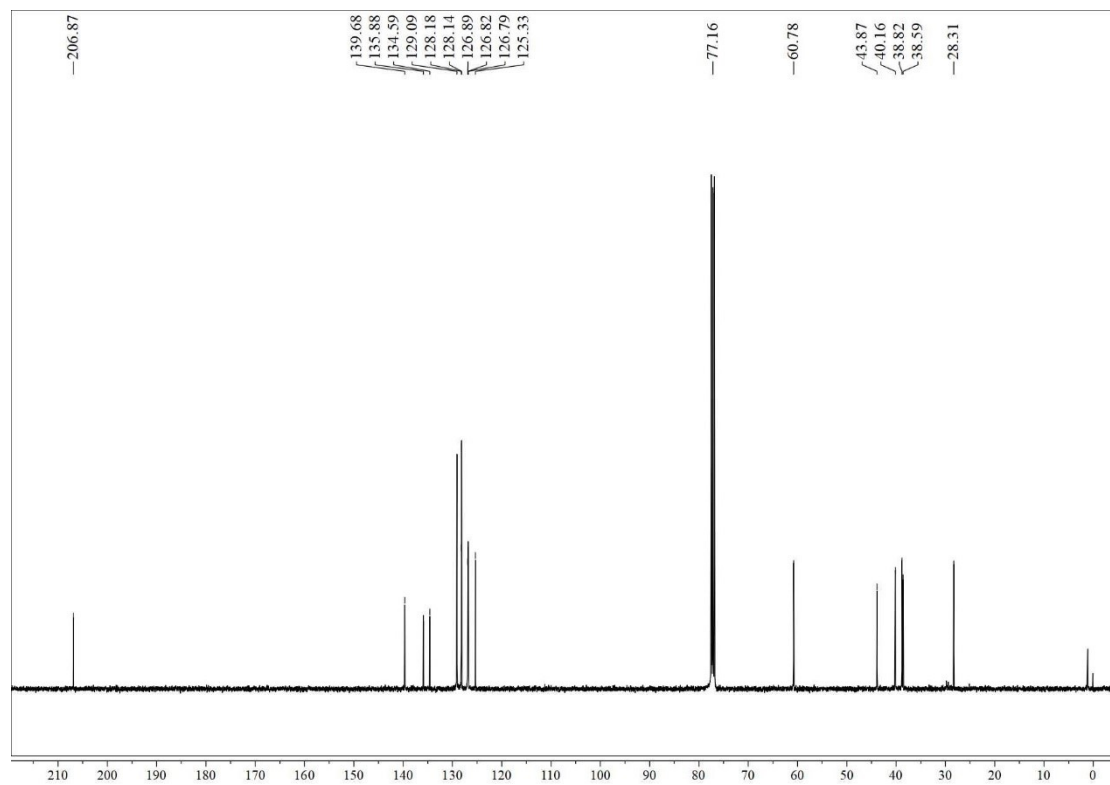

5b

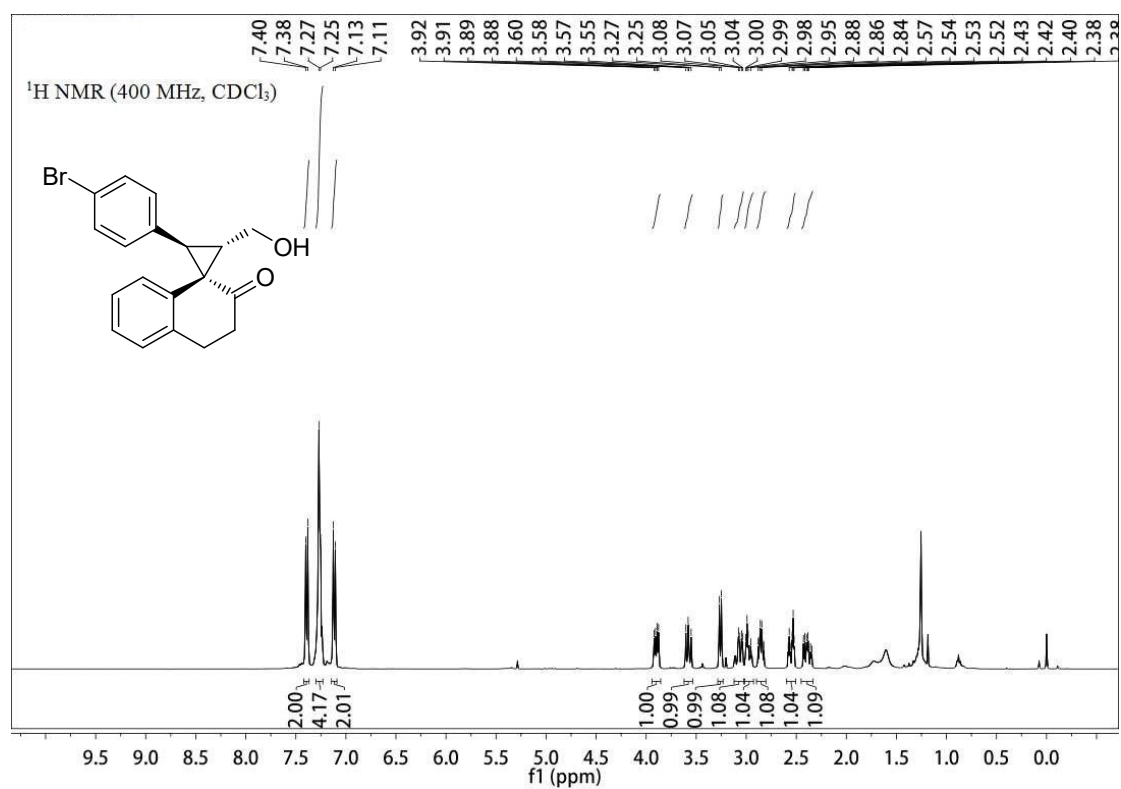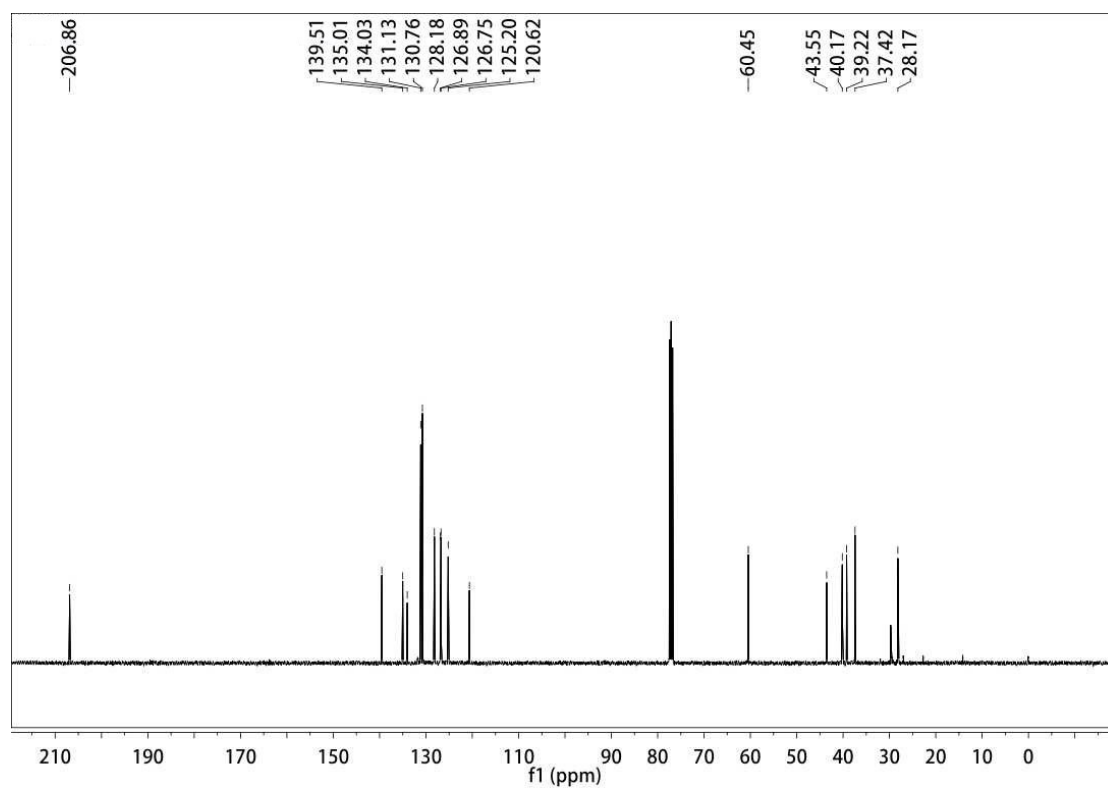

5c

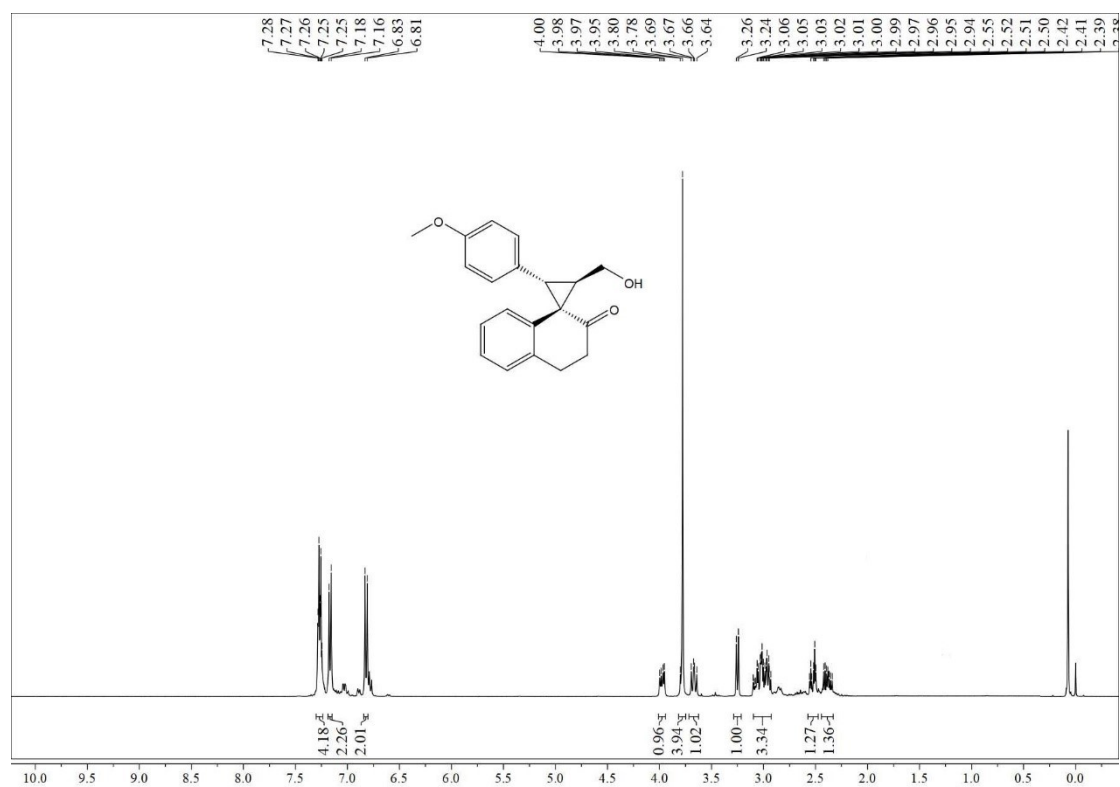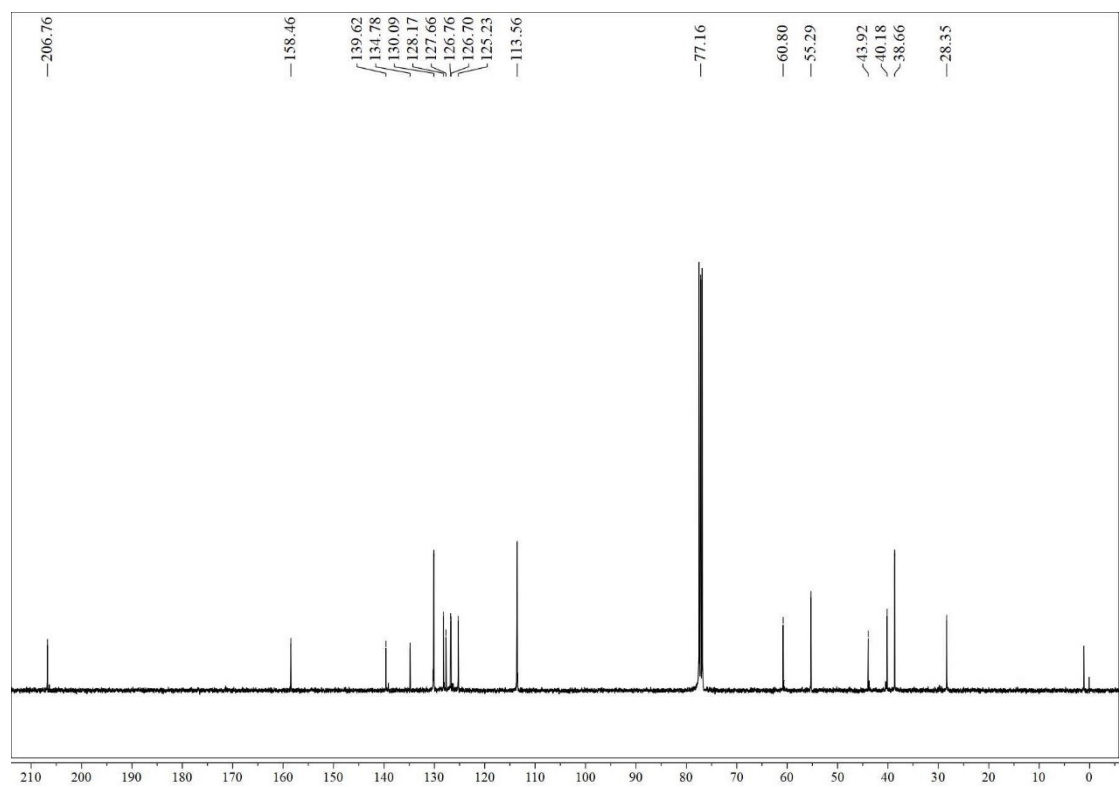

5d

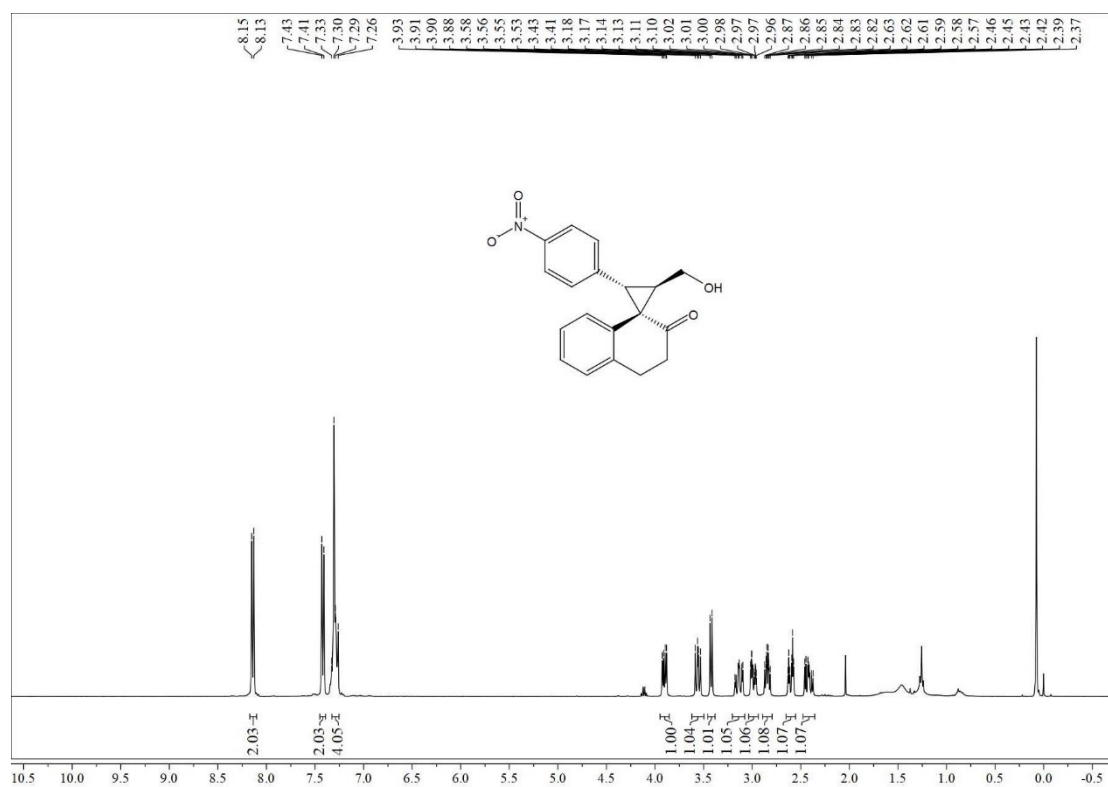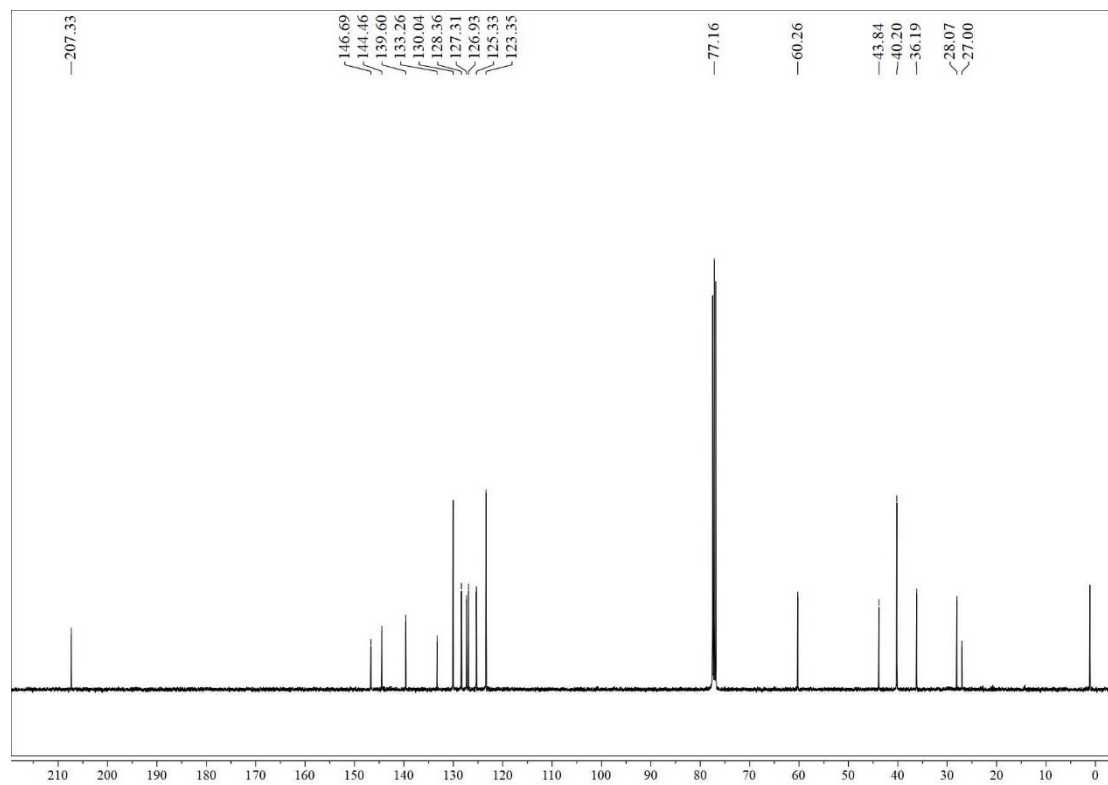

5e

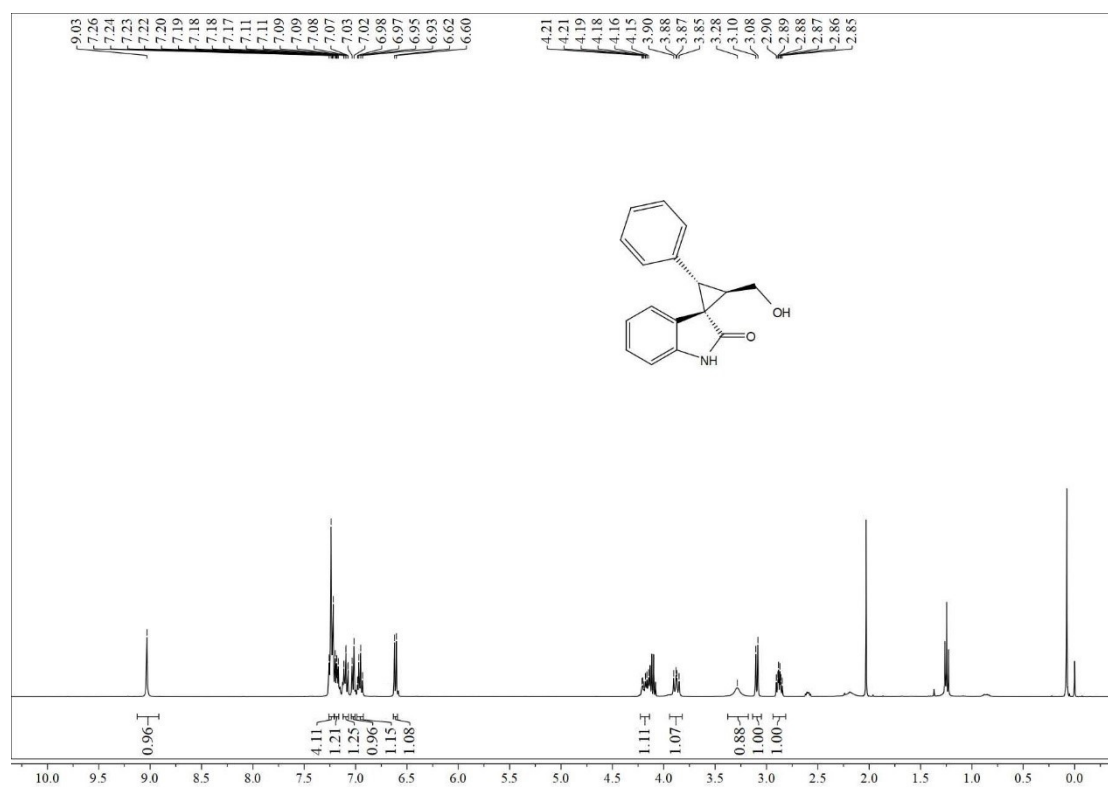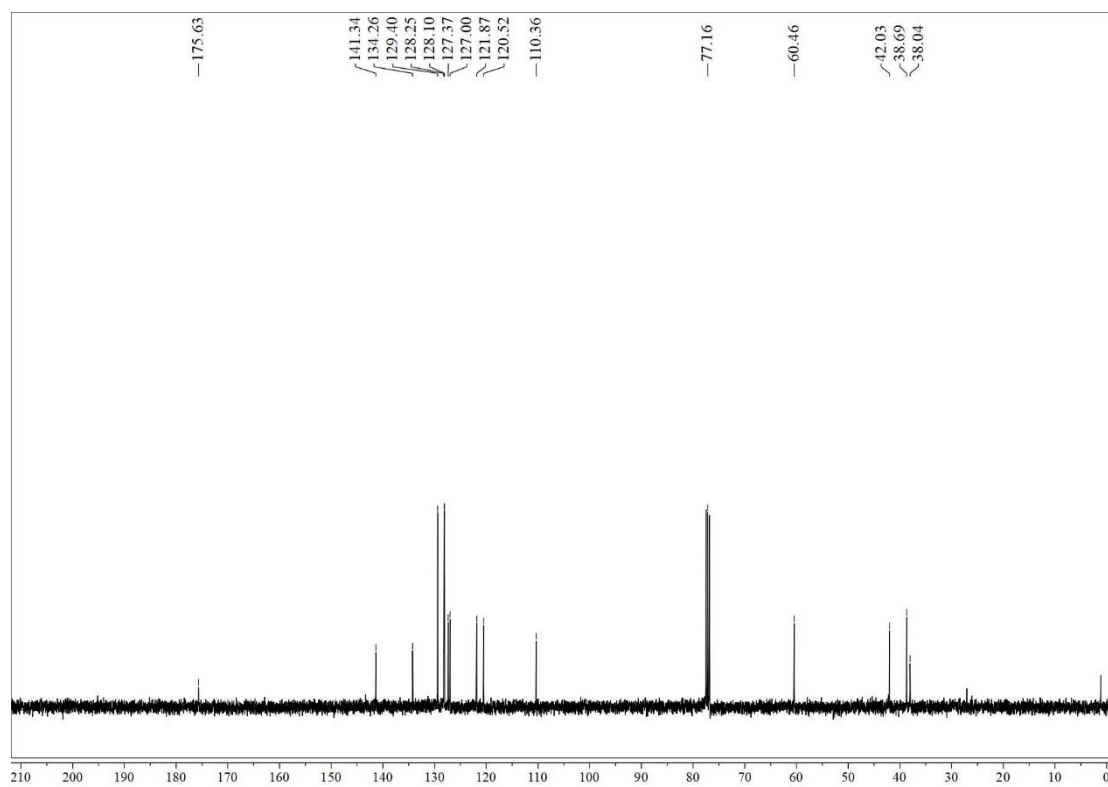

5f

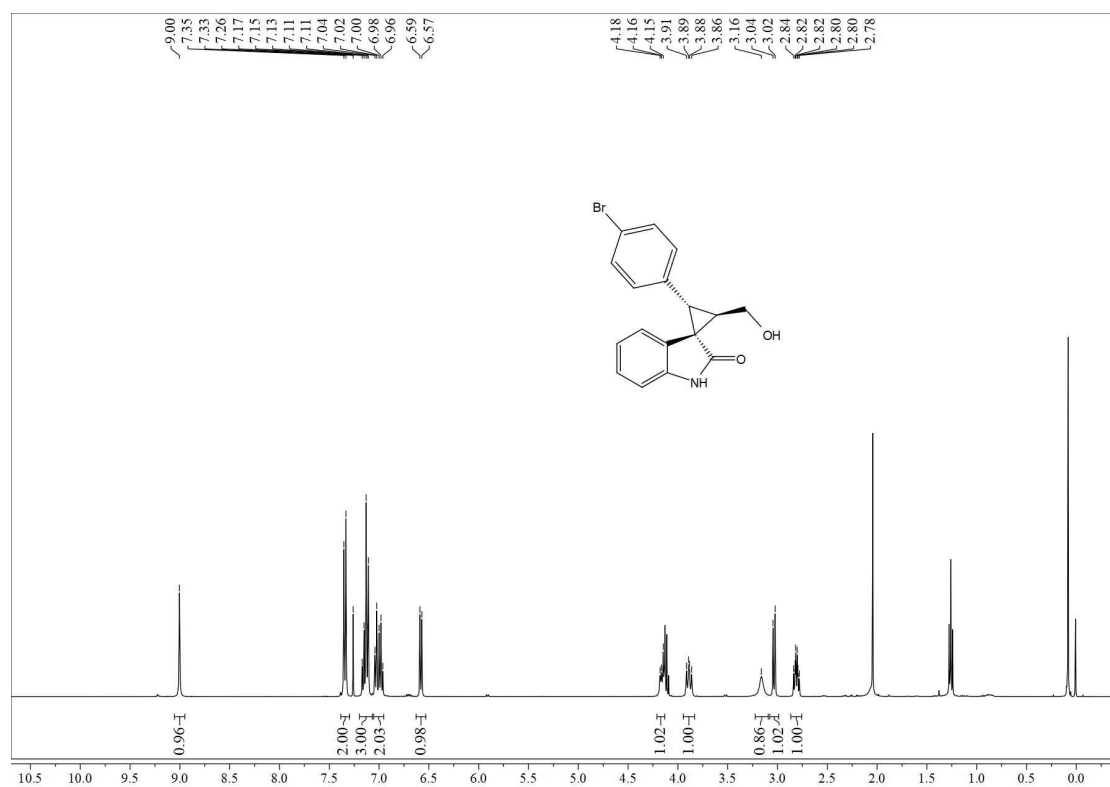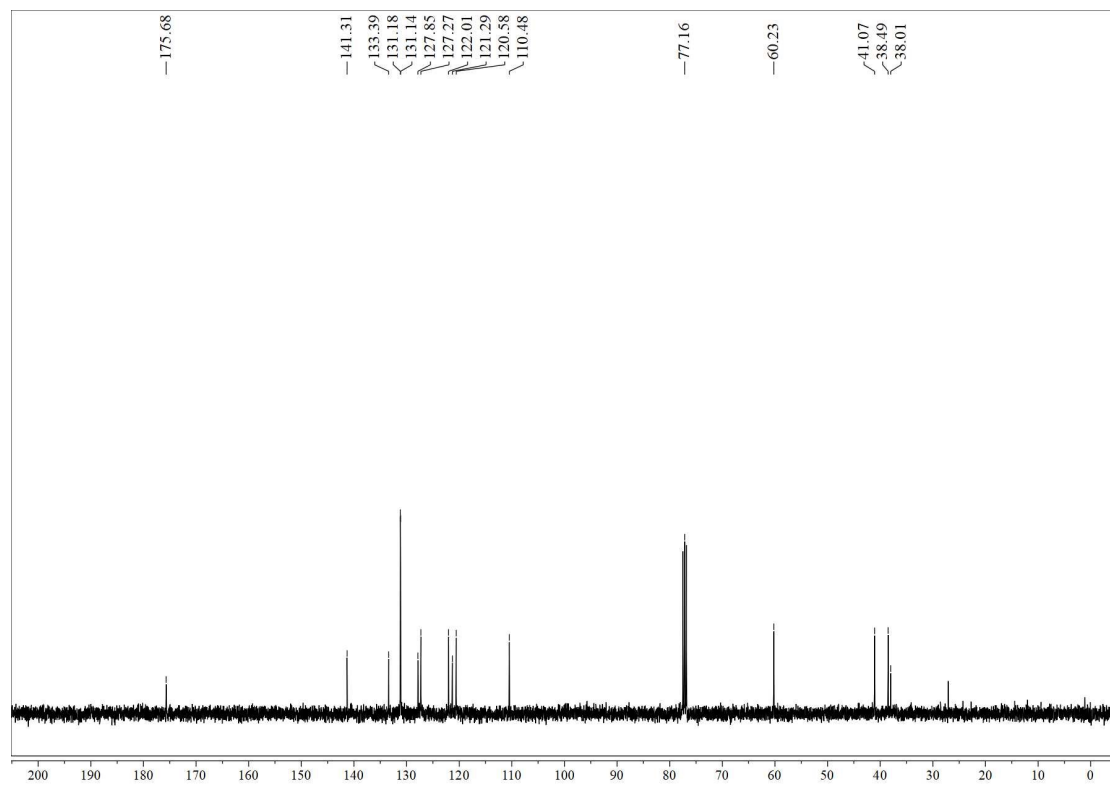

5g

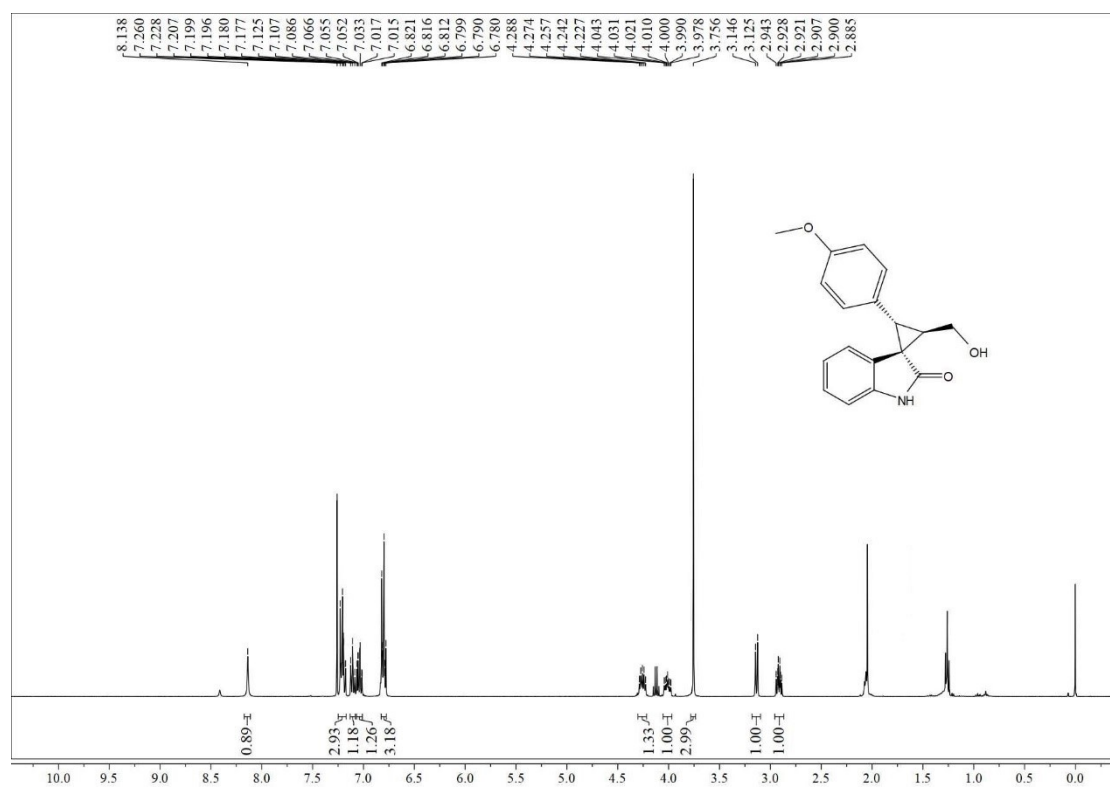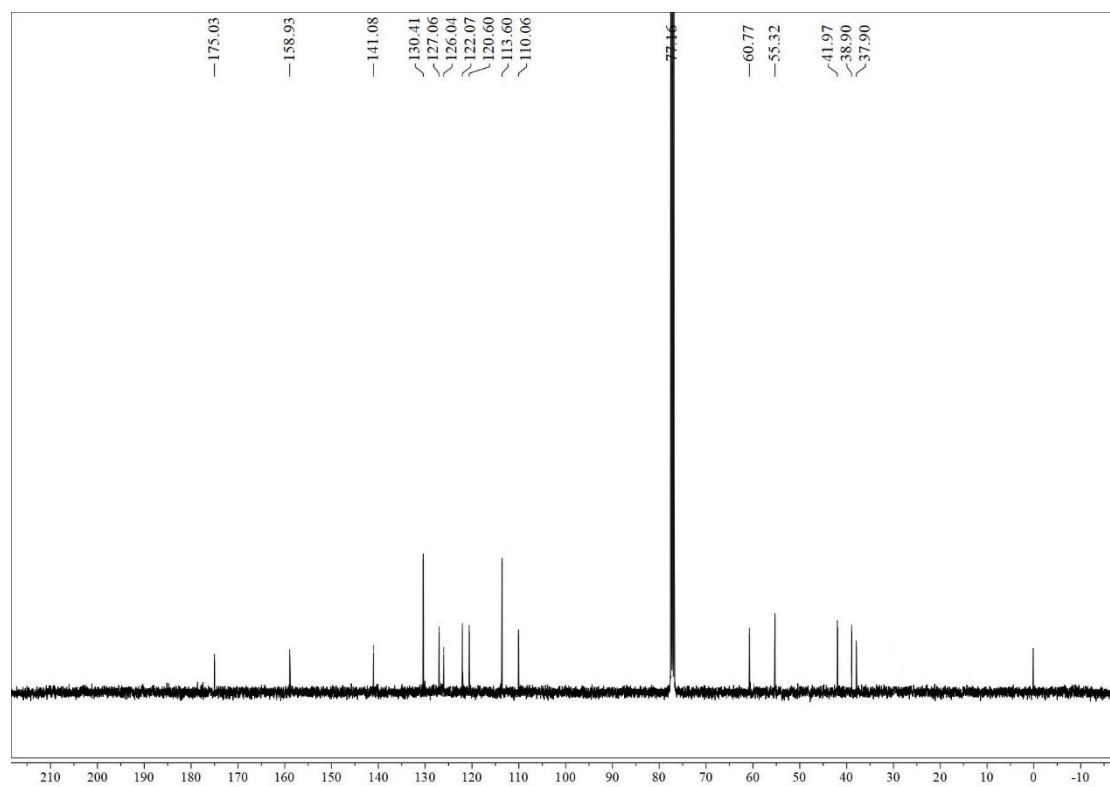

5h

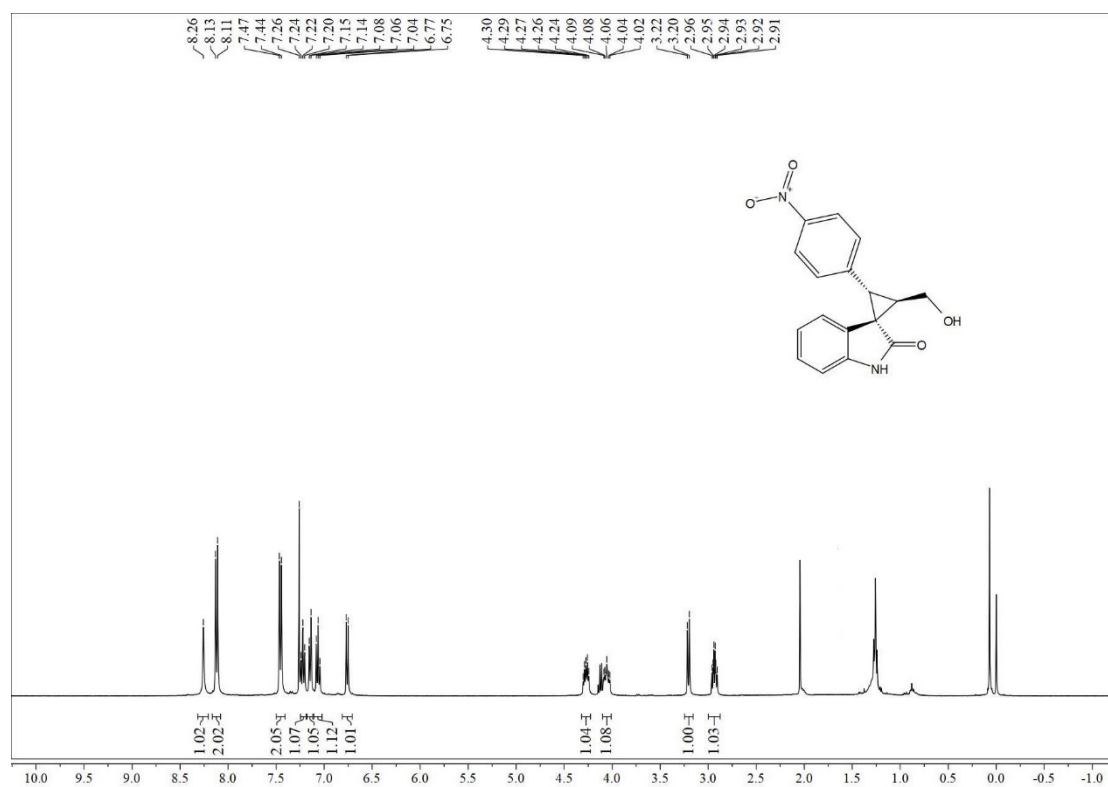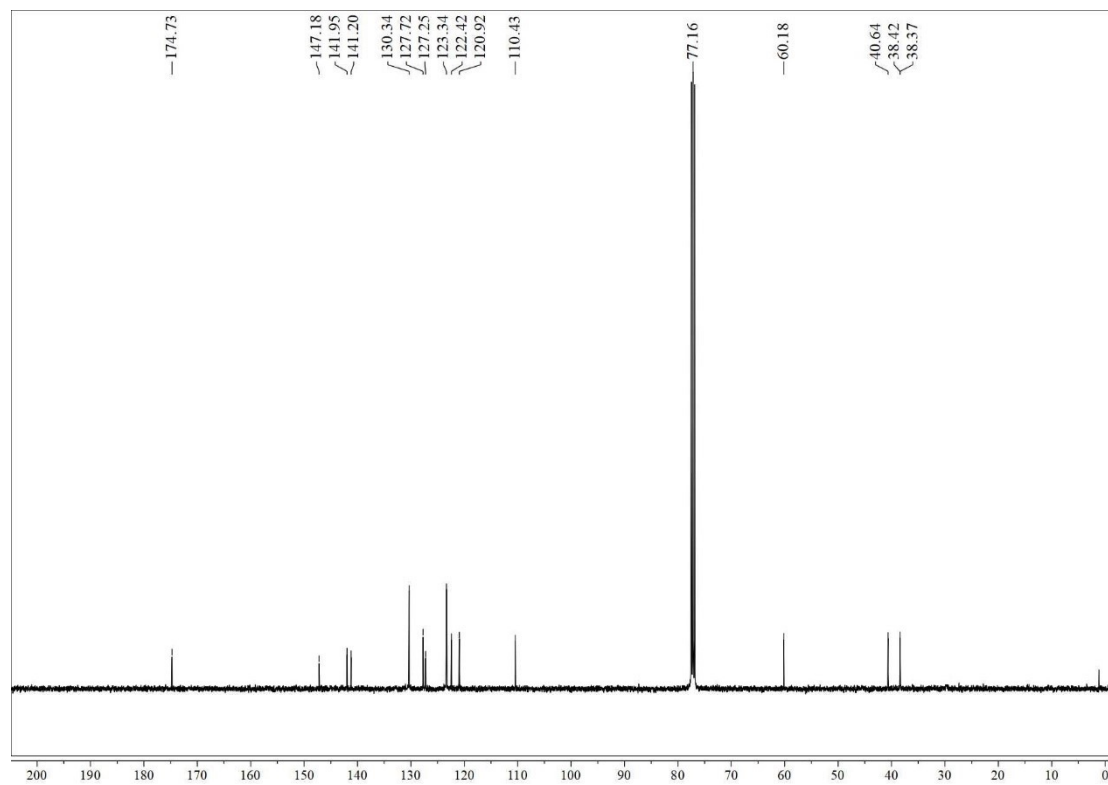



5i

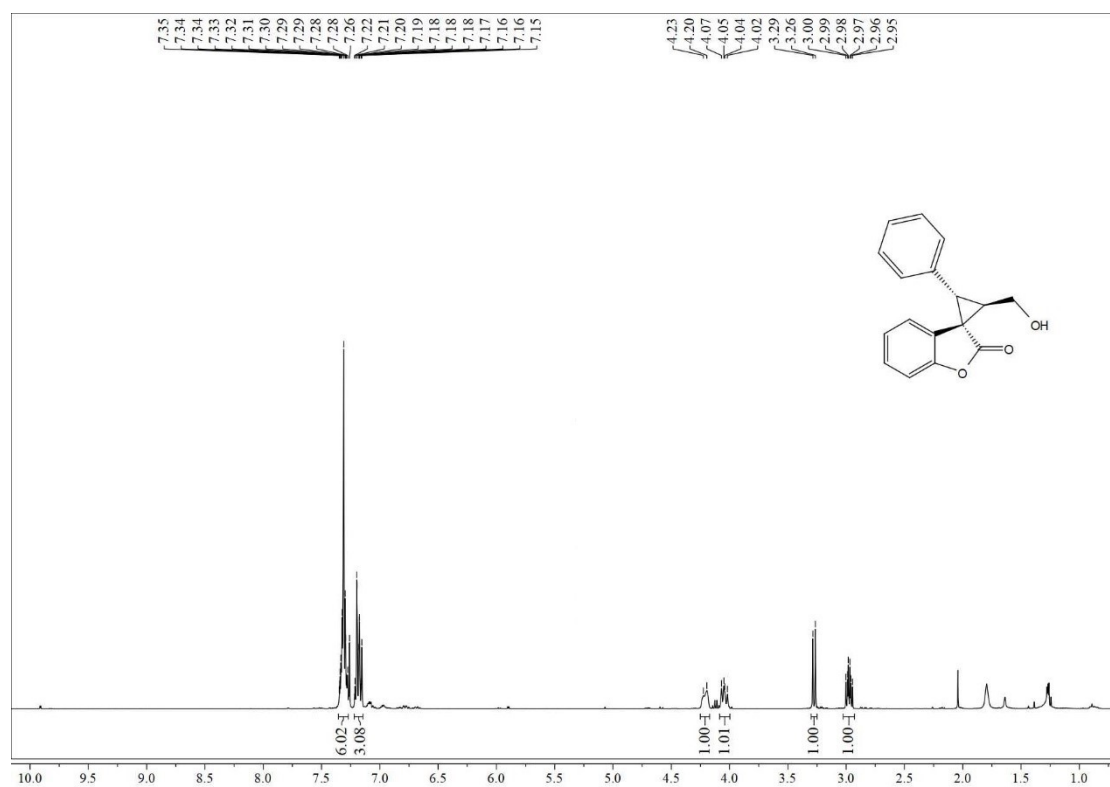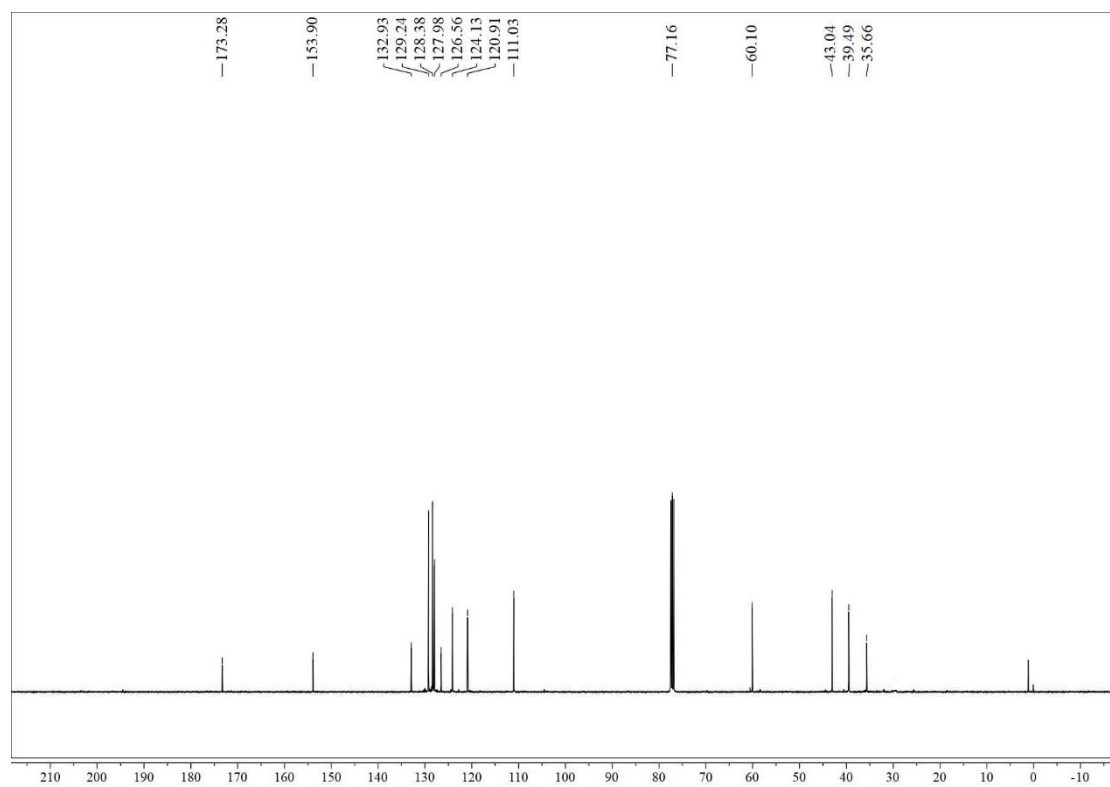

5j

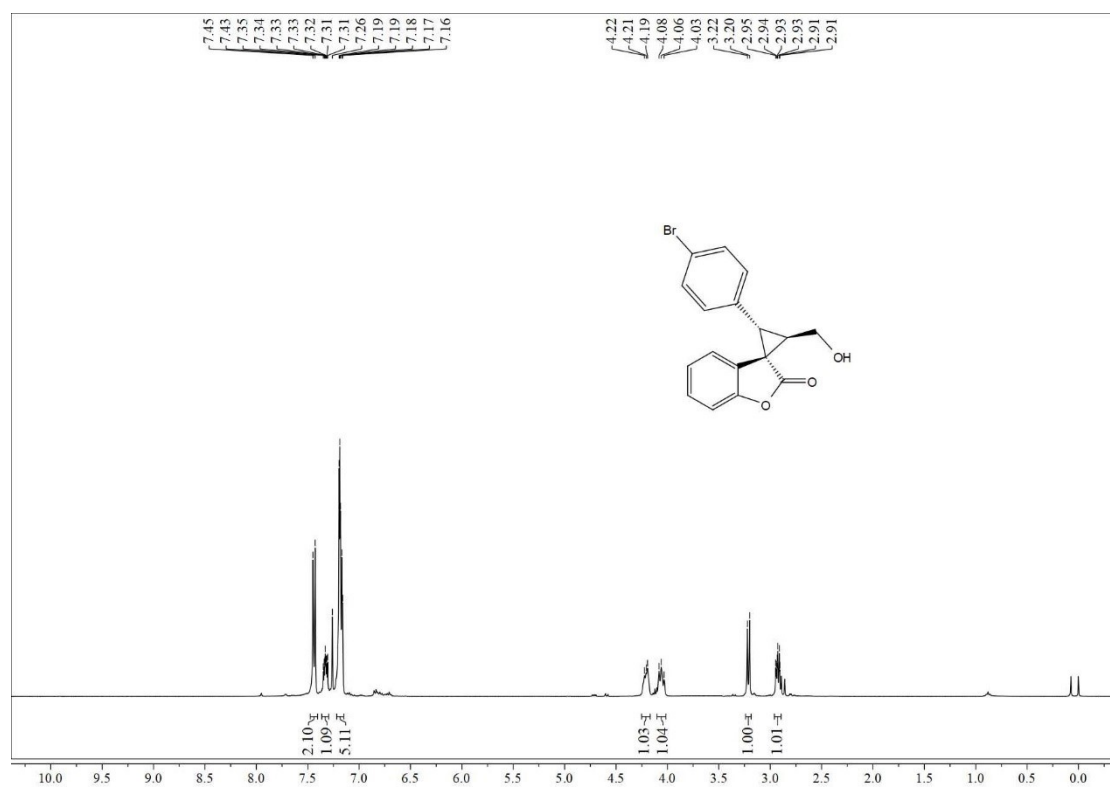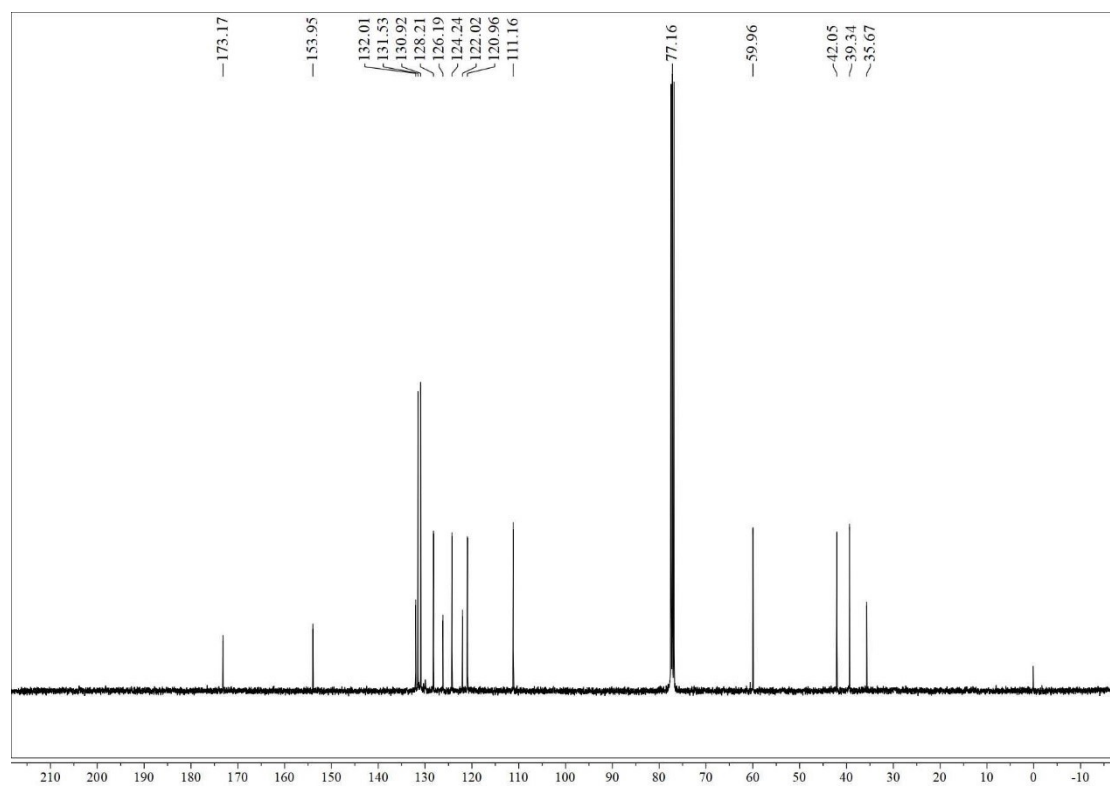

5k

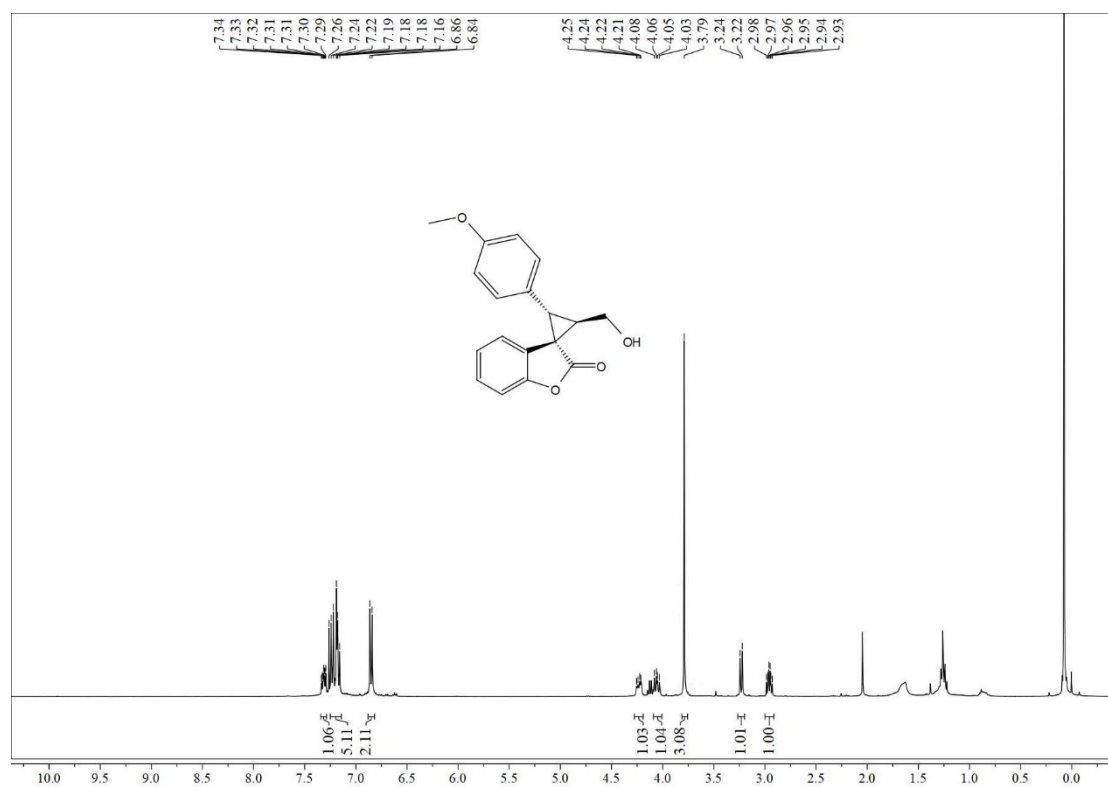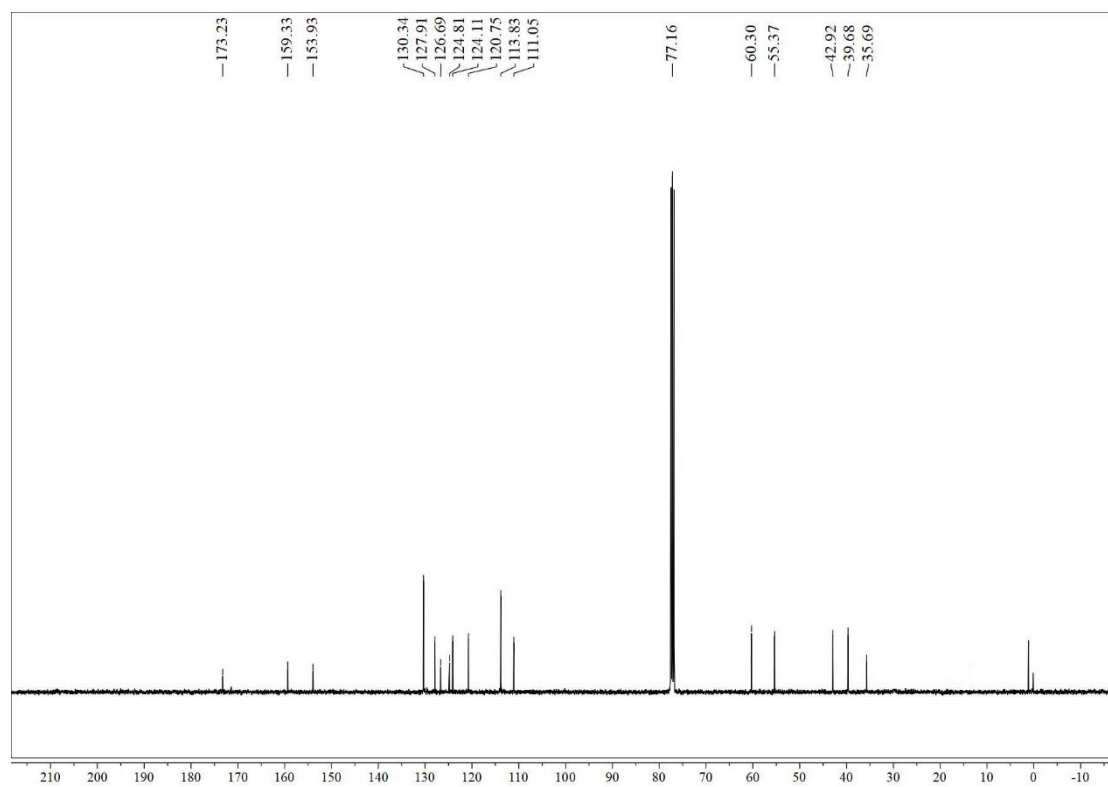

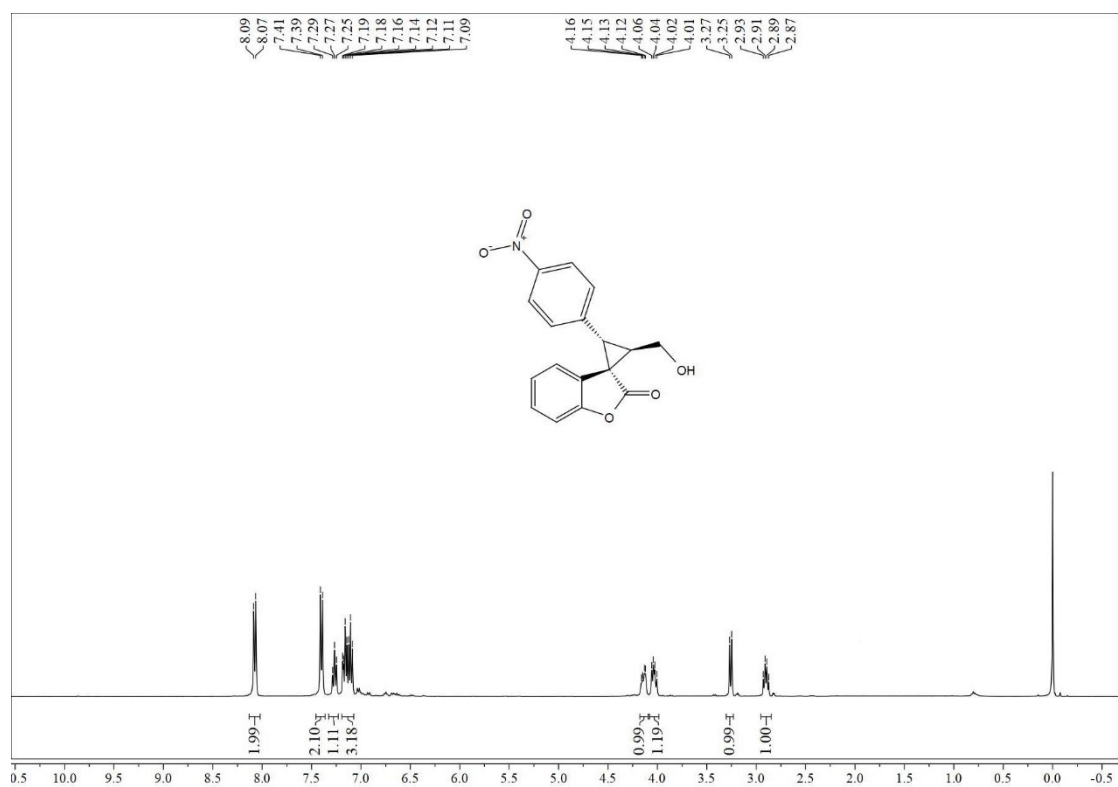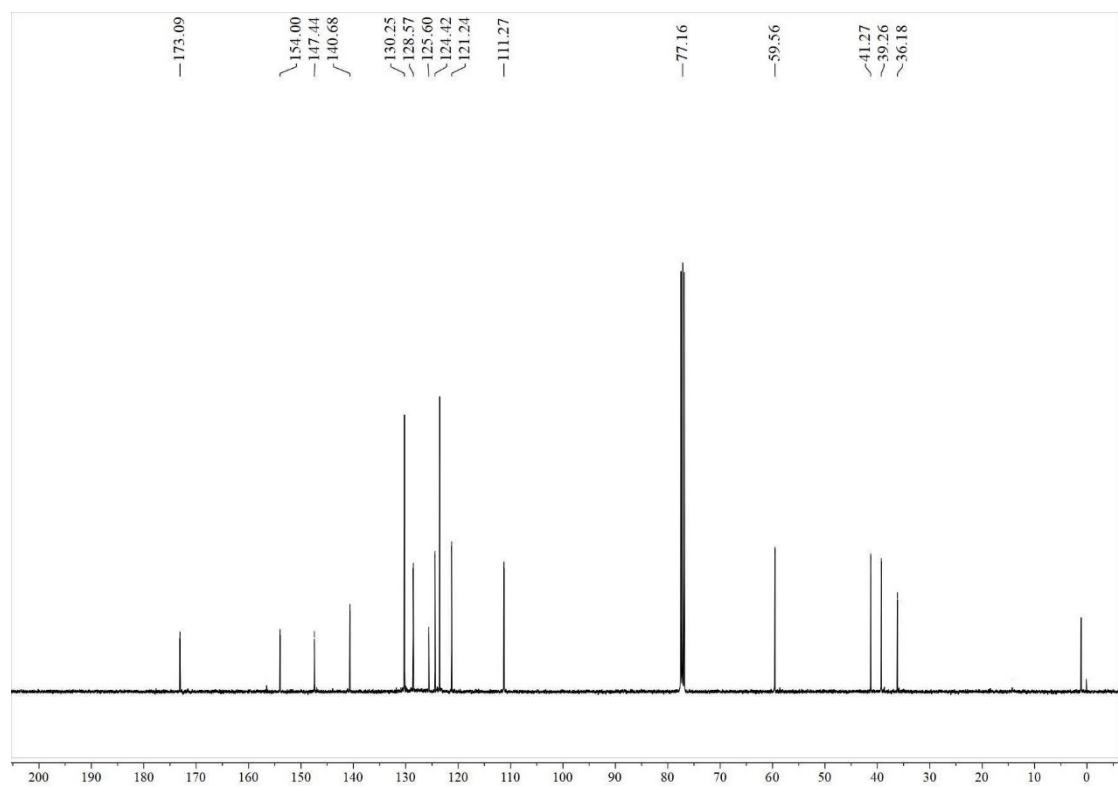

5m

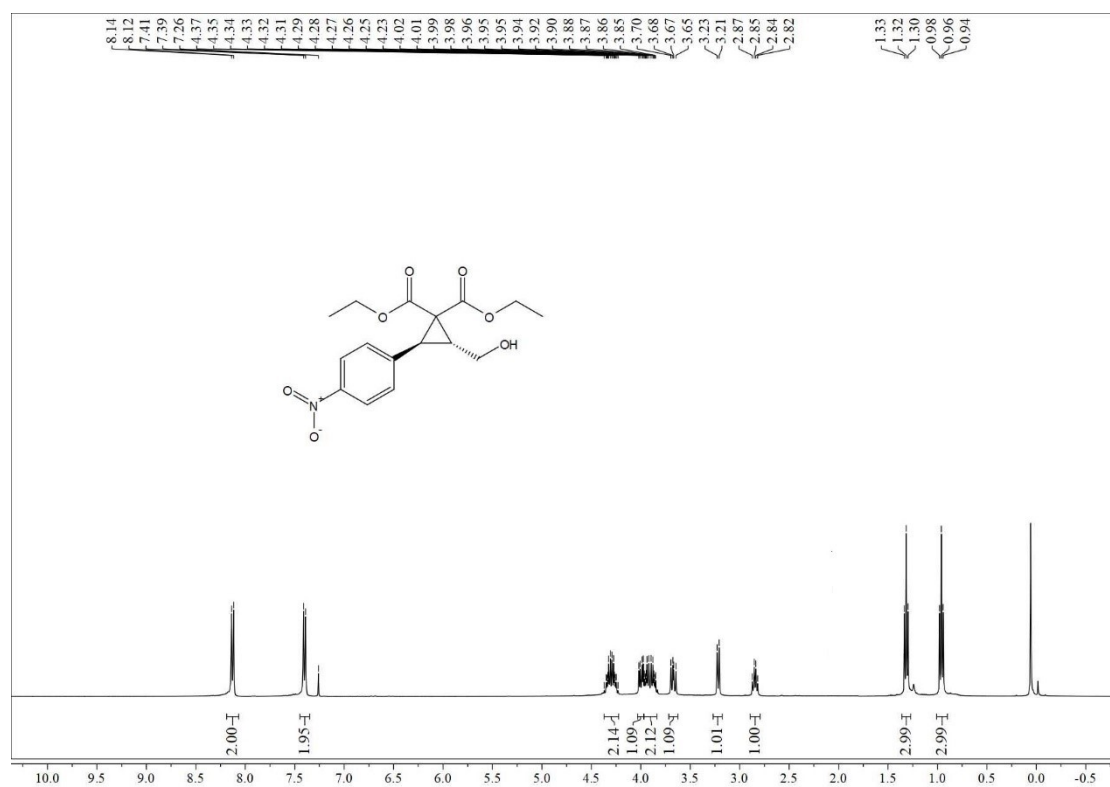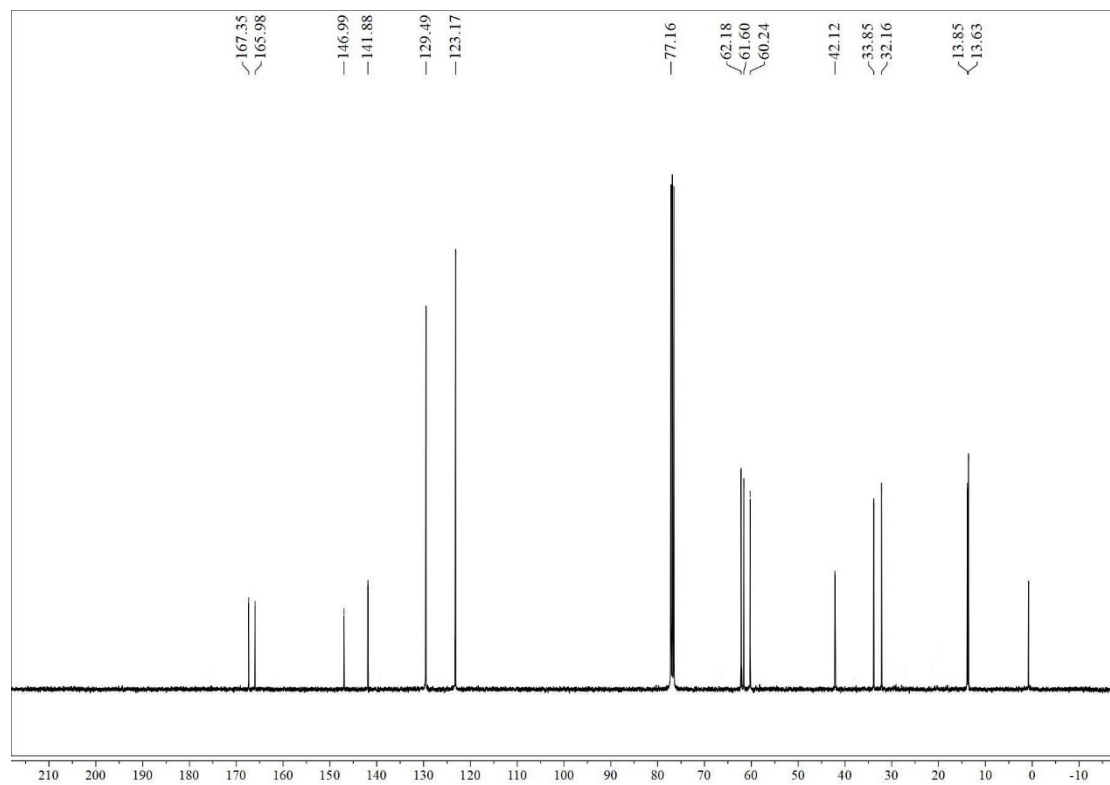

5n

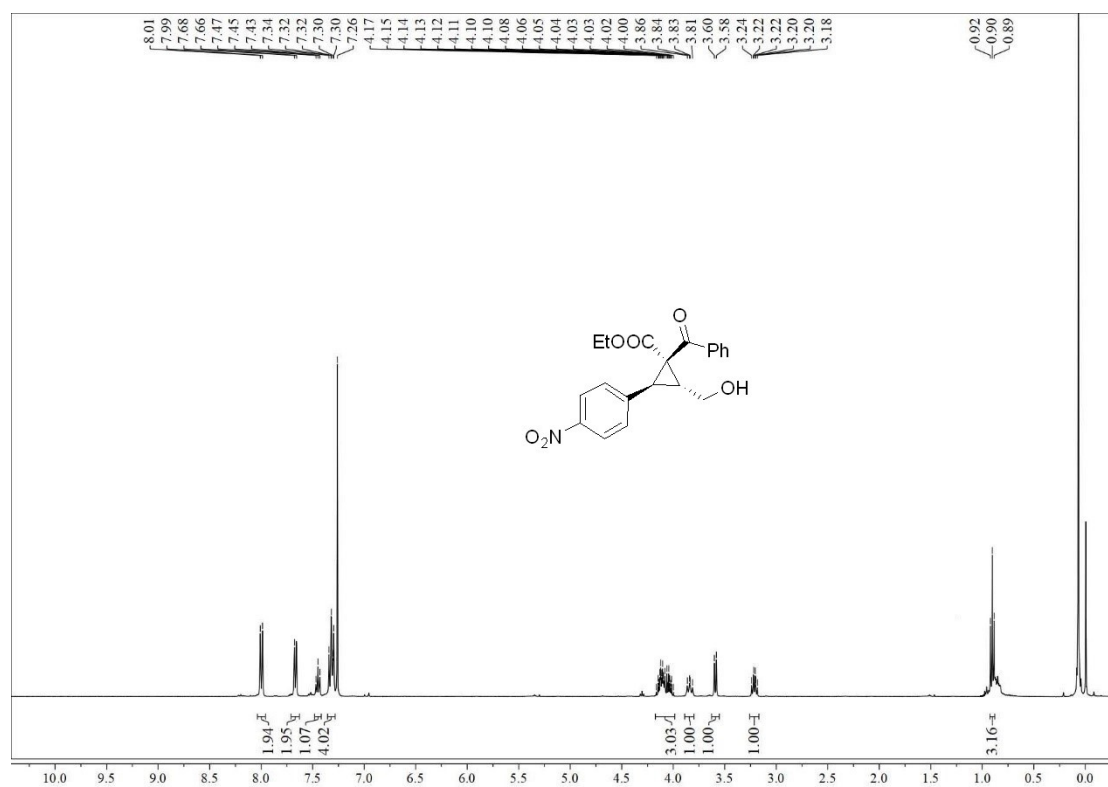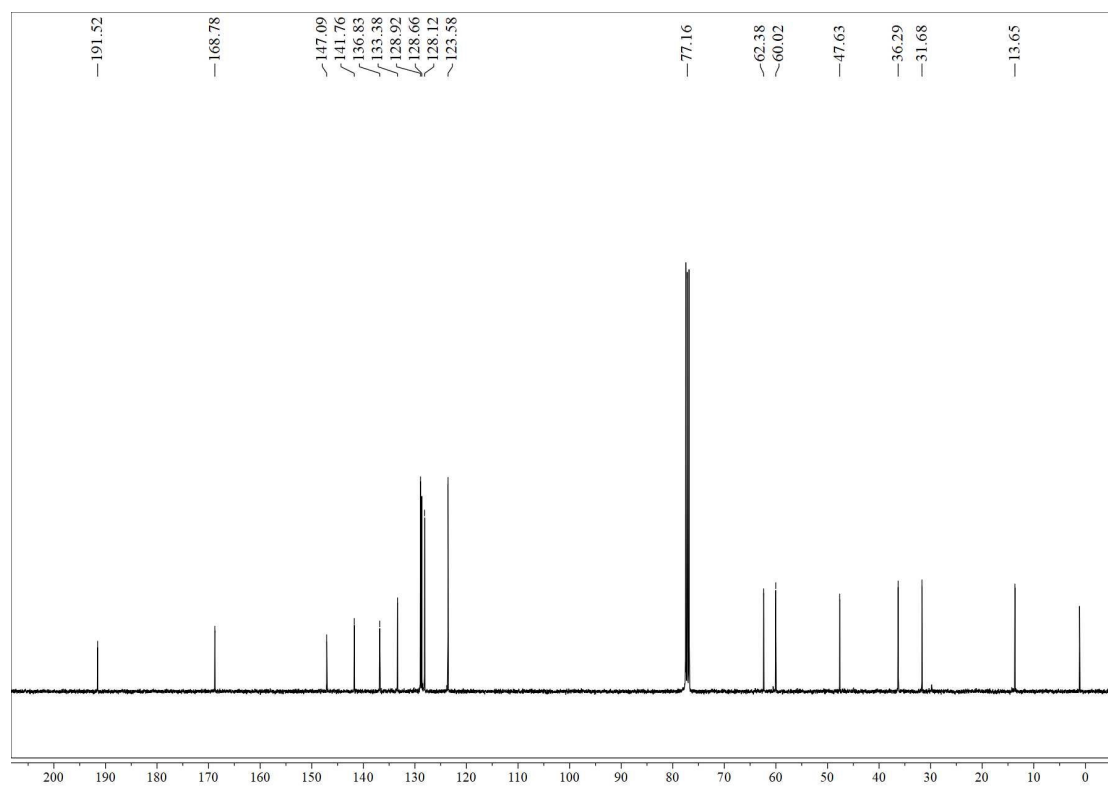

## 7. HPLC chromatograms

rac-3a

<Chromatogram>

mAU

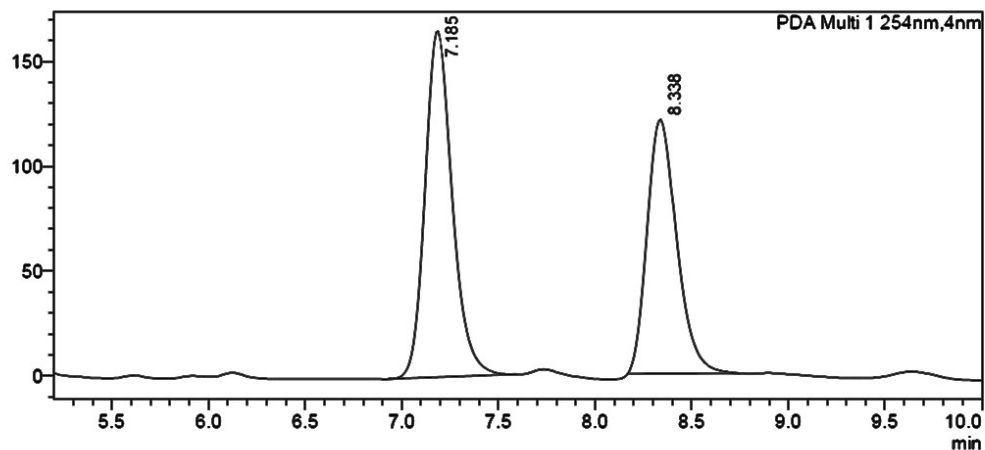

<Peak Table>

PDA Ch1 254nm

| Peak# | Ret. Time | Area    | Height | Conc.  | Unit | Mark | Name     |
|-------|-----------|---------|--------|--------|------|------|----------|
| 1     | 7.185     | 1625084 | 164919 | 55.897 | %    |      | RT:7.185 |
| 2     | 8.338     | 1282224 | 120903 | 44.103 | %    |      | RT:8.338 |
| Total |           | 2907308 | 285821 |        |      |      |          |

3a

<Chromatogram>

mAU

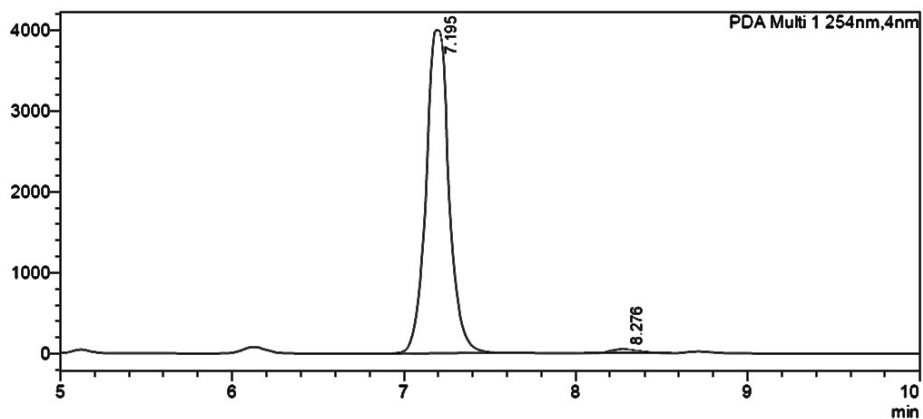

<Peak Table>

PDA Ch1 254nm

| Peak# | Ret. Time | Area     | Height  | Conc.  | Unit | Mark | Name     |
|-------|-----------|----------|---------|--------|------|------|----------|
| 1     | 7.195     | 37094100 | 3995820 | 98.368 | %    |      | RT:7.195 |
| 2     | 8.276     | 615583   | 52842   | 1.632  | %    |      | RT:8.275 |
| Total |           | 37709682 | 4048663 |        |      |      |          |

### rac-3b

#### <Chromatogram>

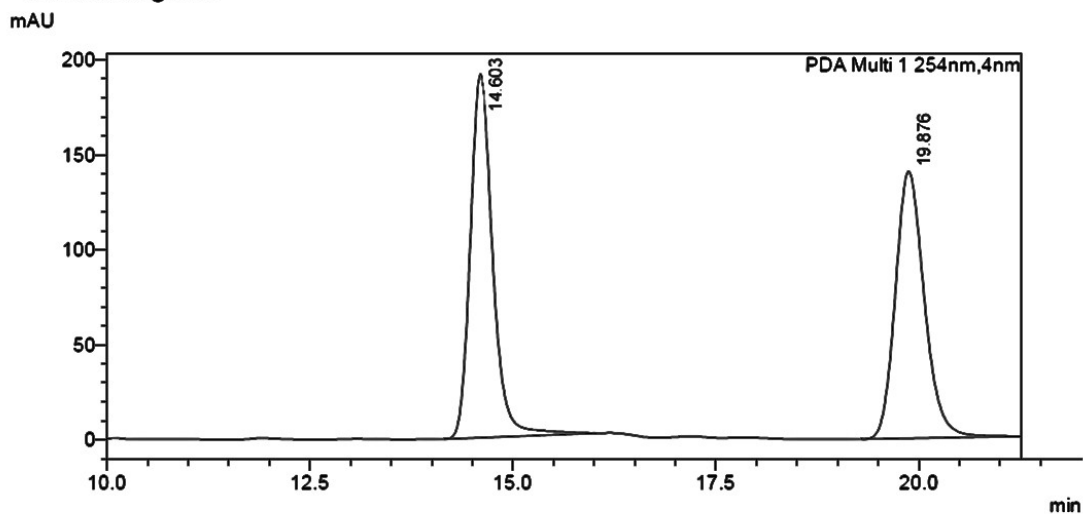

#### <Peak Table>

PDA Ch1 254nm

| Peak# | Ret. Time | Area    | Height | Conc.  | Unit | Mark | Name      |
|-------|-----------|---------|--------|--------|------|------|-----------|
| 1     | 14.603    | 3660543 | 191394 | 51.236 | %    |      | RT:14.603 |
| 2     | 19.876    | 3483894 | 140499 | 48.764 | %    |      | RT:19.876 |
| Total |           | 7144437 | 331893 |        |      |      |           |

### 3b

#### <Chromatogram>

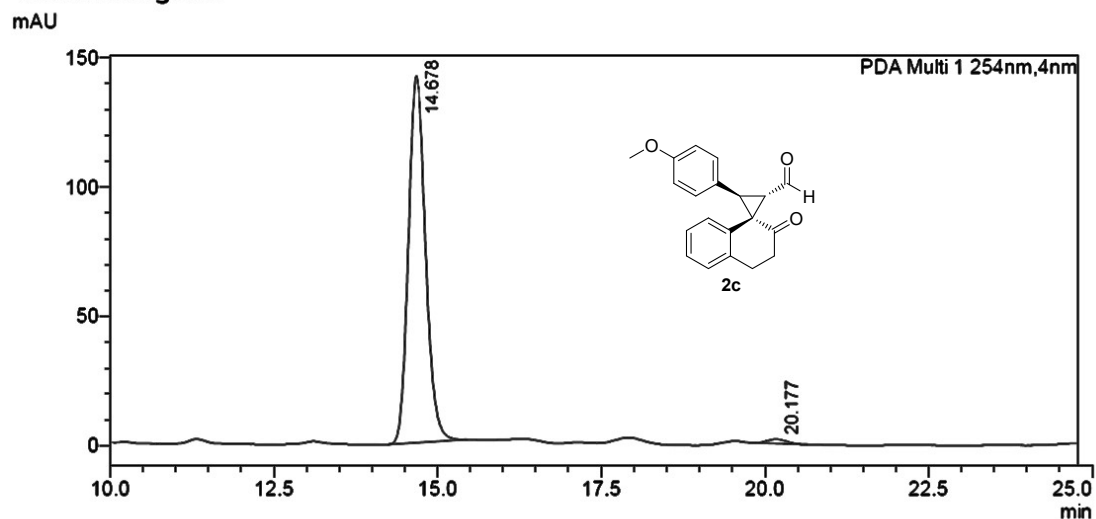

#### <Peak Table>

PDA Ch1 254nm

| Peak# | Ret. Time | Area    | Height | Conc.  | Unit | Mark | Name      |
|-------|-----------|---------|--------|--------|------|------|-----------|
| 1     | 14.678    | 2576997 | 141669 | 98.623 | %    |      | RT:14.678 |
| 2     | 20.177    | 35982   | 1724   | 1.377  | %    |      | RT:20.177 |
| Total |           | 2612980 | 143393 |        |      |      |           |



## rac-3c

### <Chromatogram>

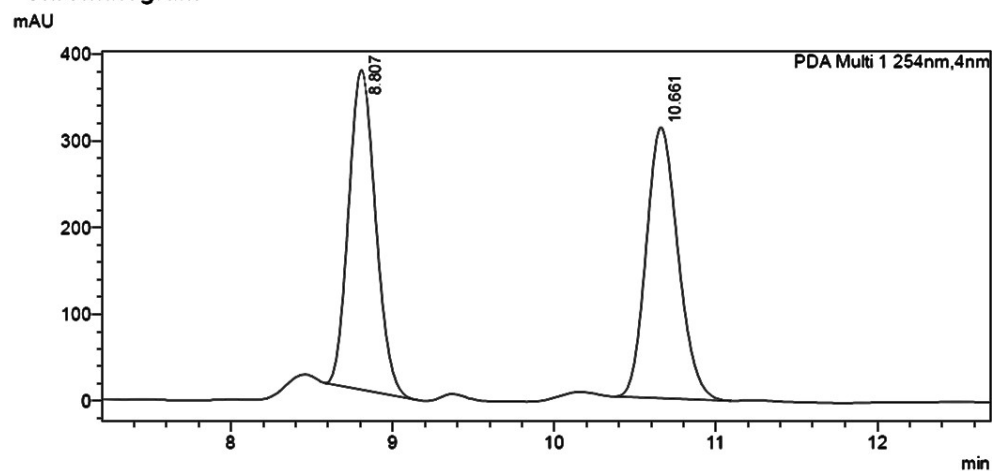

### <Peak Table>

PDA Ch1 254nm

| Peak# | Ret. Time | Area    | Height | Conc.  | Unit | Mark | Name      |
|-------|-----------|---------|--------|--------|------|------|-----------|
| 1     | 8.807     | 4269833 | 369185 | 49.921 | %    |      | RT:8.807  |
| 2     | 10.661    | 4283354 | 312346 | 50.079 | %    |      | RT:10.661 |
| Total |           | 8553187 | 681531 |        |      |      |           |

## 3c

### <Chromatogram>

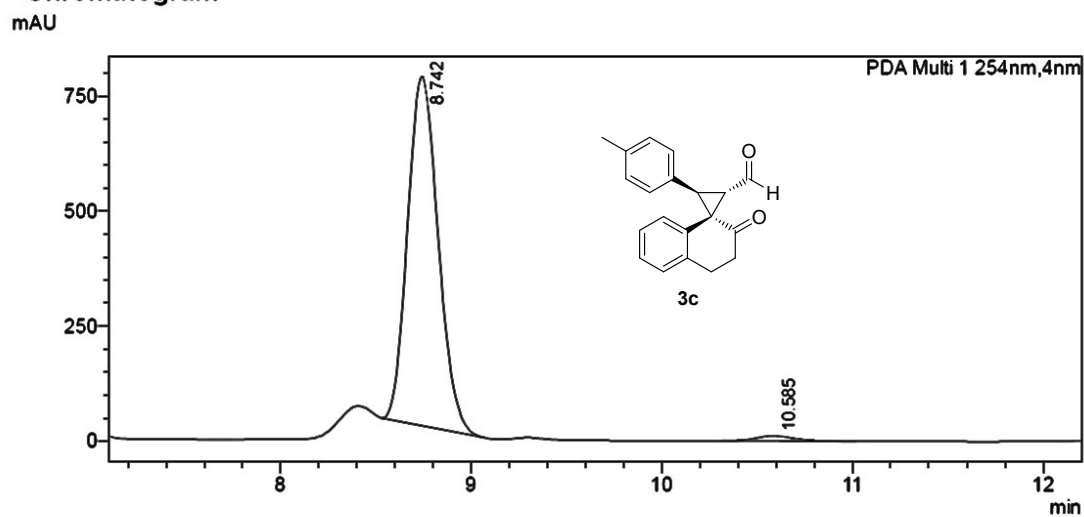

### <Peak Table>

PDA Ch1 254nm

| Peak# | Ret. Time | Area    | Height | Conc.  | Unit | Mark | Name      |
|-------|-----------|---------|--------|--------|------|------|-----------|
| 1     | 8.742     | 8443527 | 758528 | 98.273 | %    |      | RT:8.742  |
| 2     | 10.585    | 148339  | 10800  | 1.727  | %    |      | RT:10.585 |
| Total |           | 8591865 | 769328 |        |      |      |           |

### rac-3d

#### <Chromatogram>

mAU

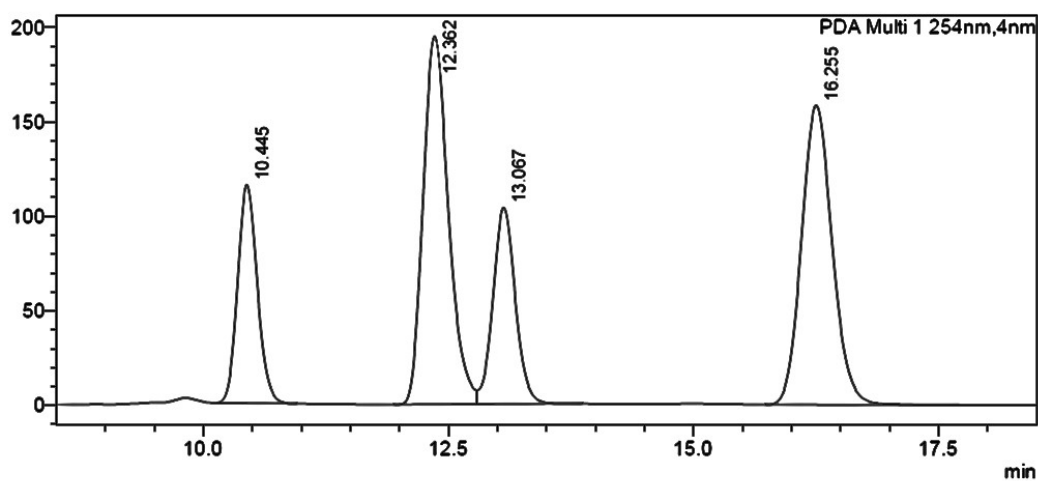

#### <Peak Table>

PDA Ch1 254nm

| Peak# | Ret. Time | Area     | Height | Conc.  | Unit | Mark | Name      |
|-------|-----------|----------|--------|--------|------|------|-----------|
| 1     | 10.445    | 1612432  | 115412 | 15.770 | %    |      | RT:10.445 |
| 2     | 12.362    | 3500279  | 194781 | 34.233 | %    |      | RT:12.362 |
| 3     | 13.067    | 1651823  | 104024 | 16.155 | %    | V    | RT:13.067 |
| 4     | 16.255    | 3460361  | 158392 | 33.843 | %    |      | RT:16.255 |
| Total |           | 10224895 | 572610 |        |      |      |           |

### 3d

#### <Chromatogram>

mAU

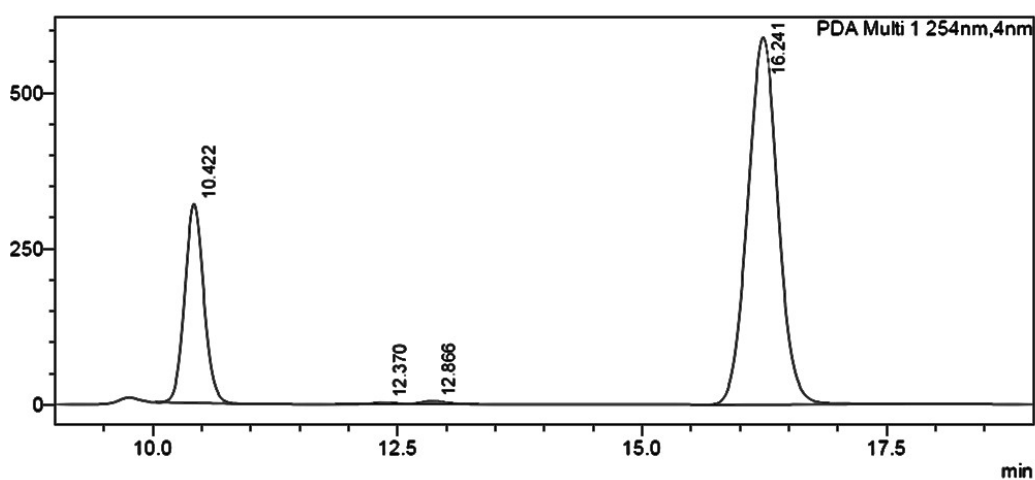

#### <Peak Table>

PDA Ch1 254nm

| Peak# | Ret. Time | Area     | Height | Conc.  | Unit | Mark | Name      |
|-------|-----------|----------|--------|--------|------|------|-----------|
| 1     | 10.422    | 4353504  | 319096 | 25.201 | %    |      | RT:10.422 |
| 2     | 12.370    | 57774    | 3482   | 0.334  | %    |      | RT:12.370 |
| 3     | 12.866    | 98875    | 5078   | 0.572  | %    | V    | RT:12.866 |
| 4     | 16.241    | 12765305 | 588509 | 73.893 | %    | S    | RT:16.241 |
| Total |           | 17275457 | 916166 |        |      |      |           |

### rac-3e

#### <Chromatogram>

mAU

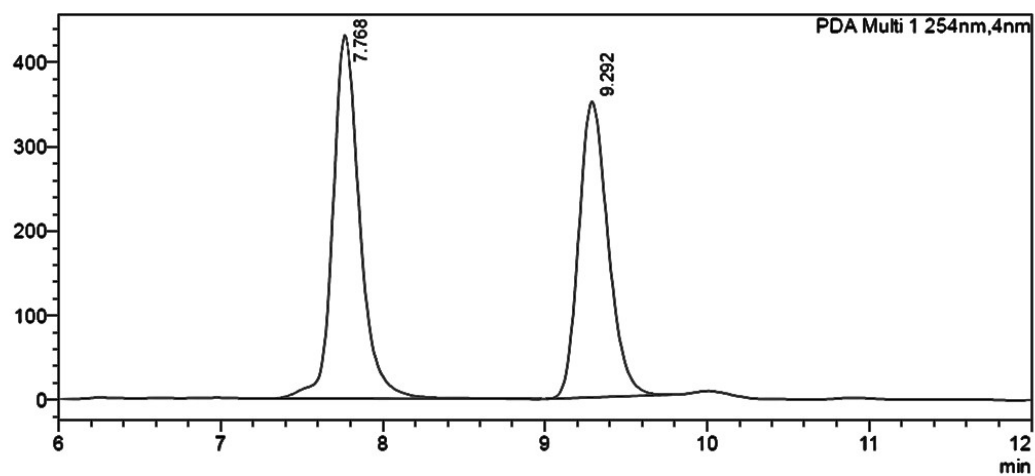

#### <Peak Table>

PDA Ch1 254nm

| Peak# | Ret. Time | Area    | Height | Conc.  | Unit | Mark | Name     |
|-------|-----------|---------|--------|--------|------|------|----------|
| 1     | 7.768     | 4993807 | 430735 | 53.116 | %    |      | RT:7.768 |
| 2     | 9.292     | 4407810 | 350532 | 46.884 | %    |      | RT:9.292 |
| Total |           | 9401617 | 781267 |        |      |      |          |

### 3e

#### <Chromatogram>

mAU

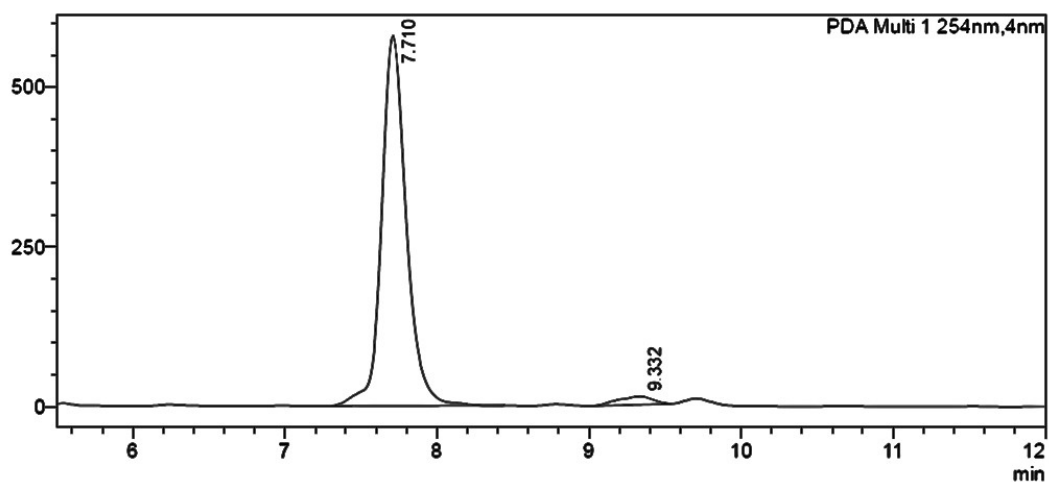

#### <Peak Table>

PDA Ch1 254nm

| Peak# | Ret. Time | Area    | Height | Conc.  | Unit | Mark | Name     |
|-------|-----------|---------|--------|--------|------|------|----------|
| 1     | 7.710     | 6509077 | 578558 | 96.957 | %    | S    | RT:7.710 |
| 2     | 9.332     | 204269  | 12721  | 3.043  | %    |      | RT:9.332 |
| Total |           | 6713346 | 591278 |        |      |      |          |

## Rac-3f

### <Chromatogram>

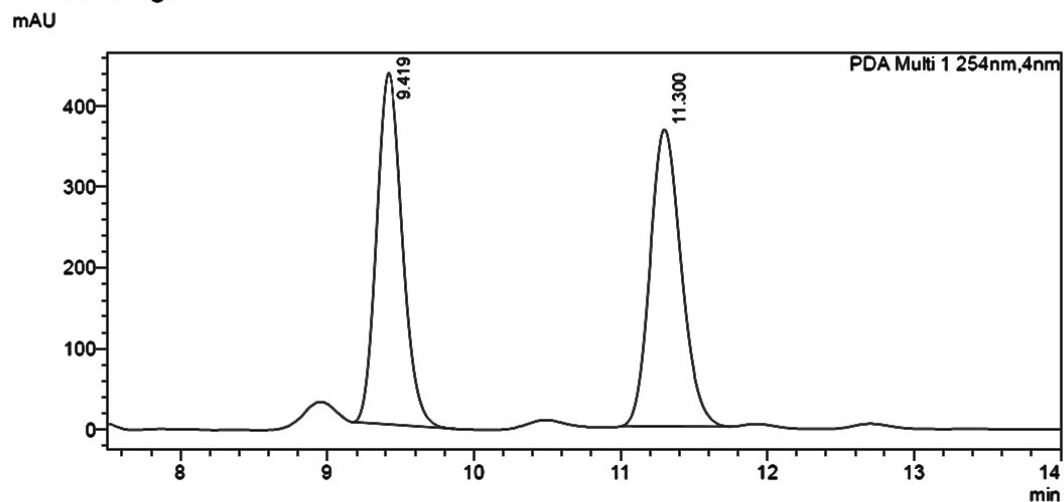

### <Peak Table>

| PDA Ch1 254nm |           |          |        |        |      |      |           |
|---------------|-----------|----------|--------|--------|------|------|-----------|
| Peak#         | Ret. Time | Area     | Height | Conc.  | Unit | Mark | Name      |
| 1             | 9.419     | 5297143  | 434950 | 49.389 | %    |      | RT:9.419  |
| 2             | 11.300    | 5428298  | 367273 | 50.611 | %    |      | RT:11.300 |
| Total         |           | 10725441 | 802223 |        |      |      |           |

## 3f

### <Chromatogram>

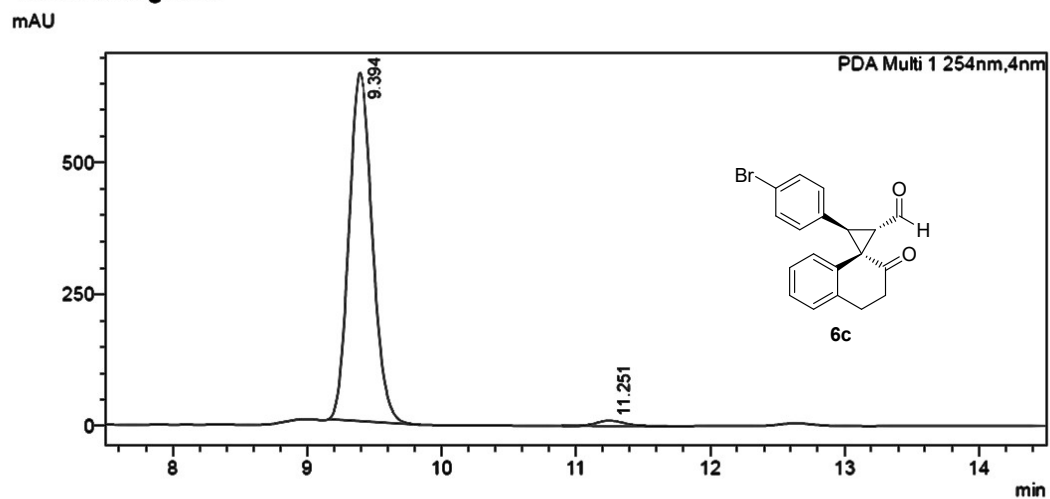

### <Peak Table>

| PDA Ch1 254nm |           |         |        |        |      |      |           |
|---------------|-----------|---------|--------|--------|------|------|-----------|
| Peak#         | Ret. Time | Area    | Height | Conc.  | Unit | Mark | Name      |
| 1             | 9.394     | 7936514 | 662037 | 98.074 | %    |      | RT:9.394  |
| 2             | 11.251    | 155848  | 10219  | 1.926  | %    |      | RT:11.251 |
| Total         |           | 8092362 | 672256 |        |      |      |           |

### rac-3g

#### <Chromatogram>

mAU

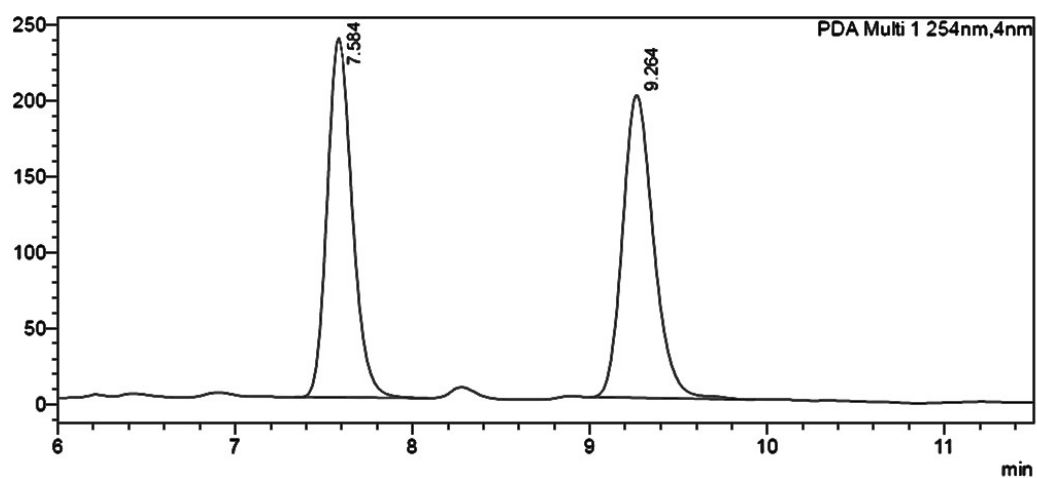

#### <Peak Table>

PDA Ch1 254nm

| Peak# | Ret. Time | Area    | Height | Conc.  | Unit | Mark | Name     |
|-------|-----------|---------|--------|--------|------|------|----------|
| 1     | 7.584     | 2325033 | 236774 | 48.903 | %    |      | RT:7.584 |
| 2     | 9.264     | 2429382 | 199376 | 51.097 | %    |      | RT:9.264 |
| Total |           | 4754414 | 436151 |        |      |      |          |

### 3g

#### <Chromatogram>

mAU

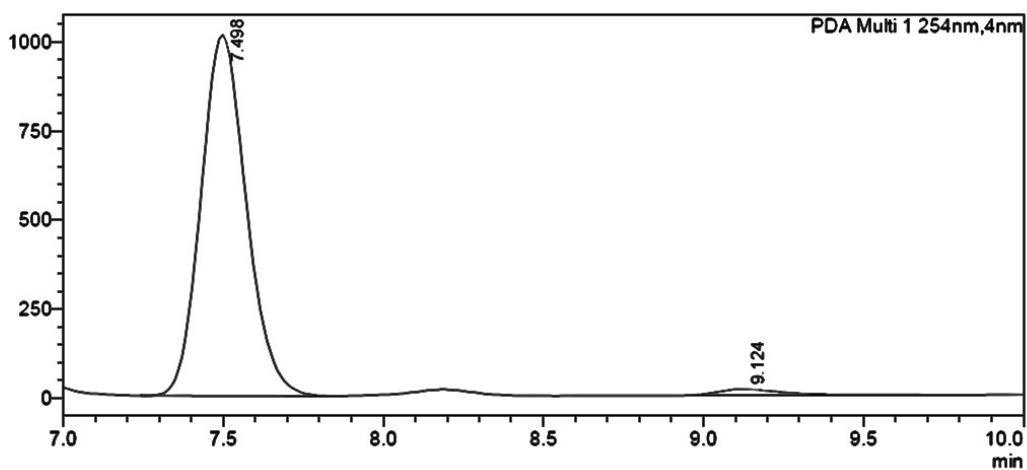

#### <Peak Table>

PDA Ch1 254nm

| Peak# | Ret. Time | Area     | Height  | Conc.  | Unit | Mark | Name     |
|-------|-----------|----------|---------|--------|------|------|----------|
| 1     | 7.498     | 9968180  | 1012193 | 97.591 | %    |      | RT:7.498 |
| 2     | 9.124     | 246061   | 17216   | 2.409  | %    |      | RT:9.124 |
| Total |           | 10214240 | 1029410 |        |      |      |          |

### rac-3h

#### <Chromatogram>

mAU

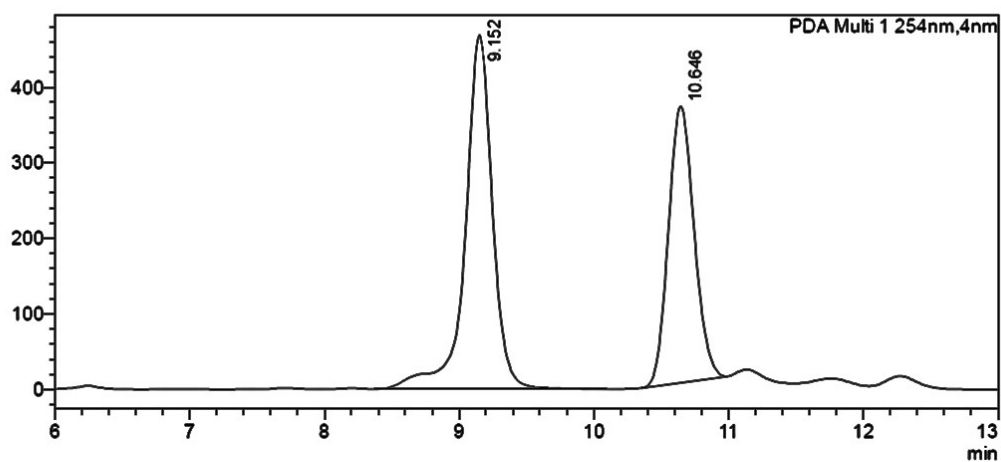

#### <Peak Table>

PDA Ch1 254nm

| Peak# | Ret. Time | Area     | Height | Conc.  | Unit | Mark | Name      |
|-------|-----------|----------|--------|--------|------|------|-----------|
| 1     | 9.152     | 6603098  | 468678 | 57.764 | %    |      | RT:9.152  |
| 2     | 10.646    | 4828084  | 365765 | 42.236 | %    |      | RT:10.646 |
| Total |           | 11431182 | 834444 |        |      |      |           |

### 3h

#### <Chromatogram>

mAU

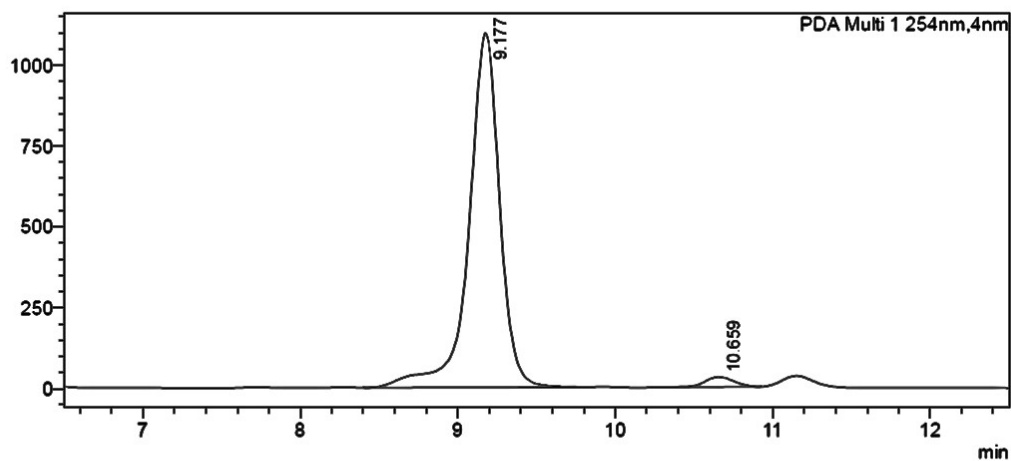

#### <Peak Table>

PDA Ch1 254nm

| Peak# | Ret. Time | Area     | Height  | Conc.  | Unit | Mark | Name     |
|-------|-----------|----------|---------|--------|------|------|----------|
| 1     | 9.177     | 14962314 | 1095803 | 97.454 | %    |      | RT:9.177 |
| 2     | 10.659    | 390816   | 30577   | 2.546  | %    |      |          |
| Total |           | 15353130 | 1126381 |        |      |      |          |

### rac-3i

#### <Chromatogram>

mAU

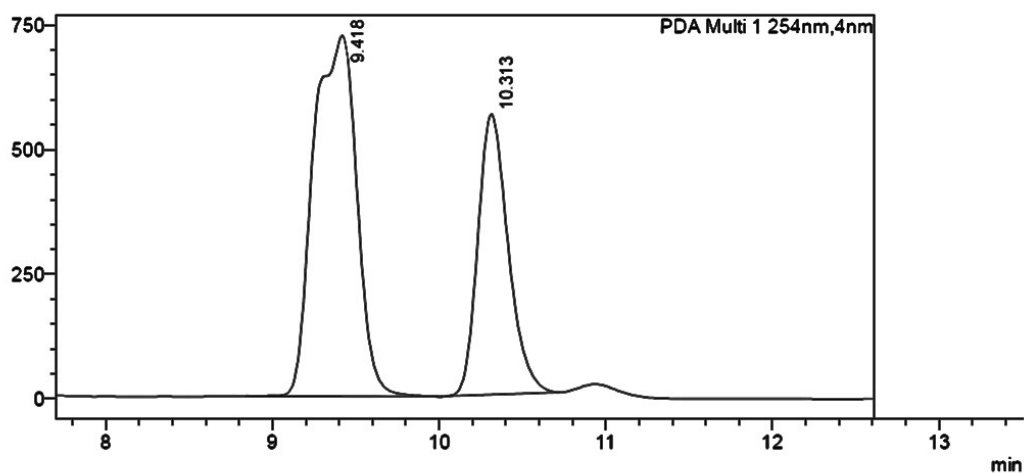

#### <Peak Table>

PDA Ch1 254nm

| Peak# | Ret. Time | Area     | Height  | Conc.  | Unit | Mark | Name      |
|-------|-----------|----------|---------|--------|------|------|-----------|
| 1     | 9.418     | 13034483 | 724730  | 64.624 | %    |      | RT:9.418  |
| 2     | 10.313    | 7135196  | 563522  | 35.376 | %    |      | RT:10.313 |
| Total |           | 20169679 | 1288253 |        |      |      |           |

### 3i

#### <Chromatogram>

mAU

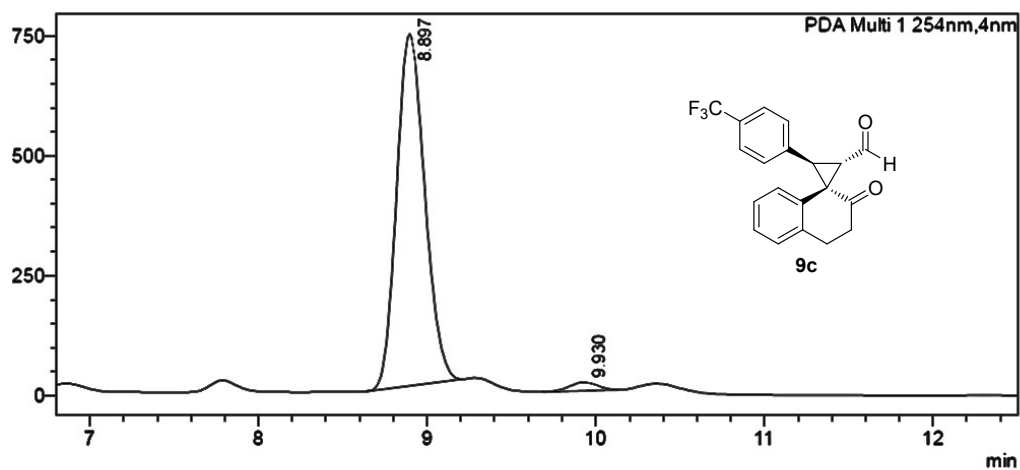

#### <Peak Table>

PDA Ch1 254nm

| Peak# | Ret. Time | Area    | Height | Conc.  | Unit | Mark | Name     |
|-------|-----------|---------|--------|--------|------|------|----------|
| 1     | 8.897     | 8514708 | 733227 | 97.657 | %    |      | RT:8.897 |
| 2     | 9.930     | 204251  | 17544  | 2.343  | %    |      | RT:9.930 |
| Total |           | 8718959 | 750770 |        |      |      |          |

# rac-3j

## <Chromatogram>

mAU

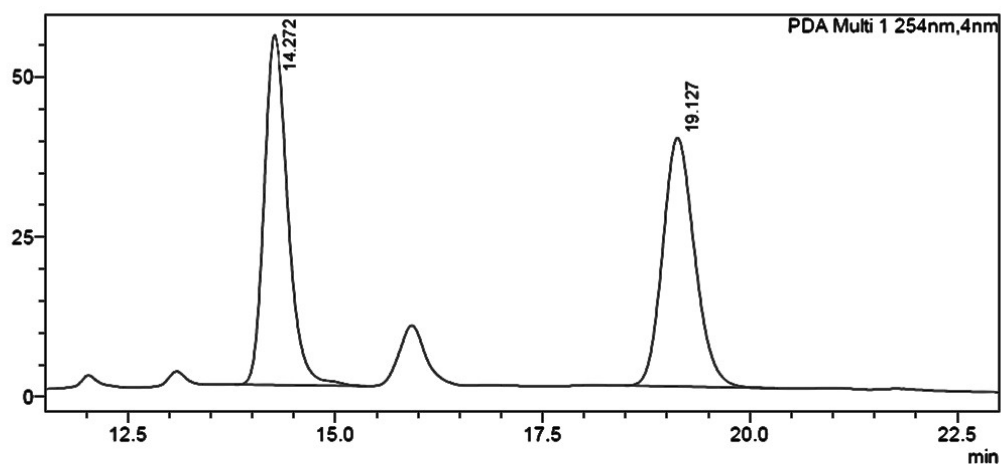

## <Peak Table>

PDA Ch1 254nm

| Peak# | Ret. Time | Area    | Height | Conc.  | Unit | Mark | Name      |
|-------|-----------|---------|--------|--------|------|------|-----------|
| 1     | 14.272    | 1078477 | 54804  | 50.737 | %    |      | RT:14.272 |
| 2     | 19.127    | 1047140 | 38916  | 49.263 | %    |      | RT:19.127 |
| Total |           | 2125617 | 93720  |        |      |      |           |

# 3j

## <Chromatogram>

mAU

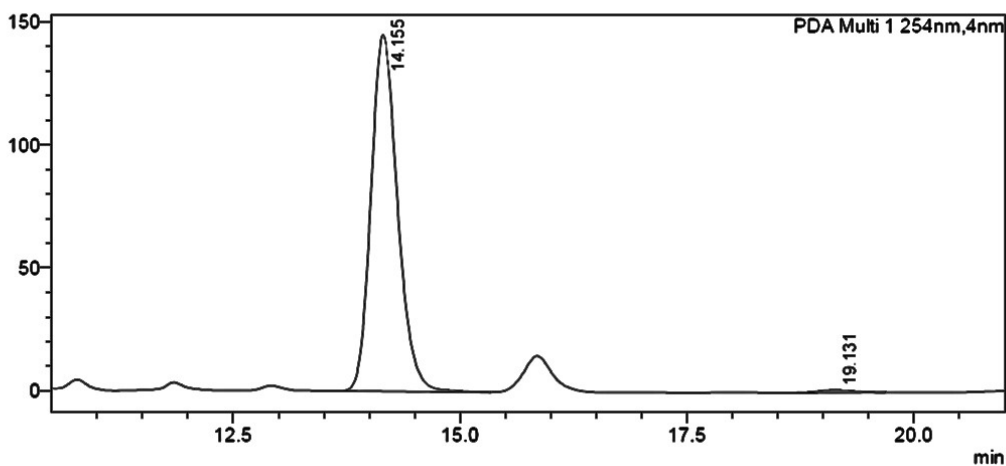

## <Peak Table>

PDA Ch1 254nm

| Peak# | Ret. Time | Area    | Height | Conc.  | Unit | Mark | Name      |
|-------|-----------|---------|--------|--------|------|------|-----------|
| 1     | 14.155    | 2952405 | 145004 | 99.025 | %    |      | RT:14.155 |
| 2     | 19.131    | 29079   | 1093   | 0.975  | %    |      | RT:19.131 |
| Total |           | 2981484 | 146097 |        |      |      |           |



### rac-3k

#### <Chromatogram>

mAU

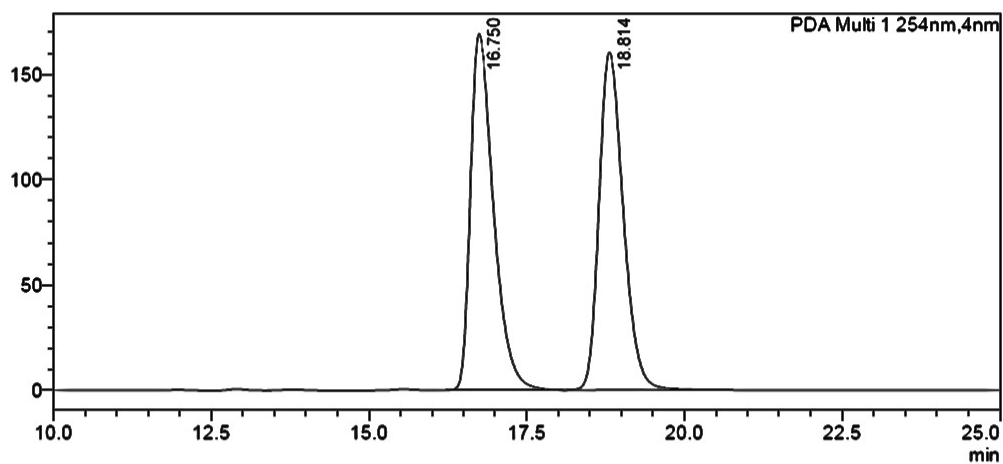

#### <Peak Table>

PDA Ch1 254nm

| Peak# | Ret. Time | Area    | Height | Conc.  | Unit | Mark | Name      |
|-------|-----------|---------|--------|--------|------|------|-----------|
| 1     | 16.750    | 4285807 | 169183 | 50.048 | %    |      | RT:16.750 |
| 2     | 18.814    | 4277580 | 160308 | 49.952 | %    |      | RT:18.814 |
| Total |           | 8563387 | 329490 |        |      |      |           |

### 3k

#### <Chromatogram>

mAU

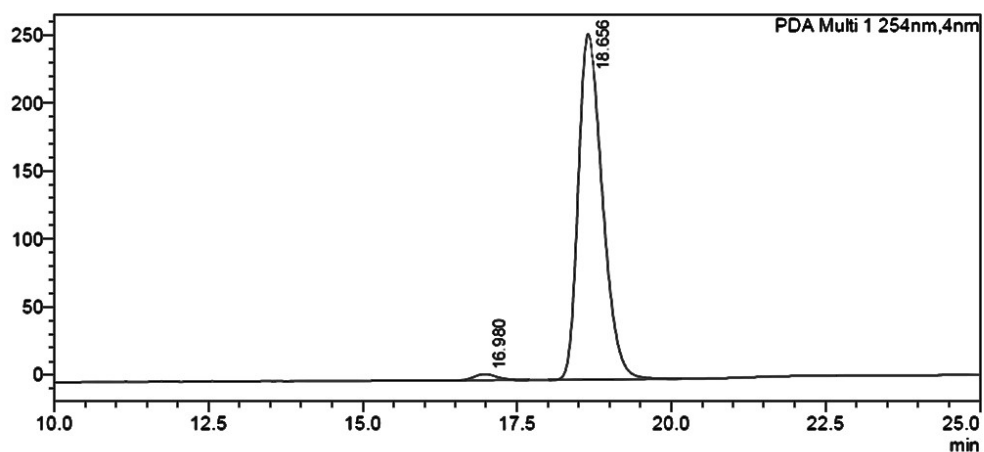

#### <Peak Table>

PDA Ch1 254nm

| Peak# | Ret. Time | Area    | Height | Conc.  | Unit | Mark | Name      |
|-------|-----------|---------|--------|--------|------|------|-----------|
| 1     | 16.980    | 118008  | 4587   | 1.679  | %    |      | RT:16.980 |
| 2     | 18.656    | 6909767 | 254188 | 98.321 | %    |      | RT:18.656 |
| Total |           | 7027775 | 258775 |        |      |      |           |

# rac-3I

## <Chromatogram>

mAU

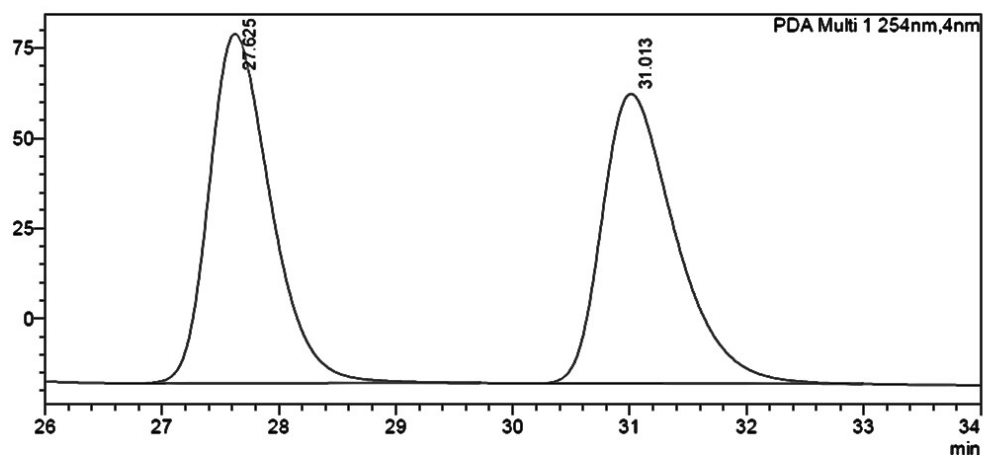

## <Peak Table>

PDA Ch1 254nm

| Peak# | Ret. Time | Area    | Height | Conc.  | Unit | Mark | Name      |
|-------|-----------|---------|--------|--------|------|------|-----------|
| 1     | 27.625    | 3547897 | 96746  | 50.197 | %    |      | RT:27.625 |
| 2     | 31.013    | 3520068 | 80267  | 49.803 | %    |      | RT:31.013 |
| Total |           | 7067965 | 177013 |        |      |      |           |

# 3I

## <Chromatogram>

mAU

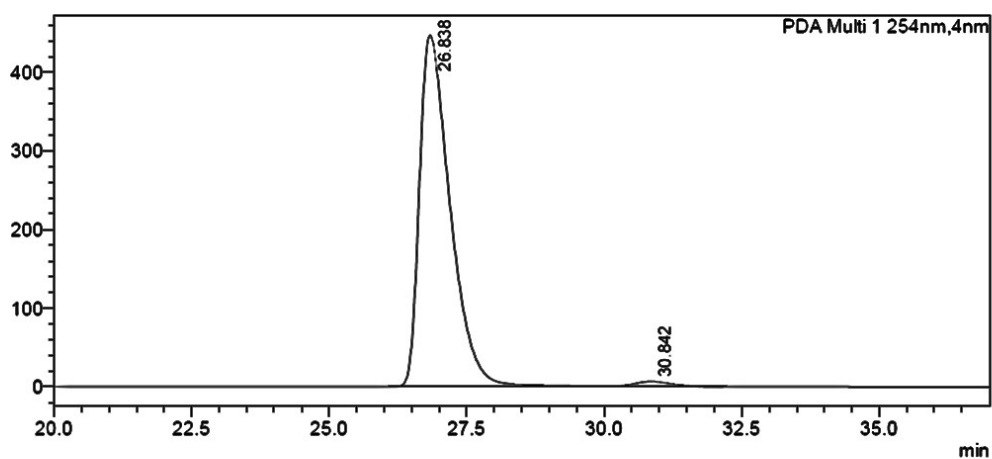

## <Peak Table>

PDA Ch1 254nm

| Peak# | Ret. Time | Area     | Height | Conc.  | Unit | Mark | Name      |
|-------|-----------|----------|--------|--------|------|------|-----------|
| 1     | 26.838    | 17425730 | 447587 | 98.415 | %    | S    | RT:26.838 |
| 2     | 30.842    | 280669   | 6185   | 1.585  | %    | T    | RT:30.842 |
| Total |           | 17706399 | 453773 |        |      |      |           |

### rac-3m

#### <Chromatogram>

mAU

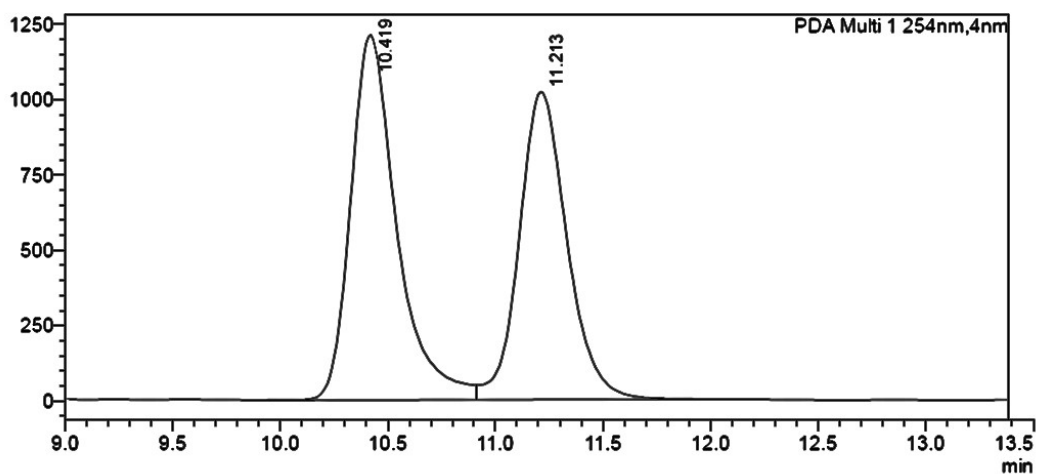

#### <Peak Table>

PDA Ch1 254nm

| Peak# | Ret. Time | Area     | Height  | Conc.  | Unit | Mark | Name      |
|-------|-----------|----------|---------|--------|------|------|-----------|
| 1     | 10.419    | 18025853 | 1210600 | 53.367 | %    |      | RT:10.419 |
| 2     | 11.213    | 15751184 | 1020960 | 46.633 | %    | SV   | RT:11.213 |
| Total |           | 33777037 | 2231560 |        |      |      |           |

### 3m

#### <Chromatogram>

mAU

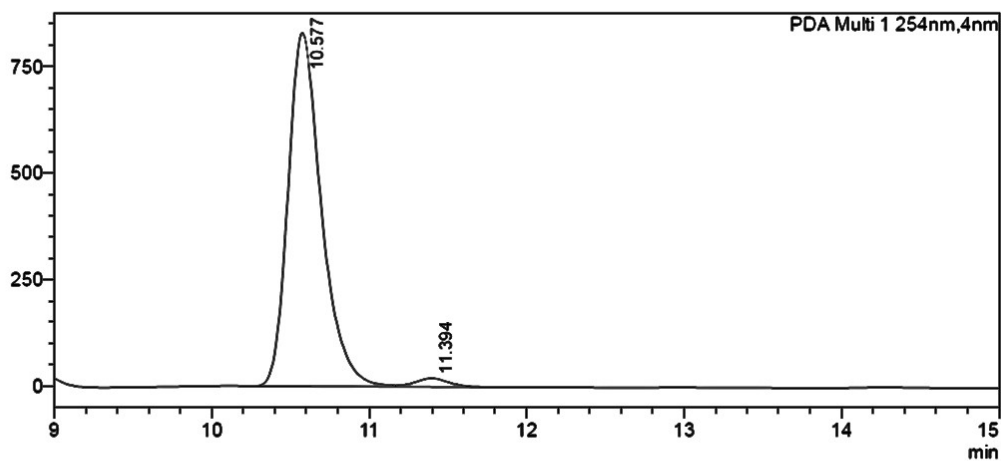

#### <Peak Table>

PDA Ch1 254nm

| Peak# | Ret. Time | Area     | Height | Conc.  | Unit | Mark | Name      |
|-------|-----------|----------|--------|--------|------|------|-----------|
| 1     | 10.577    | 12206637 | 828311 | 97.606 | %    |      | RT:10.577 |
| 2     | 11.394    | 299351   | 20041  | 2.394  | %    | V    | RT:11.394 |
| Total |           | 12505988 | 848352 |        |      |      |           |

### rac-3n

#### <Chromatogram>

mAU

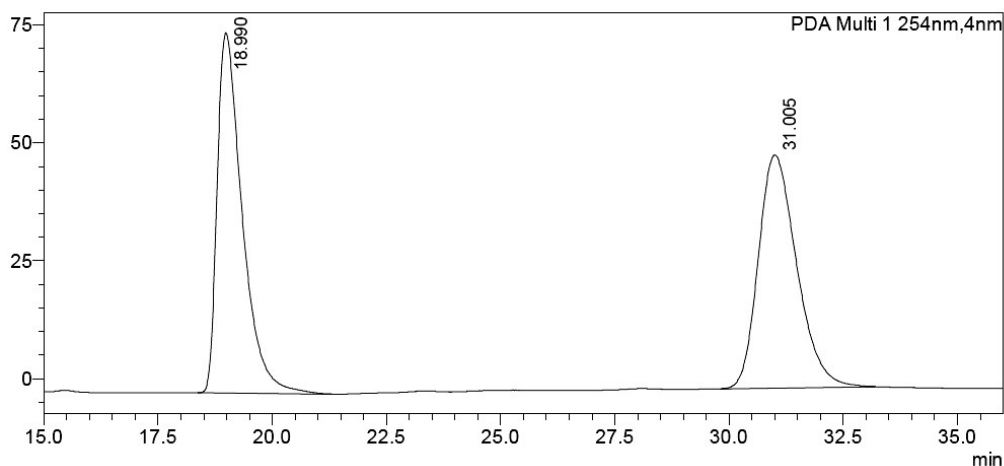

#### <Peak Table>

PDA Ch1 254nm

| Peak# | Ret. Time | Area    | Height | Conc.  | Unit | Mark | Name      |
|-------|-----------|---------|--------|--------|------|------|-----------|
| 1     | 18.990    | 2915213 | 76354  | 50.256 | %    |      | RT:18.990 |
| 2     | 31.005    | 2885569 | 49403  | 49.744 | %    |      | RT:31.005 |
| Total |           | 5800782 | 125757 |        |      |      |           |

### 3n

#### <Chromatogram>

mAU

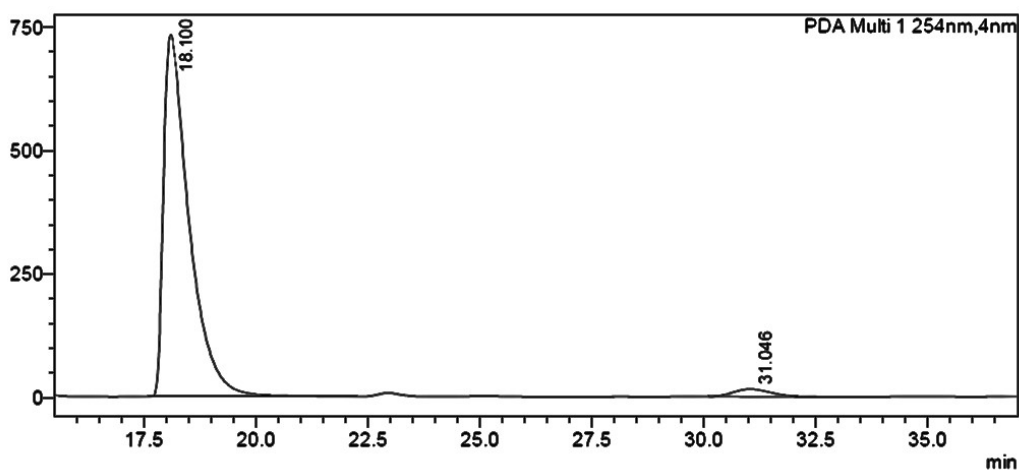

#### <Peak Table>

PDA Ch1 254nm

| Peak# | Ret. Time | Area     | Height | Conc.  | Unit | Mark | Name      |
|-------|-----------|----------|--------|--------|------|------|-----------|
| 1     | 18.100    | 29132531 | 732763 | 97.046 | %    |      | RT:18.100 |
| 2     | 31.046    | 886771   | 15263  | 2.954  | %    |      | RT:31.046 |
| Total |           | 30019302 | 748026 |        |      |      |           |

### rac-3o

#### <Chromatogram>

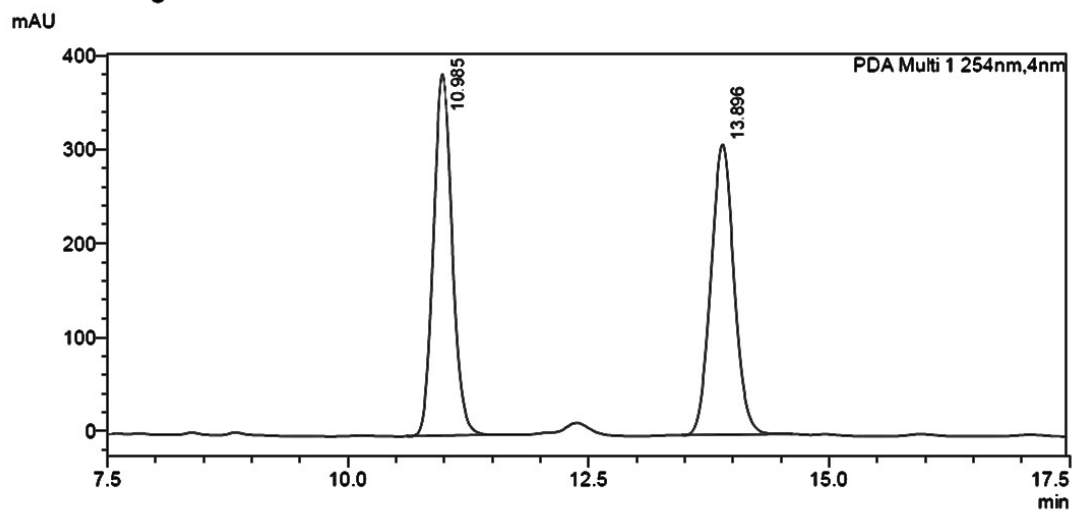

#### <Peak Table>

PDA Ch1 254nm

| Peak# | Ret. Time | Area     | Height | Conc.  | Unit | Mark | Name      |
|-------|-----------|----------|--------|--------|------|------|-----------|
| 1     | 10.985    | 5206365  | 385221 | 50.189 | %    |      | RT:10.985 |
| 2     | 13.896    | 5167179  | 309139 | 49.811 | %    | S    | RT:13.896 |
| Total |           | 10373544 | 694361 |        |      |      |           |

### 3o

#### <Chromatogram>

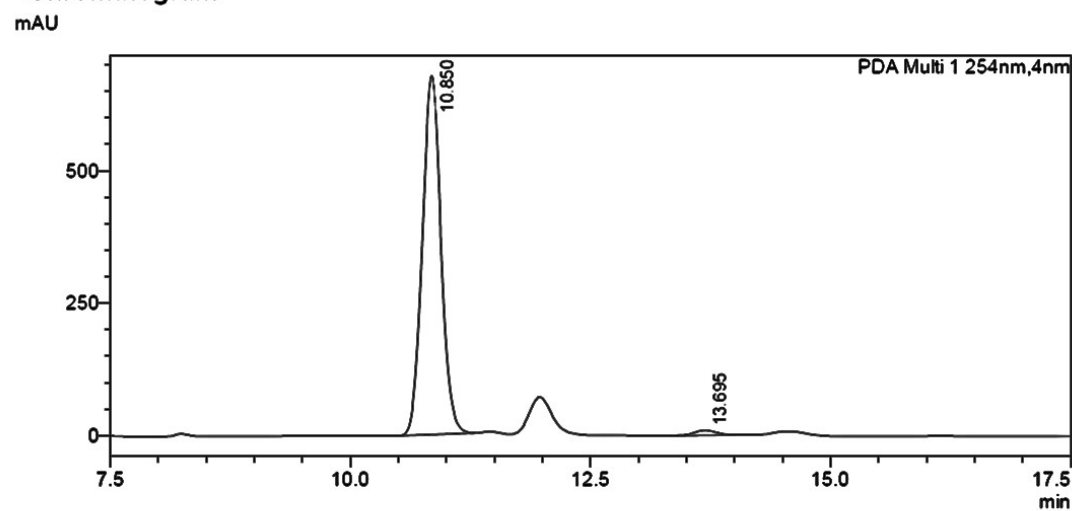

#### <Peak Table>

PDA Ch1 254nm

| Peak# | Ret. Time | Area    | Height | Conc.  | Unit | Mark | Name      |
|-------|-----------|---------|--------|--------|------|------|-----------|
| 1     | 10.850    | 9148032 | 676913 | 98.346 | %    |      | RT:10.850 |
| 2     | 13.695    | 153829  | 9330   | 1.654  | %    |      | RT:13.695 |
| Total |           | 9301860 | 686243 |        |      |      |           |

### rac-3p

#### <Chromatogram>

mAU

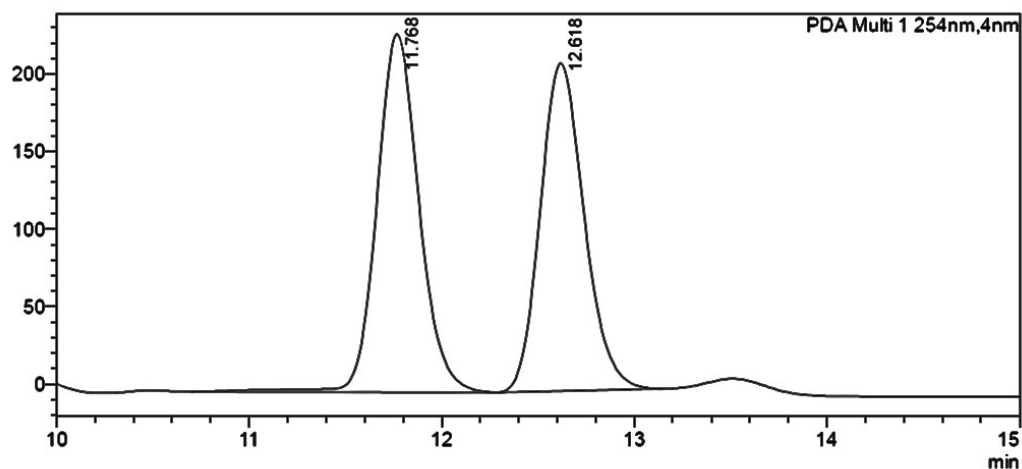

#### <Peak Table>

PDA Ch1 254nm

| Peak# | Ret. Time | Area    | Height | Conc.  | Unit | Mark | Name      |
|-------|-----------|---------|--------|--------|------|------|-----------|
| 1     | 11.768    | 3520111 | 230818 | 51.267 | %    |      | RT:11.768 |
| 2     | 12.618    | 3346083 | 211529 | 48.733 | %    |      | RT:12.618 |
| Total |           | 6866194 | 442347 |        |      |      |           |

### 3p

#### <Chromatogram>

mAU

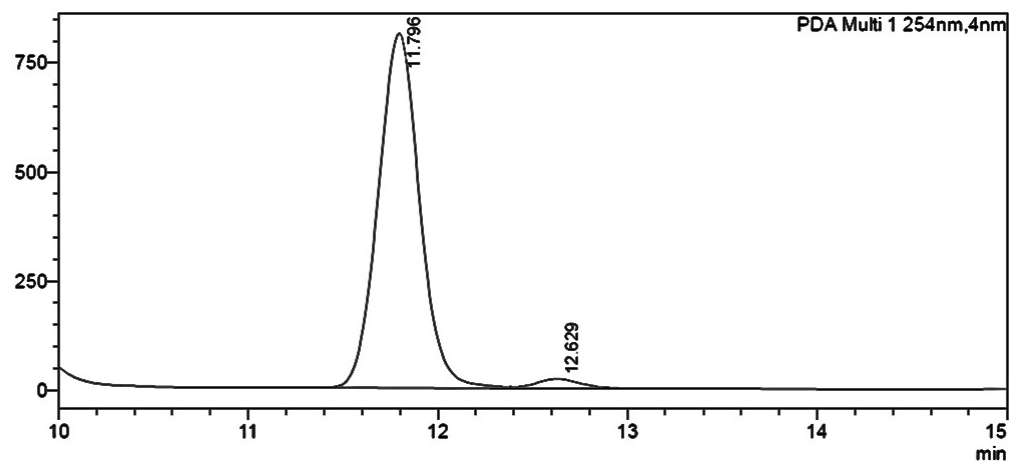

#### <Peak Table>

PDA Ch1 254nm

| Peak# | Ret. Time | Area     | Height | Conc.  | Unit | Mark | Name      |
|-------|-----------|----------|--------|--------|------|------|-----------|
| 1     | 11.796    | 12329819 | 813070 | 97.215 | %    |      | RT:11.796 |
| 2     | 12.629    | 353163   | 21619  | 2.785  | %    | V    | RT:12.629 |
| Total |           | 12682982 | 834688 |        |      |      |           |

## rac-5b

### <Chromatogram>

mAU

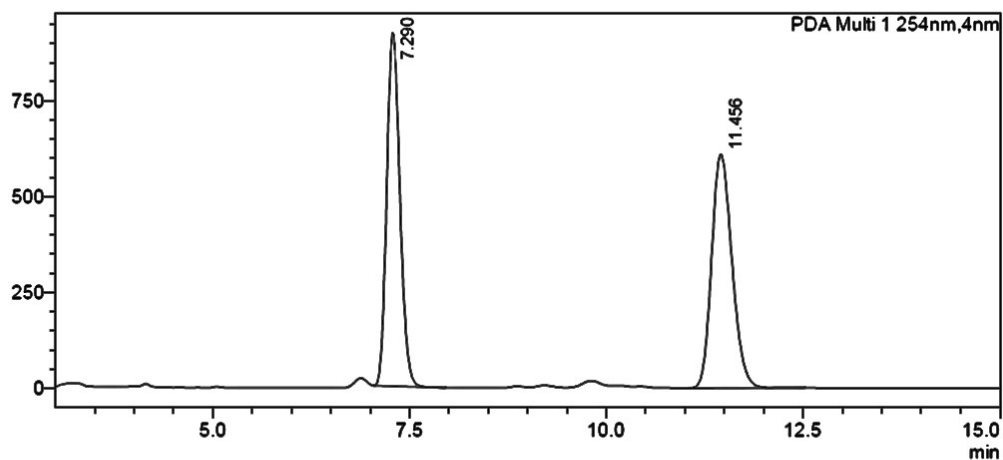

### <Peak Table>

PDA Ch1 254nm

| Peak# | Ret. Time | Area     | Height  | Conc.  | Unit | Mark | Name      |
|-------|-----------|----------|---------|--------|------|------|-----------|
| 1     | 7.290     | 10762087 | 921770  | 49.544 | %    |      | RT:7.290  |
| 2     | 11.456    | 10960045 | 610485  | 50.456 | %    |      | RT:11.456 |
| Total |           | 21722131 | 1532256 |        |      |      |           |

## 5b

### <Chromatogram>

mAU

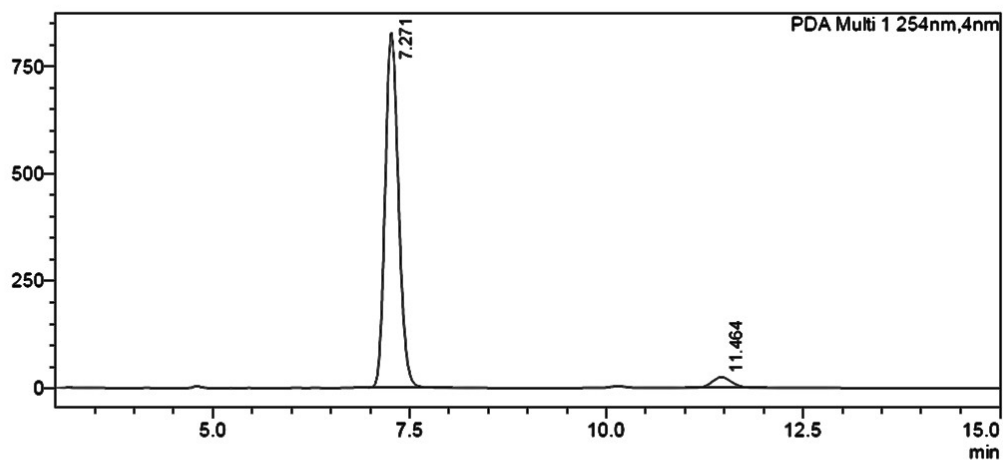

### <Peak Table>

PDA Ch1 254nm

| Peak# | Ret. Time | Area     | Height | Conc.  | Unit | Mark | Name      |
|-------|-----------|----------|--------|--------|------|------|-----------|
| 1     | 7.271     | 9785529  | 826059 | 95.673 | %    |      | RT:7.271  |
| 2     | 11.464    | 442615   | 24978  | 4.327  | %    |      | RT:11.464 |
| Total |           | 10228144 | 851037 |        |      |      |           |

## rac-5e

### <Chromatogram>

mAU

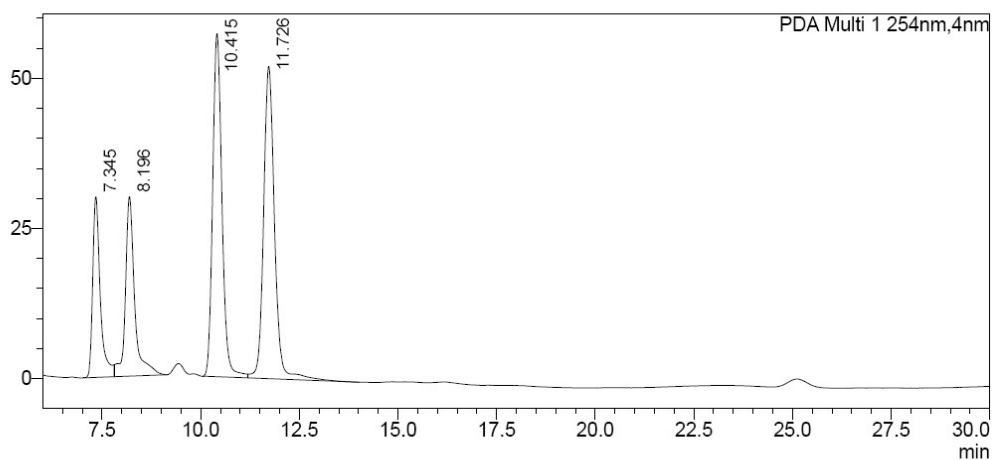

### <Peak Table>

PDA Ch1 254nm

| Peak# | Ret. Time | Area    | Height | Conc.  | Unit | Mark | Name      |
|-------|-----------|---------|--------|--------|------|------|-----------|
| 1     | 7.345     | 403361  | 29024  | 14.229 | %    |      | RT:7.345  |
| 2     | 8.196     | 487221  | 27549  | 17.188 | %    | V    | RT:8.196  |
| 3     | 10.415    | 937410  | 56074  | 33.069 | %    |      | RT:10.415 |
| 4     | 11.726    | 1006736 | 50349  | 35.514 | %    | V    | RT:11.726 |
| Total |           | 2834728 | 162996 |        |      |      |           |

## 5e

### <Chromatogram>

mAU

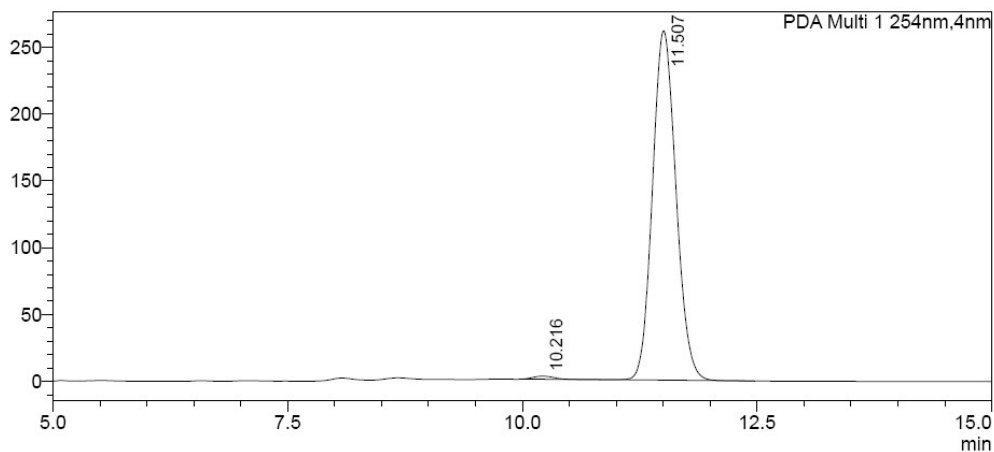

### <Peak Table>

PDA Ch1 254nm

| Peak# | Ret. Time | Area    | Height | Conc.  | Unit | Mark | Name      |
|-------|-----------|---------|--------|--------|------|------|-----------|
| 1     | 10.216    | 35215   | 2293   | 0.767  | %    |      | RT:10.216 |
| 2     | 11.507    | 4557478 | 245257 | 99.233 | %    |      | RT:11.507 |
| Total |           | 4592693 | 247550 |        |      |      |           |



## rac-5f

### <Chromatogram>

mAU

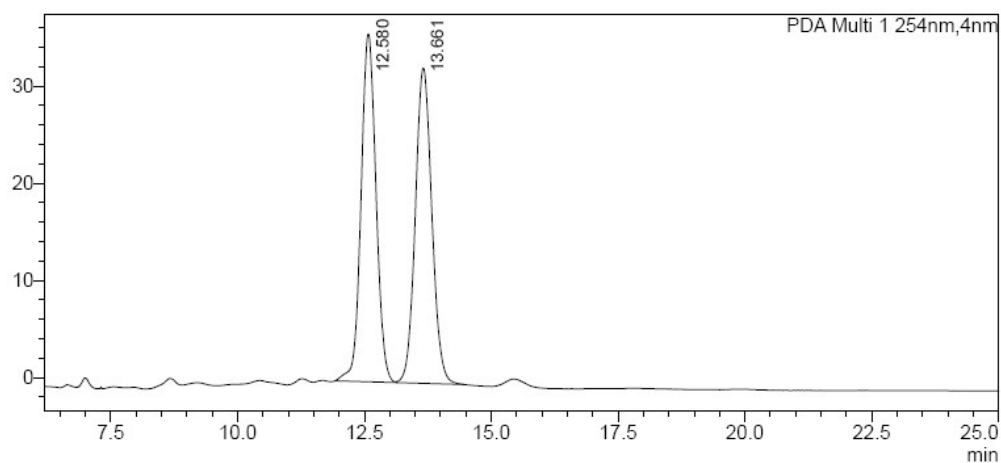

### <Peak Table>

PDA Ch1 254nm

| Peak# | Ret. Time | Area    | Height | Conc.  | Unit | Mark | Name      |
|-------|-----------|---------|--------|--------|------|------|-----------|
| 1     | 12.580    | 735032  | 35291  | 49.989 | %    |      | RT:12.580 |
| 2     | 13.661    | 735362  | 31502  | 50.011 | %    | V    | RT:13.661 |
| Total |           | 1470394 | 66793  |        |      |      |           |

## 5f

### <Chromatogram>

mAU

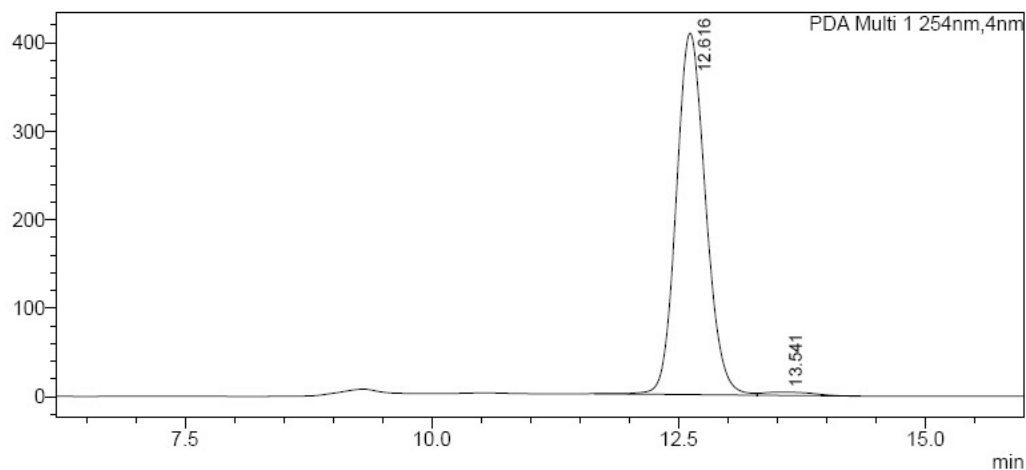

### <Peak Table>

PDA Ch1 254nm

| Peak# | Ret. Time | Area    | Height | Conc.  | Unit | Mark | Name      |
|-------|-----------|---------|--------|--------|------|------|-----------|
| 1     | 12.616    | 8434867 | 393842 | 98.515 | %    |      | RT:12.616 |
| 2     | 13.541    | 127116  | 3757   | 1.485  | %    | V    | RT:13.541 |
| Total |           | 8561984 | 397600 |        |      |      |           |

## rac-5g

### <Chromatogram>

mAU

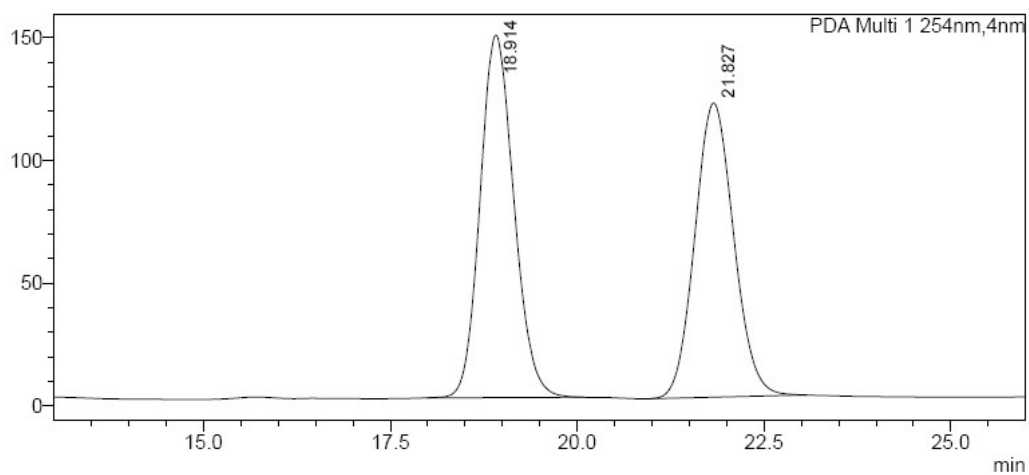

### <Peak Table>

PDA Ch1 254nm

| Peak# | Ret. Time | Area    | Height | Conc.  | Unit | Mark | Name      |
|-------|-----------|---------|--------|--------|------|------|-----------|
| 1     | 18.914    | 4664434 | 146221 | 51.770 | %    |      | RT:18.914 |
| 2     | 21.827    | 4345566 | 119039 | 48.230 | %    |      | RT:21.827 |
| Total |           | 9010001 | 265260 |        |      |      |           |

## 5g

### <Chromatogram>

mAU

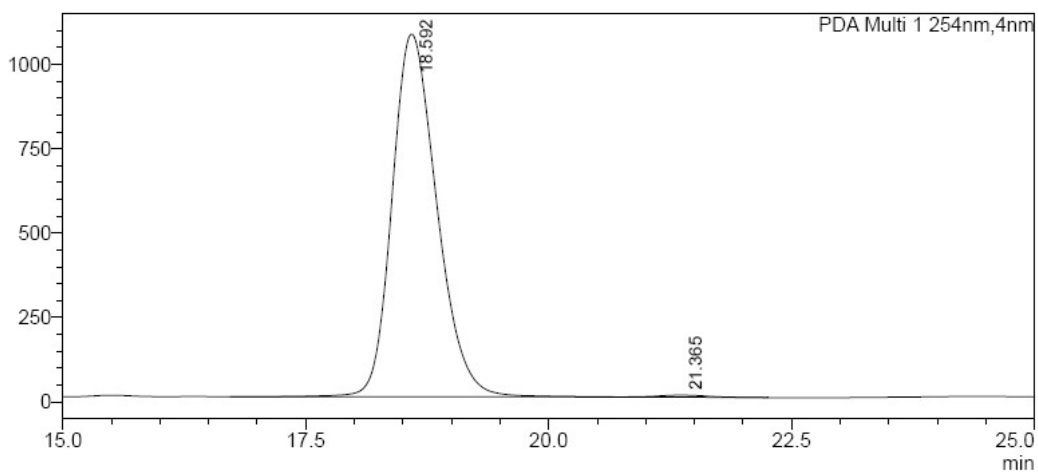

### <Peak Table>

PDA Ch1 254nm

| Peak# | Ret. Time | Area     | Height  | Conc.  | Unit | Mark | Name      |
|-------|-----------|----------|---------|--------|------|------|-----------|
| 1     | 18.592    | 34484052 | 1055738 | 99.434 | %    |      | RT:18.592 |
| 2     | 21.365    | 196233   | 5847    | 0.566  | %    |      | RT:21.365 |
| Total |           | 34680285 | 1061586 |        |      |      |           |

## rac-5h

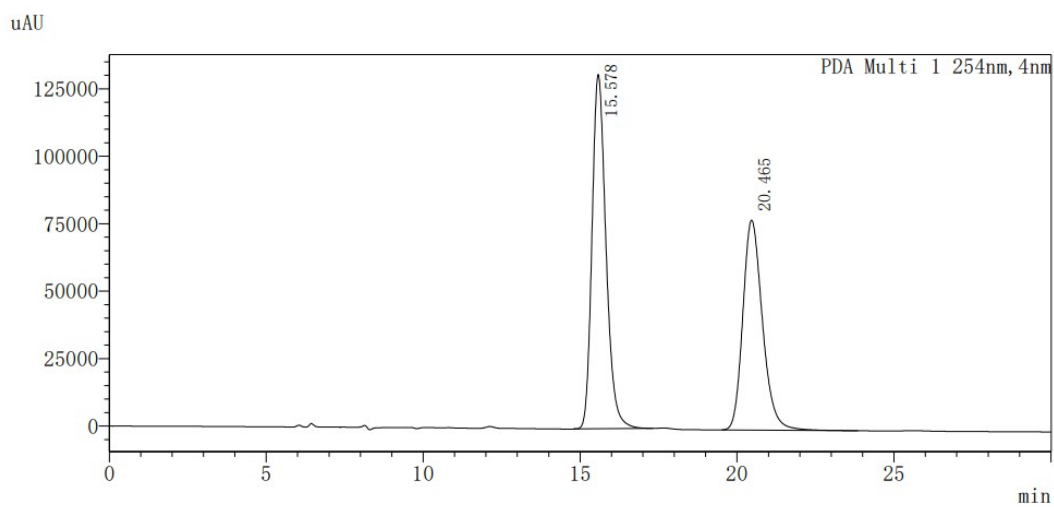

字符

| PDA Ch1 254nm |        |         |        |         |
|---------------|--------|---------|--------|---------|
| #             | [min]  | [uAU*s] | [uAU]  | %       |
| 1             | 15.578 | 4071795 | 131287 | 54.620  |
| 2             | 20.465 | 3383014 | 77831  | 45.380  |
| 总计            |        | 7454809 | 209118 | 100.000 |

## 5h

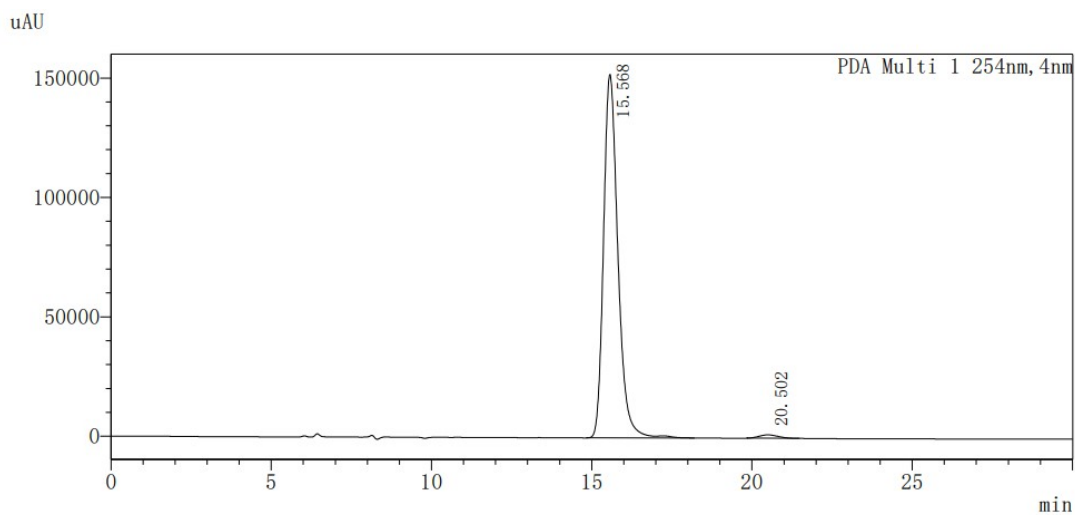

字符

| PDA Ch1 254nm |        |         |        |         |
|---------------|--------|---------|--------|---------|
| #             | [min]  | [uAU*s] | [uAU]  | %       |
| 1             | 15.568 | 4739680 | 152193 | 98.776  |
| 2             | 20.502 | 58743   | 1425   | 1.224   |
| 总计            |        | 4798423 | 153619 | 100.000 |

## rac-5i

### <Chromatogram>

mAU

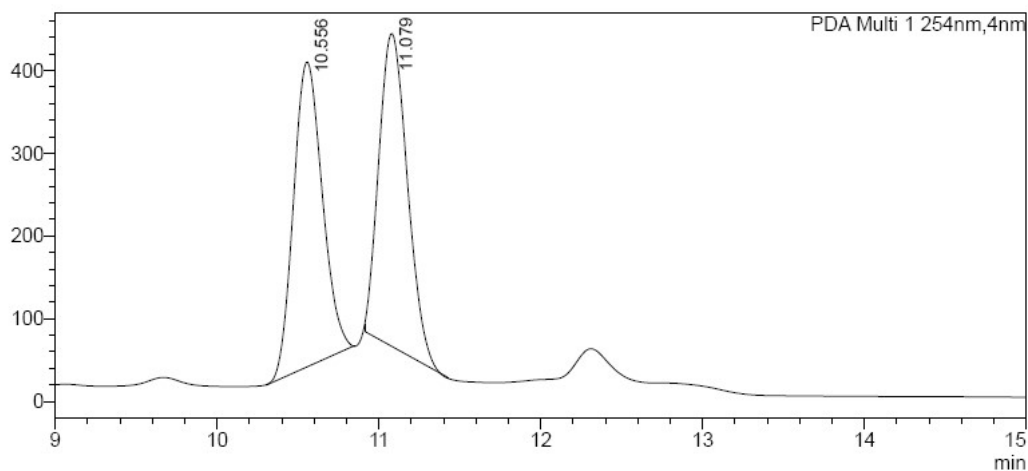

### <Peak Table>

PDA Ch1 254nm

| Peak# | Ret. Time | Area    | Height | Conc.  | Unit | Mark | Name      |
|-------|-----------|---------|--------|--------|------|------|-----------|
| 1     | 10.556    | 4578091 | 365757 | 49.820 | %    |      | RT:10.556 |
| 2     | 11.079    | 4611189 | 371061 | 50.180 | %    |      | RT:11.079 |
| Total |           | 9189280 | 736818 |        |      |      |           |

## 5i

### <Chromatogram>

mAU

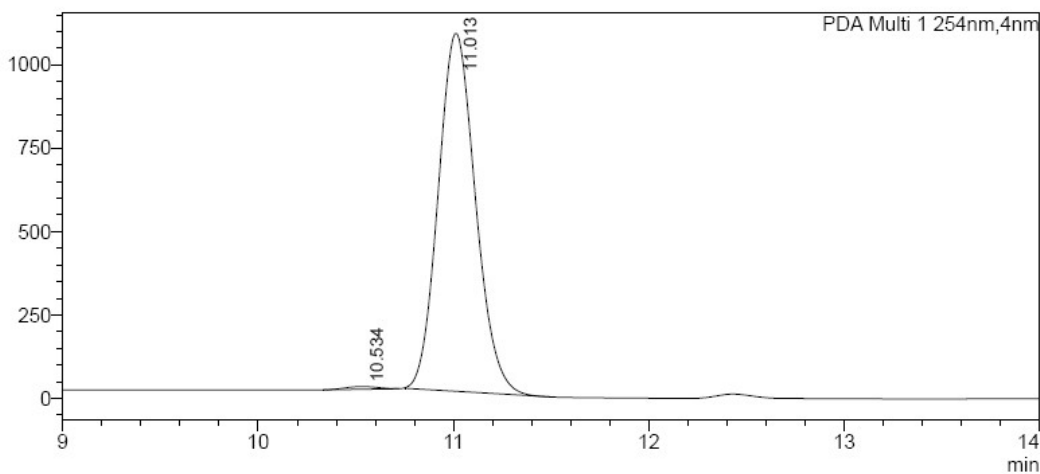

### <Peak Table>

PDA Ch1 254nm

| Peak# | Ret. Time | Area     | Height  | Conc.  | Unit | Mark | Name      |
|-------|-----------|----------|---------|--------|------|------|-----------|
| 1     | 10.534    | 94745    | 8200    | 0.661  | %    |      | RT:10.534 |
| 2     | 11.013    | 14230158 | 1051206 | 99.339 | %    |      | RT:11.013 |
| Total |           | 14324903 | 1059406 |        |      |      |           |

## rac-5j

### <Chromatogram>

mAU

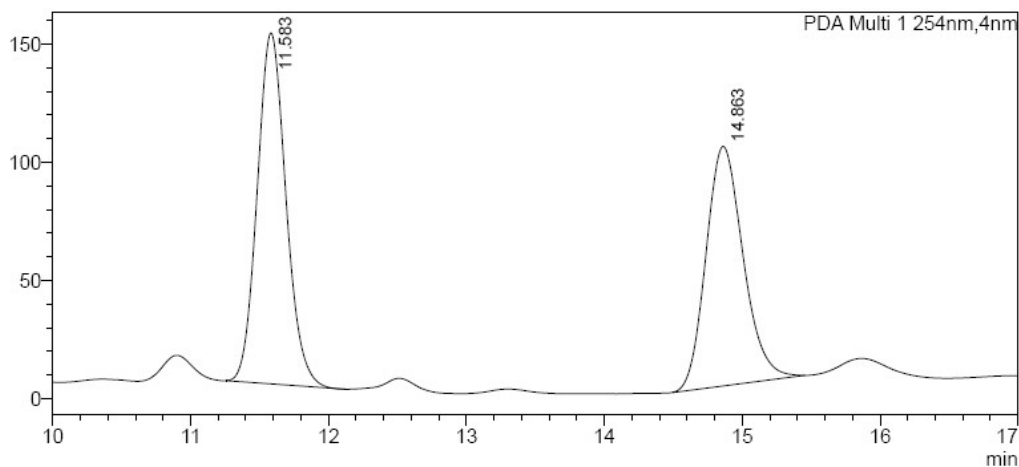

### <Peak Table>

PDA Ch1 254nm

| Peak# | Ret. Time | Area    | Height | Conc.  | Unit | Mark | Name      |
|-------|-----------|---------|--------|--------|------|------|-----------|
| 1     | 11.583    | 2150179 | 147083 | 53.040 | %    |      | RT:11.583 |
| 2     | 14.863    | 1903673 | 101001 | 46.960 | %    |      | RT:14.863 |
| Total |           | 4053852 | 248085 |        |      |      |           |

## 5j

### <Chromatogram>

mAU

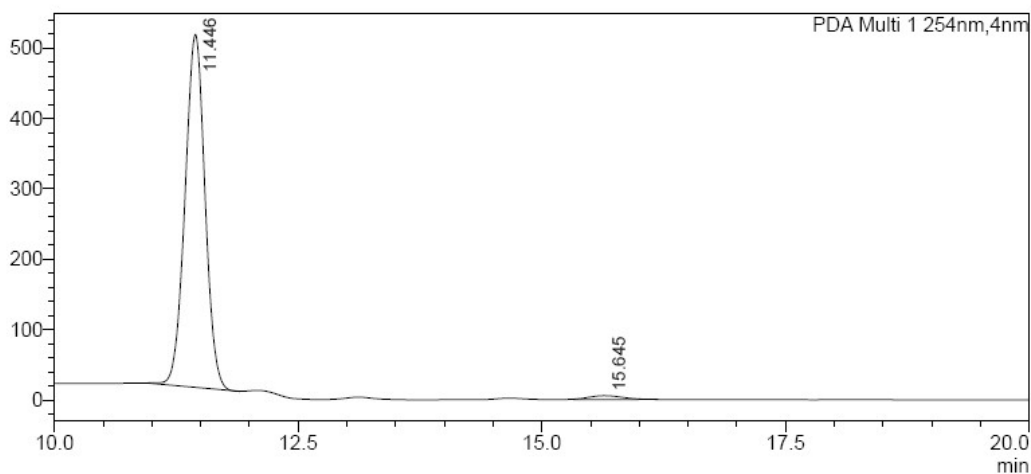

### <Peak Table>

PDA Ch1 254nm

| Peak# | Ret. Time | Area    | Height | Conc.  | Unit | Mark | Name      |
|-------|-----------|---------|--------|--------|------|------|-----------|
| 1     | 11.446    | 7155167 | 499622 | 98.252 | %    |      | RT:11.445 |
| 2     | 15.645    | 127329  | 5332   | 1.748  | %    | V    | RT:15.645 |
| Total |           | 7282496 | 504954 |        |      |      |           |

## rac-5k

### <Chromatogram>

mAU

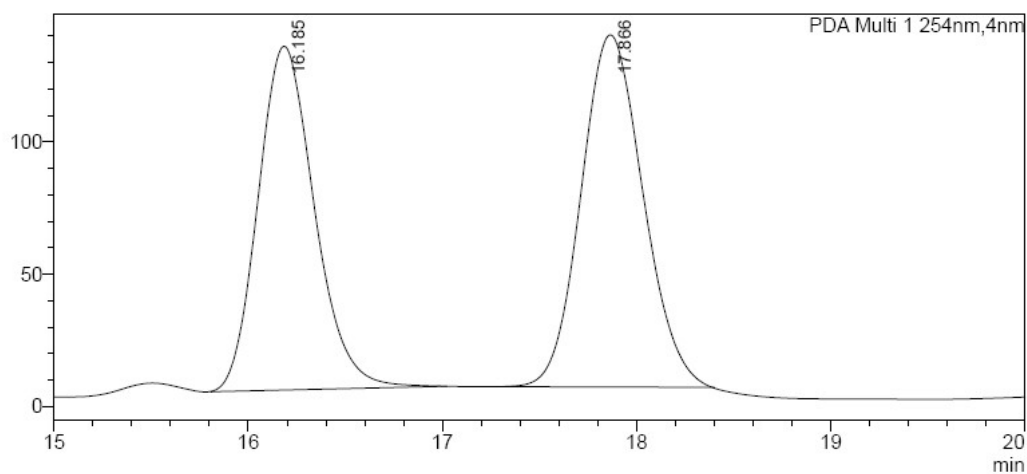

### <Peak Table>

PDA Ch1 254nm

| Peak# | Ret. Time | Area    | Height | Conc.  | Unit | Mark | Name      |
|-------|-----------|---------|--------|--------|------|------|-----------|
| 1     | 16.185    | 2628940 | 129634 | 47.072 | %    |      | RT:16.185 |
| 2     | 17.866    | 2956019 | 132454 | 52.928 | %    |      | RT:17.866 |
| Total |           | 5584959 | 262088 |        |      |      |           |

## 5k

### <Chromatogram>

mAU

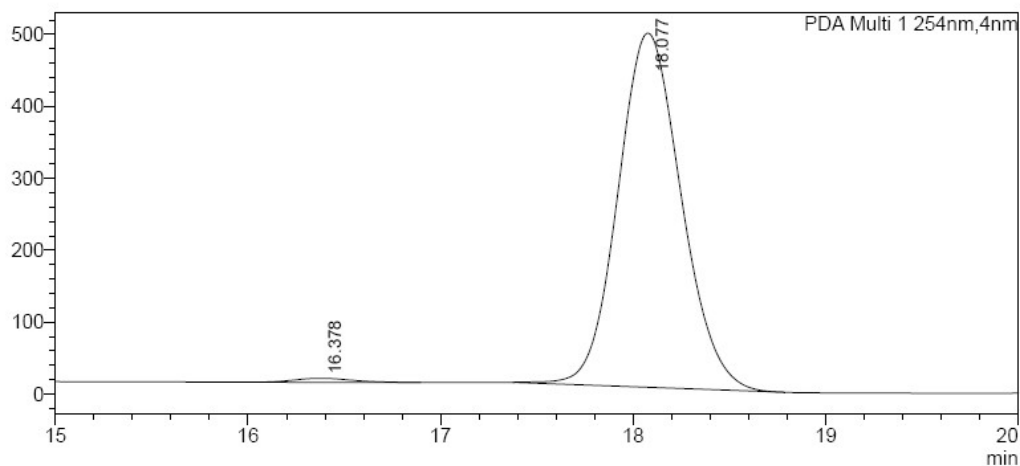

### <Peak Table>

PDA Ch1 254nm

| Peak# | Ret. Time | Area     | Height | Conc.  | Unit | Mark | Name      |
|-------|-----------|----------|--------|--------|------|------|-----------|
| 1     | 16.378    | 111926   | 5524   | 0.984  | %    |      | RT:16.378 |
| 2     | 18.077    | 11259083 | 491105 | 99.016 | %    |      | RT:18.077 |
| Total |           | 11371009 | 496629 |        |      |      |           |

## rac-5l

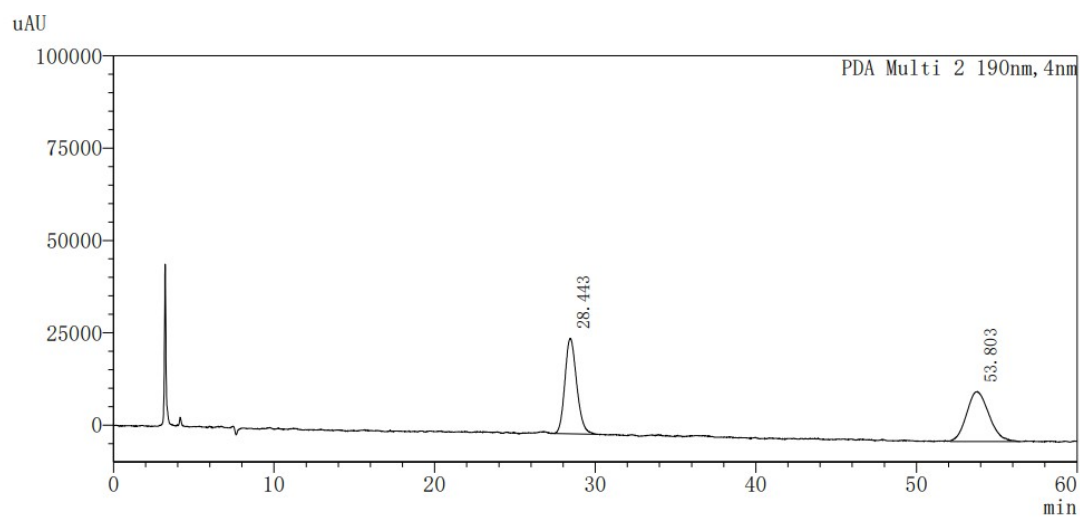

字符

| PDA Ch2 190nm |        |         |       |         |
|---------------|--------|---------|-------|---------|
| #             | [min]  | [uAU*s] | [uAU] | %       |
| 1             | 28.443 | 1320307 | 25830 | 50.267  |
| 2             | 53.803 | 1306277 | 13471 | 49.733  |
| 总计            |        | 2626584 | 39301 | 100.000 |

## 5l

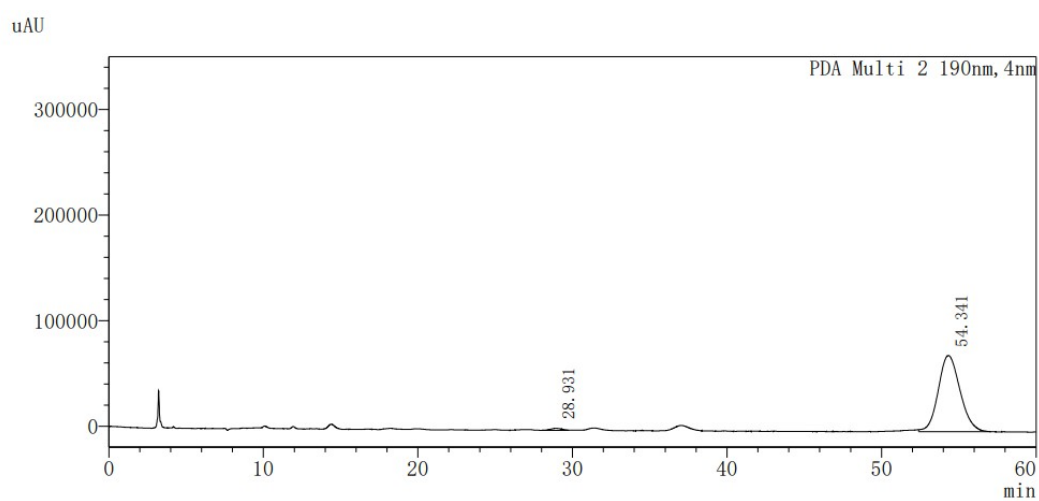

字符

| PDA Ch1 254nm |        |         |       |         |
|---------------|--------|---------|-------|---------|
| #             | [min]  | [uAU*s] | [uAU] | %       |
| 1             | 28.944 | 28751   | 658   | 0.894   |
| 2             | 54.320 | 3187363 | 30392 | 99.106  |
| 总计            |        | 3216114 | 31050 | 100.000 |

| PDA Ch2 190nm |        |         |       |         |
|---------------|--------|---------|-------|---------|
| #             | [min]  | [uAU*s] | [uAU] | %       |
| 1             | 28.931 | 107179  | 1983  | 1.493   |
| 2             | 54.341 | 7070651 | 72121 | 98.507  |
| 总计            |        | 7177830 | 74104 | 100.000 |

## rac-5m

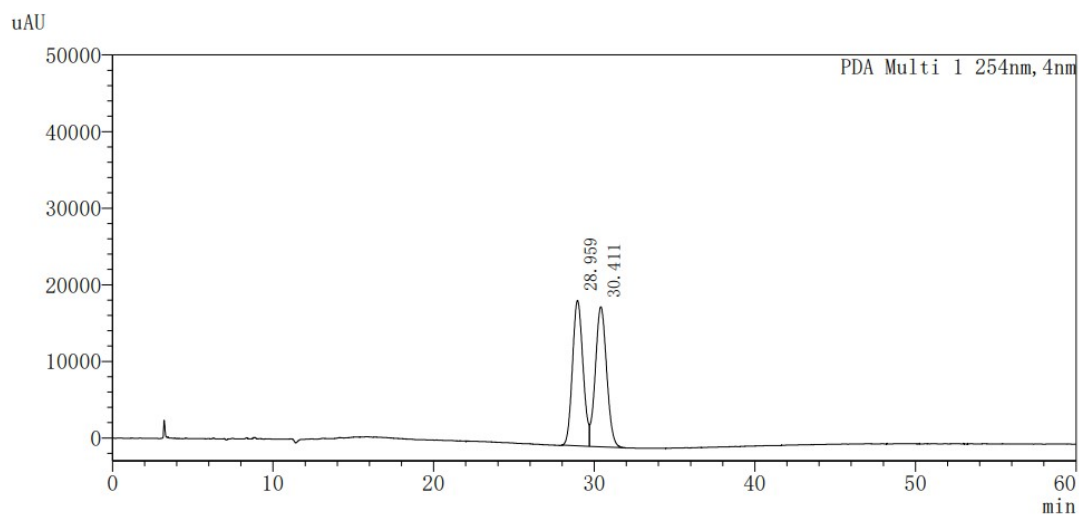

字符

| PDA Ch1 254nm |        |         |       |         |
|---------------|--------|---------|-------|---------|
| #             | [min]  | [uAU*s] | [uAU] | %       |
| 1             | 28.959 | 866461  | 18976 | 49.195  |
| 2             | 30.411 | 894808  | 18279 | 50.805  |
| 总计            |        | 1761269 | 37255 | 100.000 |

## 5m

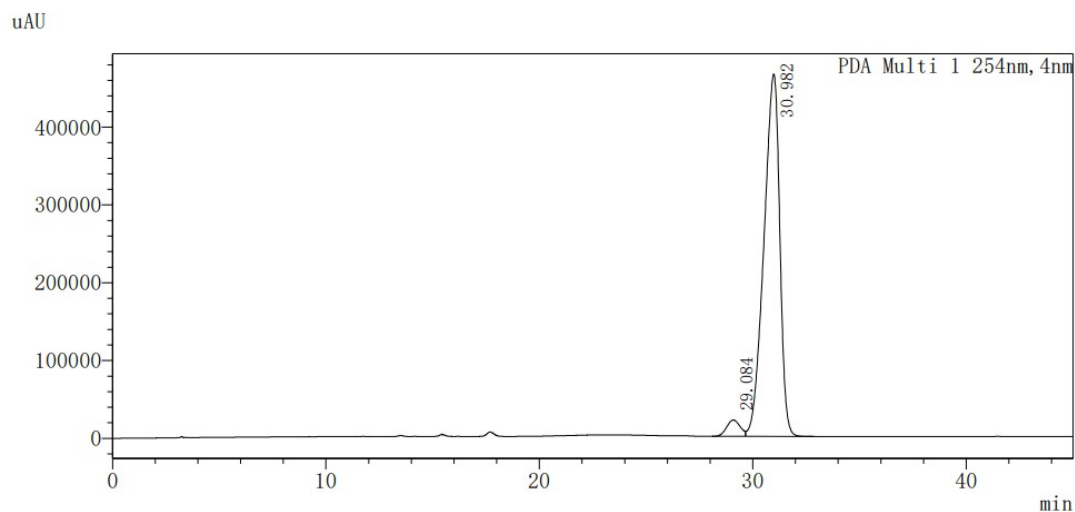

字符

| PDA Ch1 254nm |        |          |        |         |
|---------------|--------|----------|--------|---------|
| #             | [min]  | [uAU*s]  | [uAU]  | %       |
| 1             | 29.084 | 936511   | 21125  | 3.754   |
| 2             | 30.982 | 24009794 | 465706 | 96.246  |
| 总计            |        | 24946305 | 486832 | 100.000 |



## rac-5n

uAU

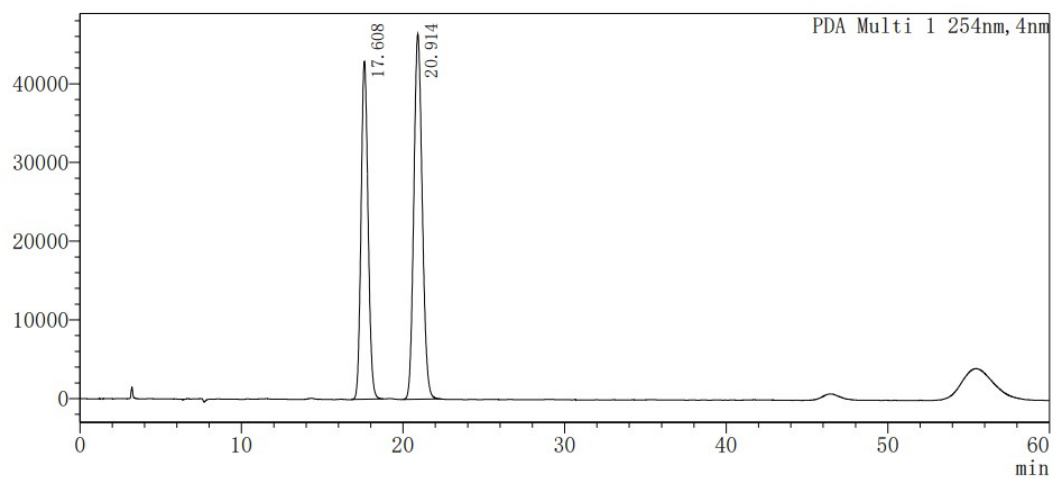

字符

PDA Ch1 254nm

| #  | [min]  | [uAU*s] | [uAU] | %       |
|----|--------|---------|-------|---------|
| 1  | 17.608 | 1295050 | 42943 | 43.467  |
| 2  | 20.914 | 1684322 | 46381 | 56.533  |
| 总计 |        | 2979372 | 89324 | 100.000 |

## 5n

uAU

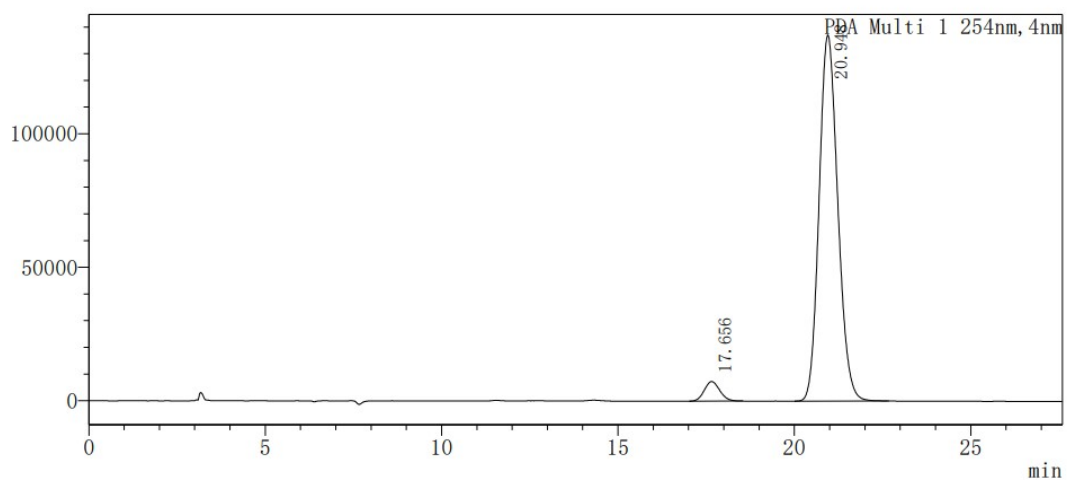

字符

PDA Ch1 254nm

| #  | [min]  | [uAU*s] | [uAU]  | %       |
|----|--------|---------|--------|---------|
| 1  | 17.656 | 223413  | 7333   | 4.234   |
| 2  | 20.948 | 5052817 | 137107 | 95.766  |
| 总计 |        | 5276231 | 144440 | 100.000 |
